# Supplementary material for: Expression of the endocannabinoid system and response to cannabinoid components by the human fetal testis
Source: BMC Med. 2023 Jul 11;21:219. doi: 10.1186/s12916-023-02916-5 (PMC10334520; doi:10.1186/s12916-023-02916-5)
Supplement: Supplementary file 3 — Additional file 3: Table 1. List of DEGs after CBD and/or THC treatments. [file 12916_2023_2916_MOESM3_ESM.xlsx]

## Sheet: STRATEGY3.corr.manual_patterns_
	description	biological_process	molecular_function	cellular_component	kegg_pathway	WikiPathways	CBD - 10-12GW	CBD - 12-14GW	THC - 10-12GW	THC - 12-14GW	CBD-THC - 10-12GW	CBD-THC - 12-14GW	pca.mclust patterns	testis_10-12GW_CBD_EH3840	testis_10-12GW_CBD_EH4026	testis_10-12GW_CBD_EH4072	testis_10-12GW_CBD_EH4105	testis_10-12GW_CBD_EH4111	testis_10-12GW_CBD_EH4112	testis_10-12GW_CBD_EH4138	testis_10-12GW_CBD_EH4142	testis_10-12GW_CBD_EH4155	testis_10-12GW_CBD_EH4174	testis_10-12GW_THC_EH3413	testis_10-12GW_THC_EH4072	testis_10-12GW_THC_EH4080	testis_10-12GW_THC_EH4105	testis_10-12GW_THC_EH4111	testis_10-12GW_THC_EH4138	testis_10-12GW_THC_EH4142	testis_10-12GW_THC_EH4147	testis_10-12GW_THC_EH4155	testis_10-12GW_THC_EH4174	testis_10-12GW_CBD-THC_EH3417	testis_10-12GW_CBD-THC_EH4072	testis_10-12GW_CBD-THC_EH4080	testis_10-12GW_CBD-THC_EH4105	testis_10-12GW_CBD-THC_EH4111	testis_10-12GW_CBD-THC_EH4112	testis_10-12GW_CBD-THC_EH4142	testis_10-12GW_CBD-THC_EH4147	testis_10-12GW_CBD-THC_EH4155	testis_12-14GW_CBD_EH3265	testis_12-14GW_CBD_EH3345	testis_12-14GW_CBD_EH3351	testis_12-14GW_CBD_EH3366	testis_12-14GW_CBD_EH3412	testis_12-14GW_CBD_EH4075	testis_12-14GW_CBD_EH4109
ACAT2	acetyl-CoA acetyltransferase 2	alcohol biosynthetic process (GO:0046165)|alcohol metabolic process (GO:0006066)|biological_process (GO:0008150)|biosynthetic process (GO:0009058)|carboxylic acid catabolic process (GO:0046395)|carboxylic acid metabolic process (GO:0019752)|catabolic process (GO:0009056)|cellular catabolic process (GO:0044248)|cellular lipid catabolic process (GO:0044242)|cellular lipid metabolic process (GO:0044…	acetyl-CoA C-acetyltransferase activity (GO:0003985)|acetyl-CoA C-acyltransferase activity (GO:0003988)|acetyltransferase activity (GO:0016407)|binding (GO:0005488)|C-acetyltransferase activity (GO:0016453)|C-acyltransferase activity (GO:0016408)|catalytic activity (GO:0003824)|molecular_function (GO:0003674)|protein binding (GO:0005515)|transferase activity (GO:0016740)|transferase activity, tra…	cellular anatomical entity (GO:0110165)|cellular_component (GO:0005575)|cytoplasm (GO:0005737)|cytosol (GO:0005829)|extracellular exosome (GO:0070062)|extracellular organelle (GO:0043230)|extracellular region (GO:0005576)|extracellular space (GO:0005615)|extracellular vesicle (GO:1903561)|intracellular anatomical structure (GO:0005622)|intracellular membrane-bounded organelle (GO:0043231)|intrace…	hsa00071 Fatty acid degradation|hsa00280 Valine, leucine and isoleucine degradation|hsa00310 Lysine degradation|hsa00380 Tryptophan metabolism|hsa00620 Pyruvate metabolism|hsa00630 Glyoxylate and dicarboxylate metabolism|hsa00650 Butanoate metabolism|hsa00900 Terpenoid backbone biosynthesis|hsa01100 Metabolic pathways|hsa01200 Carbon metabolism|hsa01212 Fatty acid metabolism|hsa04975 Fat digestio…	Cholesterol biosynthesis (WP1795)|Cholesterol biosynthesis, regulation and transport (WP4281)|Cholesterol metabolism with Bloch and Kandutsch-Russell pathways (WP4718)|Disorders in ketolysis (WP5195)|Mevalonate arm of cholesterol biosynthesis pathway (WP4190)|Mevalonate pathway (WP3963)	DOWN	-	-	-	-	DOWN	P1	-0.739774	-1.31449	-1.27893	-0.6739	0.16291	-1.02469	-0.711264	-1.1049	-0.929716	0.221644	0.0355818	-0.990709	-0.647758	-0.0345552	0.0770951	-0.624232	-0.907797	-0.189649	0.498986	-0.421093	-1.47234	-0.331198	-0.113718	-0.661162	-1.06539	-0.13952	-1.17691	-1.45213	-1.31965	-1.07481	-0.709879	-0.00706128	-0.33709	-0.32433	-0.232297	-0.774034
CETN2	centrin 2	amide transport (GO:0042886)|anion transport (GO:0006820)|biological regulation (GO:0065007)|biological_process (GO:0008150)|cell cycle (GO:0007049)|cell cycle G2/M phase transition (GO:0044839)|cell cycle phase transition (GO:0044770)|cell cycle process (GO:0022402)|cell division (GO:0051301)|cell projection assembly (GO:0030031)|cell projection organization (GO:0030030)|cellular aromatic compou…	binding (GO:0005488)|calcium ion binding (GO:0005509)|cation binding (GO:0043169)|cytoskeletal protein binding (GO:0008092)|G-protein beta/gamma-subunit complex binding (GO:0031683)|heterotrimeric G-protein binding (GO:0032795)|ion binding (GO:0043167)|metal ion binding (GO:0046872)|microtubule binding (GO:0008017)|molecular_function (GO:0003674)|protein-containing complex binding (GO:0044877)|pr…	9+0 non-motile cilium (GO:0097731)|9+2 motile cilium (GO:0097729)|apical part of cell (GO:0045177)|cell projection (GO:0042995)|cellular anatomical entity (GO:0110165)|cellular_component (GO:0005575)|centriole (GO:0005814)|centrosome (GO:0005813)|ciliary basal body (GO:0036064)|ciliary transition zone (GO:0035869)|cilium (GO:0005929)|cytoplasm (GO:0005737)|cytoskeleton (GO:0005856)|cytosol (GO:00…	hsa03420 Nucleotide excision repair	Assembly of the primary cilium (WP3498)|Cilium Assembly (WP4124)|DNA repair pathways, full network (WP4946)|Joubert syndrome (WP4656)|Mitotic G2-G2/M phases (WP1859)|Mitotic Prometaphase (WP2652)|Nucleotide Excision Repair (WP1980)|Nucleotide excision repair (WP4753)|Nucleotide excision repair in xeroderma pigmentosum (WP5114)|SUMOylation of DNA damage response and repair proteins (WP3327)	DOWN	-	-	-	DOWN	-	P1	-0.112859	-0.479929	0.0192241	-0.559762	-0.0619253	-0.491516	-0.607626	-0.322585	-0.323061	0.0388383	0.231532	-0.0698548	-0.337378	-0.263298	-0.793886	0.187163	-0.283991	-0.263828	0.0986933	-0.256927	-1.04758	-0.927045	-0.640018	-0.686772	-0.518943	-0.455923	-0.273597	-0.382113	-0.198552	0.409057	-0.0481076	-0.463949	-0.530586	-1.17115	-0.654108	0.0441309
DHCR7	7-dehydrocholesterol reductase	alcohol biosynthetic process (GO:0046165)|alcohol metabolic process (GO:0006066)|biological regulation (GO:0065007)|biological_process (GO:0008150)|biosynthetic process (GO:0009058)|brassinosteroid biosynthetic process (GO:0016132)|brassinosteroid metabolic process (GO:0016131)|cholesterol biosynthetic process (GO:0006695)|cholesterol biosynthetic process via desmosterol (GO:0033489)|cholesterol …	7-dehydrocholesterol reductase activity (GO:0047598)|binding (GO:0005488)|catalytic activity (GO:0003824)|heterocyclic compound binding (GO:1901363)|molecular_function (GO:0003674)|NADP binding (GO:0050661)|nucleoside phosphate binding (GO:1901265)|nucleotide binding (GO:0000166)|organic cyclic compound binding (GO:0097159)|oxidoreductase activity (GO:0016491)|oxidoreductase activity, acting on t…	bounding membrane of organelle (GO:0098588)|cellular anatomical entity (GO:0110165)|cellular_component (GO:0005575)|cytoplasm (GO:0005737)|endomembrane system (GO:0012505)|endoplasmic reticulum (GO:0005783)|endoplasmic reticulum membrane (GO:0005789)|endoplasmic reticulum subcompartment (GO:0098827)|envelope (GO:0031975)|integral component of endoplasmic reticulum membrane (GO:0030176)|integral c…	hsa00100 Steroid biosynthesis|hsa01100 Metabolic pathways	7-oxo-C and 7-beta-HC pathways (WP5064)|Activation of gene expression by SREBF (SREBP) (WP2706)|Cholesterol biosynthesis (WP1795)|Cholesterol biosynthesis pathway (WP197)|Cholesterol biosynthesis pathway. (WP5226)|Cholesterol biosynthesis with skeletal dysplasias (WP4804)|Cholesterol biosynthesis, regulation and transport (WP4281)|Cholesterol metabolism with Bloch and Kandutsch-Russell pathways (…	DOWN	-	-	-	-	-	P1	-0.973903	-0.975615	-0.722986	0.198279	-0.346392	-1.38797	-1.03073	-0.489262	-0.0712509	-0.435015	-0.700964	-0.153889	0.650593	0.652389	-0.104516	0.164233	-0.568703	-1.47582	-0.203374	0.701733	-0.662882	0.687038	-0.780096	-0.14745	0.189335	-0.0870583	-0.785223	-1.27808	-0.637847	0.0544425	-0.545775	-1.09482	-0.463905	-0.798886	0.274835	-0.408384
EBP	EBP cholestenol delta-isomerase	alcohol biosynthetic process (GO:0046165)|alcohol metabolic process (GO:0006066)|anatomical structure development (GO:0048856)|biological_process (GO:0008150)|biosynthetic process (GO:0009058)|cholesterol biosynthetic process (GO:0006695)|cholesterol biosynthetic process via desmosterol (GO:0033489)|cholesterol biosynthetic process via lathosterol (GO:0033490)|cholesterol metabolic process (GO:00…	binding (GO:0005488)|C-8 sterol isomerase activity (GO:0000247)|catalytic activity (GO:0003824)|cholestenol delta-isomerase activity (GO:0047750)|identical protein binding (GO:0042802)|intramolecular oxidoreductase activity (GO:0016860)|intramolecular oxidoreductase activity, transposing C=C bonds (GO:0016863)|isomerase activity (GO:0016853)|molecular transducer activity (GO:0060089)|molecular_fu…	cell periphery (GO:0071944)|cellular anatomical entity (GO:0110165)|cellular_component (GO:0005575)|cytoplasm (GO:0005737)|cytoplasmic vesicle (GO:0031410)|endomembrane system (GO:0012505)|endoplasmic reticulum (GO:0005783)|endoplasmic reticulum membrane (GO:0005789)|endoplasmic reticulum subcompartment (GO:0098827)|envelope (GO:0031975)|integral component of membrane (GO:0016021)|integral compon…	hsa00100 Steroid biosynthesis|hsa01100 Metabolic pathways	7-oxo-C and 7-beta-HC pathways (WP5064)|Cholesterol biosynthesis (WP1795)|Cholesterol biosynthesis with skeletal dysplasias (WP4804)|Cholesterol metabolism with Bloch and Kandutsch-Russell pathways (WP4718)|Cholesterol synthesis disorders (WP5193)|Oxysterols derived from cholesterol (WP4545)	DOWN	-	-	-	DOWN	-	P1	-0.631725	-0.941574	-1.00306	-0.240823	-0.296412	-0.583457	-0.283951	-0.34753	-1.01707	-0.0890709	0.299661	-0.383362	-0.318318	-0.471724	-0.277281	-0.310101	-0.951262	-0.0135174	-0.0569918	-0.253337	-0.309514	-1.11031	-0.307886	-0.60204	-0.967878	-0.388013	-0.746581	-0.610304	-0.00479379	0.805754	-0.290009	0.147354	0.347705	0.0865602	-0.56978	-0.0431657
ENC1	ectodermal-neural cortex 1	amide biosynthetic process (GO:0043604)|anatomical structure development (GO:0048856)|biological regulation (GO:0065007)|biological_process (GO:0008150)|biosynthetic process (GO:0009058)|catabolic process (GO:0009056)|cell development (GO:0048468)|cell differentiation (GO:0030154)|cell projection organization (GO:0030030)|cellular amide metabolic process (GO:0043603)|cellular biosynthetic process…	actin binding (GO:0003779)|binding (GO:0005488)|cytoskeletal protein binding (GO:0008092)|molecular_function (GO:0003674)|protein binding (GO:0005515)	catalytic complex (GO:1902494)|cell body (GO:0044297)|cellular anatomical entity (GO:0110165)|cellular_component (GO:0005575)|Cul3-RING ubiquitin ligase complex (GO:0031463)|cullin-RING ubiquitin ligase complex (GO:0031461)|cytoplasm (GO:0005737)|cytoskeleton (GO:0005856)|intracellular anatomical structure (GO:0005622)|intracellular membrane-bounded organelle (GO:0043231)|intracellular non-membra…		Glucocorticoid receptor pathway (WP2880)|Nuclear receptors meta-pathway (WP2882)	DOWN	-	DOWN	-	DOWN	-	P1	-0.916349	-1.23115	-0.866435	-0.283367	-0.424792	-0.486364	-0.350317	0.162511	-1.25153	-0.823968	-0.699459	-0.345634	-0.261141	0.0114464	-0.40499	-0.335187	-1.20781	-0.364585	-0.328277	-0.902656	-1.14165	-0.978483	-0.798899	-0.644891	-1.56324	-0.462559	-0.421466	-0.569585	-0.618083	0.0370798	-0.436372	1.01597	-1.20716	0.0997152	-0.0406852	-0.542177
ERG28	ergosterol biosynthesis 28 homolog	biological_process (GO:0008150)|biosynthetic process (GO:0009058)|lipid biosynthetic process (GO:0008610)|lipid metabolic process (GO:0006629)|metabolic process (GO:0008152)|organic cyclic compound biosynthetic process (GO:1901362)|organic cyclic compound metabolic process (GO:1901360)|organic hydroxy compound biosynthetic process (GO:1901617)|organic hydroxy compound metabolic process (GO:190161…	binding (GO:0005488)|identical protein binding (GO:0042802)|molecular adaptor activity (GO:0060090)|molecular_function (GO:0003674)|protein-macromolecule adaptor activity (GO:0030674)|protein binding (GO:0005515)	cellular anatomical entity (GO:0110165)|cellular_component (GO:0005575)|cytoplasm (GO:0005737)|cytoplasmic vesicle (GO:0031410)|endomembrane system (GO:0012505)|endoplasmic reticulum (GO:0005783)|endoplasmic reticulum membrane (GO:0005789)|endoplasmic reticulum subcompartment (GO:0098827)|integral component of membrane (GO:0016021)|intracellular anatomical structure (GO:0005622)|intracellular mem…			DOWN	-	-	-	DOWN	DOWN	P1	-0.320939	-0.658323	-0.285919	-0.132096	-0.40857	-0.352819	-0.609749	-0.824346	-0.549876	-0.105349	0.122396	-0.604314	0.143442	-0.488619	-0.542116	-0.207895	-0.512575	-0.163337	0.277439	-0.19781	-1.21978	-0.726503	-0.748169	-0.129307	-1.03065	-0.303522	-0.465065	-0.519356	-0.337813	0.07084	-0.952665	-0.509636	-0.822124	-0.124596	-0.62283	-0.573274
FDFT1	farnesyl-diphosphate farnesyltransferase 1	alcohol biosynthetic process (GO:0046165)|alcohol metabolic process (GO:0006066)|biological regulation (GO:0065007)|biological_process (GO:0008150)|biosynthetic process (GO:0009058)|cellular lipid metabolic process (GO:0044255)|cellular metabolic process (GO:0044237)|cellular process (GO:0009987)|cholesterol biosynthetic process (GO:0006695)|cholesterol metabolic process (GO:0008203)|farnesyl dip…	binding (GO:0005488)|catalytic activity (GO:0003824)|cation binding (GO:0043169)|farnesyl-diphosphate farnesyltransferase activity (GO:0004310)|farnesyltranstransferase activity (GO:0004311)|ion binding (GO:0043167)|metal ion binding (GO:0046872)|molecular_function (GO:0003674)|prenyltransferase activity (GO:0004659)|protein binding (GO:0005515)|squalene synthase activity (GO:0051996)|transferase…	cellular anatomical entity (GO:0110165)|cellular_component (GO:0005575)|cytoplasm (GO:0005737)|endomembrane system (GO:0012505)|endoplasmic reticulum (GO:0005783)|endoplasmic reticulum membrane (GO:0005789)|endoplasmic reticulum subcompartment (GO:0098827)|integral component of membrane (GO:0016021)|intracellular anatomical structure (GO:0005622)|intracellular membrane-bounded organelle (GO:00432…	hsa00100 Steroid biosynthesis|hsa01100 Metabolic pathways	Activation of gene expression by SREBF (SREBP) (WP2706)|Cholesterol biosynthesis (WP1795)|Cholesterol biosynthesis pathway (WP197)|Cholesterol biosynthesis pathway. (WP5226)|Cholesterol biosynthesis, regulation and transport (WP4281)|Cholesterol metabolism with Bloch and Kandutsch-Russell pathways (WP4718)|Cholesterol synthesis disorders (WP5193)|Demo_complete (WP3418)|Ferroptosis (WP4313)|Mevalo…	DOWN	-	-	-	-	DOWN	P1	-0.860832	-1.63474	-0.502546	-0.250767	-0.837746	-0.706933	-0.805643	-0.755521	-1.0636	-0.273657	-0.0230584	-0.670398	-0.800334	-0.417291	0.0378318	-0.310313	-0.731145	0.00188781	-0.0824983	-0.147835	-0.971163	-0.290793	-1.18413	-0.935534	-0.361373	0.19052	-1.78227	-0.35779	-0.664027	0.54108	-1.23167	-0.0261331	-0.861445	-0.830623	-1.22969	-0.852551
FDPS	farnesyl diphosphate synthase	alcohol biosynthetic process (GO:0046165)|alcohol metabolic process (GO:0006066)|biological process involved in interspecies interaction between organisms (GO:0044419)|biological process involved in symbiotic interaction (GO:0044403)|biological regulation (GO:0065007)|biological_process (GO:0008150)|biosynthetic process (GO:0009058)|cellular biosynthetic process (GO:0044249)|cellular lipid metabo…	binding (GO:0005488)|catalytic activity (GO:0003824)|cation binding (GO:0043169)|dimethylallyltranstransferase activity (GO:0004161)|geranyltranstransferase activity (GO:0004337)|heterocyclic compound binding (GO:1901363)|ion binding (GO:0043167)|metal ion binding (GO:0046872)|molecular_function (GO:0003674)|nucleic acid binding (GO:0003676)|organic cyclic compound binding (GO:0097159)|prenyltran…	cellular anatomical entity (GO:0110165)|cellular_component (GO:0005575)|cytoplasm (GO:0005737)|cytosol (GO:0005829)|intracellular anatomical structure (GO:0005622)|intracellular membrane-bounded organelle (GO:0043231)|intracellular organelle (GO:0043229)|intracellular organelle lumen (GO:0070013)|membrane-bounded organelle (GO:0043227)|membrane-enclosed lumen (GO:0031974)|nuclear lumen (GO:003198…	hsa00900 Terpenoid backbone biosynthesis|hsa01100 Metabolic pathways|hsa05164 Influenza A|hsa05166 Human T-cell leukemia virus 1 infection	Activation of gene expression by SREBF (SREBP) (WP2706)|Cholesterol biosynthesis (WP1795)|Cholesterol biosynthesis pathway (WP197)|Cholesterol biosynthesis pathway. (WP5226)|Cholesterol biosynthesis, regulation and transport (WP4281)|Cholesterol metabolism with Bloch and Kandutsch-Russell pathways (WP4718)|Cholesterol synthesis disorders (WP5193)|Mevalonate arm of cholesterol biosynthesis pathway…	DOWN	-	DOWN	-	DOWN	DOWN	P1	-0.743819	-1.3506	-1.28499	-0.3685	-0.55519	-0.844949	-0.607278	-0.862933	-1.14901	-0.480931	-0.0517564	-0.876033	-0.380055	-0.570722	-0.314115	-0.399398	-1.18656	-0.422075	-0.396524	-0.62941	-1.89704	-1.3566	-1.9073	-0.805773	-1.71828	-0.105	-1.29584	-1.19968	-1.23791	0.0583978	-1.43641	0.00472959	-1.70168	-0.732913	-0.591175	-1.12344
HBE1	hemoglobin subunit epsilon 1	biological regulation (GO:0065007)|biological_process (GO:0008150)|blood coagulation (GO:0007596)|catabolic process (GO:0009056)|cellular catabolic process (GO:0044248)|cellular detoxification (GO:1990748)|cellular metabolic process (GO:0044237)|cellular oxidant detoxification (GO:0098869)|cellular process (GO:0009987)|cellular response to chemical stimulus (GO:0070887)|cellular response to stimu…	antioxidant activity (GO:0016209)|binding (GO:0005488)|catalytic activity (GO:0003824)|cation binding (GO:0043169)|haptoglobin binding (GO:0031720)|heme binding (GO:0020037)|hemoglobin alpha binding (GO:0031721)|hemoglobin binding (GO:0030492)|heterocyclic compound binding (GO:1901363)|ion binding (GO:0043167)|metal ion binding (GO:0046872)|molecular carrier activity (GO:0140104)|molecular_functi…	blood microparticle (GO:0072562)|cellular anatomical entity (GO:0110165)|cellular_component (GO:0005575)|cytoplasm (GO:0005737)|cytosol (GO:0005829)|extracellular region (GO:0005576)|extracellular space (GO:0005615)|haptoglobin-hemoglobin complex (GO:0031838)|hemoglobin complex (GO:0005833)|intracellular anatomical structure (GO:0005622)|protein-containing complex (GO:0032991)		Factors involved in megakaryocyte development and platelet production (WP1815)	DOWN	-	-	-	DOWN	-	P1	-0.164188	-0.198679	-0.835614	-0.0807631	-0.492452	-0.347213	0.135773	-0.70203	-0.794467	-0.449176	0.873525	0.312602	-0.529339	0.384087	-0.005527	-0.540328	0.331797	0.154984	-0.481279	-0.0426288	-0.336999	-0.712244	-0.179252	-0.703408	-0.979238	-0.736435	-0.0773486	-0.543738	-1.25483	0.296448	-0.294061	-0.172449	-0.0246621	1.16499	0.530832	-1.12153
HMGCR	3-hydroxy-3-methylglutaryl-CoA reductase	alcohol biosynthetic process (GO:0046165)|alcohol metabolic process (GO:0006066)|amide transport (GO:0042886)|amyloid-beta clearance (GO:0097242)|anion transport (GO:0006820)|biological regulation (GO:0065007)|biological_process (GO:0008150)|biosynthetic process (GO:0009058)|carbohydrate derivative metabolic process (GO:1901135)|catabolic process (GO:0009056)|cellular aromatic compound metabolic …	adenyl nucleotide binding (GO:0030554)|adenyl ribonucleotide binding (GO:0032559)|anion binding (GO:0043168)|binding (GO:0005488)|carbohydrate derivative binding (GO:0097367)|catalytic activity (GO:0003824)|coenzyme A binding (GO:0120225)|heterocyclic compound binding (GO:1901363)|hydroxymethylglutaryl-CoA reductase (NADPH) activity (GO:0004420)|hydroxymethylglutaryl-CoA reductase activity (GO:00…	bounding membrane of organelle (GO:0098588)|cellular anatomical entity (GO:0110165)|cellular_component (GO:0005575)|cytoplasm (GO:0005737)|endomembrane system (GO:0012505)|endoplasmic reticulum (GO:0005783)|endoplasmic reticulum membrane (GO:0005789)|endoplasmic reticulum subcompartment (GO:0098827)|integral component of membrane (GO:0016021)|intracellular anatomical structure (GO:0005622)|intrac…	hsa00900 Terpenoid backbone biosynthesis|hsa01100 Metabolic pathways|hsa04152 AMPK signaling pathway|hsa04976 Bile secretion	Activation of gene expression by SREBF (SREBP) (WP2706)|AMP-activated protein kinase (AMPK) signaling (WP1403)|Cholesterol biosynthesis pathway (WP197)|Cholesterol biosynthesis pathway. (WP5226)|Cholesterol metabolism with Bloch and Kandutsch-Russell pathways (WP4718)|Cholesterol synthesis disorders (WP5193)|Demo (WP3590)|Demo_complete (WP3418)|EGR2 and SOX10-mediated initiation of Schwann cell m…	DOWN	-	-	-	DOWN	DOWN	P1	-1.22032	-1.2403	-0.780499	-0.466239	-1.15971	-0.694045	-1.14875	-0.922918	-1.99396	-0.205852	-0.674532	-0.79734	0.116039	-0.670631	0.461387	-0.82033	-0.0515855	-0.68904	-0.901814	0.313511	-1.15356	-1.06964	-0.705728	-0.45187	-0.87139	-0.214455	-1.72253	-0.761339	-1.27846	-0.0416821	-0.819344	-0.0945815	-0.814879	-0.614121	-0.911035	-1.20758
HMGCS1	3-hydroxy-3-methylglutaryl-CoA synthase 1	acetyl-CoA metabolic process (GO:0006084)|acyl-CoA metabolic process (GO:0006637)|alcohol biosynthetic process (GO:0046165)|alcohol metabolic process (GO:0006066)|anatomical structure development (GO:0048856)|animal organ development (GO:0048513)|biological regulation (GO:0065007)|biological_process (GO:0008150)|biosynthetic process (GO:0009058)|brain development (GO:0007420)|carbohydrate derivat…	binding (GO:0005488)|catalytic activity (GO:0003824)|drug binding (GO:0008144)|hydroxymethylglutaryl-CoA synthase activity (GO:0004421)|identical protein binding (GO:0042802)|isomerase activity (GO:0016853)|molecular_function (GO:0003674)|organic acid binding (GO:0043177)|protein binding (GO:0005515)|protein dimerization activity (GO:0046983)|protein homodimerization activity (GO:0042803)|small m…	cellular anatomical entity (GO:0110165)|cellular_component (GO:0005575)|cytoplasm (GO:0005737)|cytosol (GO:0005829)|intracellular anatomical structure (GO:0005622)	hsa00280 Valine, leucine and isoleucine degradation|hsa00650 Butanoate metabolism|hsa00900 Terpenoid backbone biosynthesis|hsa01100 Metabolic pathways|hsa03320 PPAR signaling pathway	Activation of gene expression by SREBF (SREBP) (WP2706)|Cholesterol biosynthesis (WP1795)|Cholesterol biosynthesis pathway (WP197)|Cholesterol biosynthesis pathway. (WP5226)|Cholesterol biosynthesis, regulation and transport (WP4281)|Cholesterol metabolism with Bloch and Kandutsch-Russell pathways (WP4718)|Cholesterol synthesis disorders (WP5193)|Disorders in ketolysis (WP5195)|Endochondral ossif…	DOWN	-	DOWN	-	-	DOWN	P1	-0.978363	-1.50917	-1.21386	-0.591535	-1.28536	-0.976609	-0.363345	-1.1089	-1.53175	0.202554	0.0621733	-0.480559	-0.8515	-0.633007	0.145596	-0.700865	-0.862315	-0.960881	-0.591172	-1.35372	-0.690333	-1.72483	-0.957922	-0.924882	-1.6323	-0.487401	-1.33224	-1.96792	0.393222	0.449813	-0.938765	-0.46713	-0.761998	-0.381601	-1.09594	-0.949897
IDI1	isopentenyl-diphosphate delta isomerase 1	alcohol biosynthetic process (GO:0046165)|alcohol metabolic process (GO:0006066)|biological regulation (GO:0065007)|biological_process (GO:0008150)|biosynthetic process (GO:0009058)|cellular biosynthetic process (GO:0044249)|cellular lipid metabolic process (GO:0044255)|cellular metabolic process (GO:0044237)|cellular process (GO:0009987)|cholesterol biosynthetic process (GO:0006695)|cholesterol …	binding (GO:0005488)|catalytic activity (GO:0003824)|cation binding (GO:0043169)|hydrolase activity (GO:0016787)|intramolecular oxidoreductase activity (GO:0016860)|intramolecular oxidoreductase activity, transposing C=C bonds (GO:0016863)|ion binding (GO:0043167)|isomerase activity (GO:0016853)|isopentenyl-diphosphate delta-isomerase activity (GO:0004452)|metal ion binding (GO:0046872)|molecular…	cellular anatomical entity (GO:0110165)|cellular_component (GO:0005575)|cytoplasm (GO:0005737)|cytosol (GO:0005829)|intracellular anatomical structure (GO:0005622)|intracellular membrane-bounded organelle (GO:0043231)|intracellular organelle (GO:0043229)|membrane-bounded organelle (GO:0043227)|microbody (GO:0042579)|organelle (GO:0043226)|peroxisome (GO:0005777)	hsa00900 Terpenoid backbone biosynthesis|hsa01100 Metabolic pathways	Activation of gene expression by SREBF (SREBP) (WP2706)|Cholesterol biosynthesis (WP1795)|Cholesterol biosynthesis pathway (WP197)|Cholesterol biosynthesis pathway. (WP5226)|Cholesterol biosynthesis, regulation and transport (WP4281)|Cholesterol metabolism with Bloch and Kandutsch-Russell pathways (WP4718)|Cholesterol synthesis disorders (WP5193)|Exercise-induced circadian regulation (WP410)|Meva…	DOWN	-	DOWN	-	DOWN	DOWN	P1	-0.951806	-1.47467	-0.876426	-0.137089	-0.738474	-0.985561	-0.927063	-1.04913	-1.35457	-0.693649	-0.192828	-0.842489	-0.471122	-0.370916	-0.533778	-1.09467	-0.737316	-0.36506	-0.759912	-0.229956	-1.90042	-1.05594	-1.36203	-1.24681	-1.17584	0.314573	-1.62821	-1.72435	-1.43738	0.114926	-1.0523	-0.537414	-1.48366	-0.911036	-0.789611	-1.1564
INSL3	insulin like 3	adenylate cyclase-inhibiting G protein-coupled receptor signaling pathway (GO:0007193)|adenylate cyclase-modulating G protein-coupled receptor signaling pathway (GO:0007188)|ameboidal-type cell migration (GO:0001667)|biological regulation (GO:0065007)|biological_process (GO:0008150)|cell-cell signaling (GO:0007267)|cell communication (GO:0007154)|cell migration (GO:0016477)|cell motility (GO:0048…	binding (GO:0005488)|enzyme binding (GO:0019899)|G protein-coupled receptor binding (GO:0001664)|hormone activity (GO:0005179)|insulin receptor binding (GO:0005158)|molecular function regulator (GO:0098772)|molecular_function (GO:0003674)|protease binding (GO:0002020)|protein-containing complex binding (GO:0044877)|protein binding (GO:0005515)|receptor ligand activity (GO:0048018)|receptor regula…	cellular anatomical entity (GO:0110165)|cellular_component (GO:0005575)|extracellular region (GO:0005576)|extracellular space (GO:0005615)	hsa04080 Neuroactive ligand-receptor interaction|hsa04926 Relaxin signaling pathway	Anti-inflammatory response favouring Leishmania parasite infection (WP4993)|Class A/1 (rhodopsin-like receptors) (WP4419)|G alpha (s) signaling events (WP4427)|Mammalian disorder of sexual development (WP4842)|MET in type 1 papillary renal cell carcinoma (WP4205)	DOWN	-	-	-	-	DOWN	P1	-1.31582	-1.28664	-0.389698	-0.306997	-0.334524	-0.342539	-1.04126	-1.33512	-1.30846	-0.642976	-1.15579	-0.619997	-0.431702	-1.48158	-0.626082	-0.616072	0.11643	-0.0903349	0.0238653	-0.680517	-1.43761	0.0387653	-2.49014	0.903141	-0.535949	-1.14909	-2.03487	-1.40111	-0.426798	-0.834374	-0.38716	-0.0693509	-1.51452	-1.85209	-1.22064	-0.618159
MSMO1	methylsterol monooxygenase 1	alcohol biosynthetic process (GO:0046165)|alcohol metabolic process (GO:0006066)|biological_process (GO:0008150)|biosynthetic process (GO:0009058)|carboxylic acid metabolic process (GO:0019752)|cellular lipid metabolic process (GO:0044255)|cellular metabolic process (GO:0044237)|cellular process (GO:0009987)|cholesterol biosynthetic process (GO:0006695)|cholesterol metabolic process (GO:0008203)|…	binding (GO:0005488)|C-4 methylsterol oxidase activity (GO:0000254)|catalytic activity (GO:0003824)|cation binding (GO:0043169)|ion binding (GO:0043167)|iron ion binding (GO:0005506)|metal ion binding (GO:0046872)|molecular_function (GO:0003674)|monooxygenase activity (GO:0004497)|oxidoreductase activity (GO:0016491)|oxidoreductase activity, acting on paired donors, with incorporation or reductio…	cell periphery (GO:0071944)|cellular anatomical entity (GO:0110165)|cellular_component (GO:0005575)|cytoplasm (GO:0005737)|endomembrane system (GO:0012505)|endoplasmic reticulum (GO:0005783)|endoplasmic reticulum membrane (GO:0005789)|endoplasmic reticulum subcompartment (GO:0098827)|integral component of membrane (GO:0016021)|intracellular anatomical structure (GO:0005622)|intracellular membrane…	hsa00100 Steroid biosynthesis|hsa01100 Metabolic pathways	Cholesterol biosynthesis (WP1795)|Cholesterol biosynthesis pathway (WP197)|Cholesterol biosynthesis pathway. (WP5226)|Cholesterol metabolism with Bloch and Kandutsch-Russell pathways (WP4718)|Cholesterol synthesis disorders (WP5193)|WikiPathways Academy: met-1-last (WP3907)|WikiPathways Academy: wp-publish test (WP3917)	DOWN	DOWN	-	-	DOWN	DOWN	P1	-1.33261	-1.26597	-0.798194	-0.287832	-1.88778	-0.903128	-0.916089	-1.17013	-1.84952	-0.825634	-0.88827	-0.292774	-0.548105	0.297597	-0.488436	-0.501026	-0.381468	-0.0732881	-1.00776	-0.527428	-1.21987	-1.57957	-2.5495	-0.937712	-1.23622	0.0224969	-1.95693	-0.976624	-1.22751	-0.261813	-1.06889	-1.12407	-1.38642	-0.987719	-0.798901	-1.04248
NSDHL	NAD(P) dependent steroid dehydrogenase-like	alcohol biosynthetic process (GO:0046165)|alcohol metabolic process (GO:0006066)|anatomical structure development (GO:0048856)|animal organ development (GO:0048513)|biological regulation (GO:0065007)|biological_process (GO:0008150)|biosynthetic process (GO:0009058)|blood vessel development (GO:0001568)|cell communication (GO:0007154)|cell surface receptor signaling pathway (GO:0007166)|cellular p…	3-beta-hydroxy-delta5-steroid dehydrogenase activity (GO:0003854)|4alpha-carboxy-4beta-methyl-5alpha-cholesta-8-en-3beta-ol:NAD(P)+ 3-oxidoreductase (decarboxylating) activity (GO:0103066)|4alpha-carboxy-5alpha-cholesta-8-en-3beta-ol:NAD(P)+ 3-dehydrogenase (decarboxylating) activity (GO:0103067)|binding (GO:0005488)|C-3 sterol dehydrogenase (C-4 sterol decarboxylase) activity (GO:0000252)|cataly…	cellular anatomical entity (GO:0110165)|cellular_component (GO:0005575)|cytoplasm (GO:0005737)|endomembrane system (GO:0012505)|endoplasmic reticulum (GO:0005783)|endoplasmic reticulum membrane (GO:0005789)|endoplasmic reticulum subcompartment (GO:0098827)|integral component of membrane (GO:0016021)|intracellular anatomical structure (GO:0005622)|intracellular membrane-bounded organelle (GO:00432…	hsa00100 Steroid biosynthesis|hsa01100 Metabolic pathways	Cholesterol biosynthesis (WP1795)|Cholesterol biosynthesis pathway (WP197)|Cholesterol biosynthesis pathway. (WP5226)|Cholesterol biosynthesis with skeletal dysplasias (WP4804)|Cholesterol metabolism with Bloch and Kandutsch-Russell pathways (WP4718)|WikiPathways Academy: met-1-last (WP3907)|WikiPathways Academy: wp-publish test (WP3917)	DOWN	-	-	-	DOWN	-	P1	-0.223798	-0.793654	-0.14184	-0.589171	-1.12663	-0.846073	-0.786844	-0.26738	-0.312628	-0.0332844	-0.814891	-0.396697	0.0384661	-0.428455	0.099229	0.0435188	-0.262027	0.176392	0.403677	0.26085	-0.97279	-0.486306	-1.32472	-0.848209	-0.907225	-0.321458	-0.479975	-0.423291	-0.936045	-0.790598	-1.20474	-0.465736	-0.354997	-0.280999	-0.54926	-0.762088
OLFML3	olfactomedin like 3	anatomical structure development (GO:0048856)|biological_process (GO:0008150)|developmental process (GO:0032502)|multicellular organism development (GO:0007275)|multicellular organismal process (GO:0032501)		cellular anatomical entity (GO:0110165)|cellular_component (GO:0005575)|extracellular organelle (GO:0043230)|extracellular region (GO:0005576)|extracellular vesicle (GO:1903561)|membrane-bounded organelle (GO:0043227)|organelle (GO:0043226)|vesicle (GO:0031982)			DOWN	-	-	-	-	-	P1	-0.863884	-0.145351	-0.473985	-0.390672	-0.284675	-0.389374	0.0371474	-0.57371	-0.962308	-0.292855	0.00366706	0.065726	-0.0790943	-0.574512	-0.731775	-0.488815	-0.435222	-0.219854	-0.33133	0.430576	-1.62915	-1.58451	-0.461371	0.236893	-0.112644	-0.215442	-0.716788	-0.830786	-1.03531	-0.242532	-0.352837	0.00285296	-0.461531	-0.20986	-0.297584	-0.119554
S100A13	S100 calcium binding protein A13	amide transport (GO:0042886)|anatomical structure development (GO:0048856)|anatomical structure morphogenesis (GO:0009653)|anion transport (GO:0006820)|biological regulation (GO:0065007)|biological_process (GO:0008150)|cell activation (GO:0001775)|cell activation involved in immune response (GO:0002263)|cell communication (GO:0007154)|cell morphogenesis (GO:0000902)|cell population proliferation …	binding (GO:0005488)|calcium-dependent protein binding (GO:0048306)|calcium ion binding (GO:0005509)|cation binding (GO:0043169)|copper ion binding (GO:0005507)|fibroblast growth factor binding (GO:0017134)|growth factor binding (GO:0019838)|identical protein binding (GO:0042802)|ion binding (GO:0043167)|lipid binding (GO:0008289)|metal ion binding (GO:0046872)|molecular_function (GO:0003674)|pro…	cell periphery (GO:0071944)|cellular anatomical entity (GO:0110165)|cellular_component (GO:0005575)|cytoplasm (GO:0005737)|cytosol (GO:0005829)|extracellular region (GO:0005576)|extracellular space (GO:0005615)|intracellular anatomical structure (GO:0005622)|intracellular membrane-bounded organelle (GO:0043231)|intracellular non-membrane-bounded organelle (GO:0043232)|intracellular organelle (GO:…			DOWN	-	-	-	-	-	P1	-0.377326	-0.828499	-0.178719	0.147465	-0.320654	-0.282525	-0.663396	-0.582701	-0.607636	-0.727412	-0.0841511	-0.310507	0.0337672	0.321735	0.0280785	-0.381735	0.549317	-0.135033	-1.02536	-0.27291	-0.409866	-0.751074	-1.25051	-0.546456	0.670455	0.348454	-1.0591	-0.702457	-0.444307	-0.42941	0.0780452	0.427586	-0.664951	-0.261775	-0.298497	-0.102392
ELOVL6	ELOVL fatty acid elongase 6	acyl-CoA biosynthetic process (GO:0071616)|acyl-CoA metabolic process (GO:0006637)|adaptive thermogenesis (GO:1990845)|alcohol biosynthetic process (GO:0046165)|alcohol metabolic process (GO:0006066)|amide biosynthetic process (GO:0043604)|aromatic compound biosynthetic process (GO:0019438)|biological regulation (GO:0065007)|biological_process (GO:0008150)|biosynthetic process (GO:0009058)|carboh…	3-oxo-arachidoyl-CoA synthase activity (GO:0102336)|3-oxo-cerotoyl-CoA synthase activity (GO:0102337)|3-oxo-lignoceronyl-CoA synthase activity (GO:0102338)|binding (GO:0005488)|catalytic activity (GO:0003824)|fatty acid elongase activity (GO:0009922)|fatty acid synthase activity (GO:0004312)|molecular_function (GO:0003674)|protein binding (GO:0005515)|transferase activity (GO:0016740)|transferase…	catalytic complex (GO:1902494)|cellular anatomical entity (GO:0110165)|cellular_component (GO:0005575)|cytoplasm (GO:0005737)|endomembrane system (GO:0012505)|endoplasmic reticulum (GO:0005783)|endoplasmic reticulum membrane (GO:0005789)|endoplasmic reticulum protein-containing complex (GO:0140534)|endoplasmic reticulum subcompartment (GO:0098827)|fatty acid elongase complex (GO:0009923)|integral…	hsa00062 Fatty acid elongation|hsa01040 Biosynthesis of unsaturated fatty acids|hsa01100 Metabolic pathways|hsa01212 Fatty acid metabolism	Activation of gene expression by SREBF (SREBP) (WP2706)|Fatty acyl-CoA biosynthesis (WP4114)|Omega-9 fatty acid synthesis (WP4724)	-	-	DOWN	-	-	-	P1	-0.18237	-0.637408	-0.0533802	-0.0251803	0.458176	-0.537316	-0.510653	0.135595	-0.5057	-1.45588	-0.0292297	-0.649699	-0.533223	-0.853774	-0.339882	-0.442579	-1.25497	-0.580579	-0.442341	-0.352528	-0.462351	-0.672148	0.271288	-0.469351	-1.41794	-0.136059	0.76552	-1.50014	0.341422	0.159246	1.05021	-0.463003	1.26215	0.595219	-0.433887	-0.0565809
TXNIP	thioredoxin interacting protein	amide transport (GO:0042886)|anatomical structure development (GO:0048856)|animal organ development (GO:0048513)|anion transport (GO:0006820)|apoptotic process (GO:0006915)|aromatic compound biosynthetic process (GO:0019438)|biological regulation (GO:0065007)|biological_process (GO:0008150)|biosynthetic process (GO:0009058)|cell communication (GO:0007154)|cell cycle (GO:0007049)|cell death (GO:00…	binding (GO:0005488)|enzyme binding (GO:0019899)|enzyme inhibitor activity (GO:0004857)|enzyme regulator activity (GO:0030234)|molecular function regulator (GO:0098772)|molecular_function (GO:0003674)|protein binding (GO:0005515)|ubiquitin-like protein ligase binding (GO:0044389)|ubiquitin protein ligase binding (GO:0031625)	cellular anatomical entity (GO:0110165)|cellular_component (GO:0005575)|cytoplasm (GO:0005737)|cytosol (GO:0005829)|envelope (GO:0031975)|intracellular anatomical structure (GO:0005622)|intracellular membrane-bounded organelle (GO:0043231)|intracellular organelle (GO:0043229)|intracellular organelle lumen (GO:0070013)|membrane-bounded organelle (GO:0043227)|membrane-enclosed lumen (GO:0031974)|mi…	hsa04621 NOD-like receptor signaling pathway	Cell recruitment (pro-inflammatory response) (WP4998)|FOXO-mediated transcription (WP5008)|Nucleotide-binding domain, leucine rich repeat containing receptor (NLR) signaling pathways (WP2763)|Unfolded protein response (WP4925)|VEGFA-VEGFR2 signaling pathway (WP3888)	-	-	DOWN	-	-	-	P1	-0.759374	-0.11226	0.299892	-0.0147886	-0.0555793	-0.0532358	-0.621884	-0.640222	-0.0363006	-0.443796	-0.418669	-0.471108	-0.647249	-0.102833	-0.560038	-0.342537	-0.141893	-0.478662	-1.04827	-1.35803	-0.505398	-0.524301	-0.944234	-0.704272	-0.271078	0.0876149	-0.418521	0.281552	0.225308	0.190633	-0.269405	-0.532157	-0.177443	-0.790763	-0.884355	-0.370676
CDCA5	cell division cycle associated 5	biological regulation (GO:0065007)|biological_process (GO:0008150)|cell cycle (GO:0007049)|cell cycle phase transition (GO:0044770)|cell cycle process (GO:0022402)|cell division (GO:0051301)|cellular aromatic compound metabolic process (GO:0006725)|cellular component organization (GO:0016043)|cellular component organization or biogenesis (GO:0071840)|cellular localization (GO:0051641)|cellular ma…	binding (GO:0005488)|chromatin binding (GO:0003682)|molecular_function (GO:0003674)|protein-containing complex binding (GO:0044877)|protein binding (GO:0005515)	cellular anatomical entity (GO:0110165)|cellular_component (GO:0005575)|chromatin (GO:0000785)|chromosomal region (GO:0098687)|chromosome (GO:0005694)|chromosome, centromeric region (GO:0000775)|cytoplasm (GO:0005737)|cytosol (GO:0005829)|intracellular anatomical structure (GO:0005622)|intracellular membrane-bounded organelle (GO:0043231)|intracellular non-membrane-bounded organelle (GO:0043232)|…	hsa05206 MicroRNAs in cancer	Cohesin complex - Cornelia de Lange syndrome (WP5117)|Mitotic Metaphase and Anaphase (WP2757)|Mitotic Prometaphase (WP2652)|S Phase (WP2772)	-	-	-	-	DOWN	-	P1	-0.250435	0.264071	-0.039242	-0.412378	-0.279326	0.0625071	0.144388	-0.0178406	0.53241	-0.809386	-0.462526	0.308459	0.158512	-0.240329	-0.0086815	-0.228205	0.300764	0.0884636	-0.140143	0.1069	-0.98491	0.124406	-1.05912	-0.83737	-0.360059	-0.49726	-0.807125	-0.755249	-0.551466	0.555906	-0.574061	0.363438	-0.875089	-0.280022	-0.232242	0.352592
FATE1	fetal and adult testis expressed 1	apoptotic process (GO:0006915)|biological regulation (GO:0065007)|biological_process (GO:0008150)|calcium ion homeostasis (GO:0055074)|cation homeostasis (GO:0055080)|cell death (GO:0008219)|cellular calcium ion homeostasis (GO:0006874)|cellular cation homeostasis (GO:0030003)|cellular chemical homeostasis (GO:0055082)|cellular divalent inorganic cation homeostasis (GO:0072503)|cellular homeostas…	binding (GO:0005488)|enzyme binding (GO:0019899)|identical protein binding (GO:0042802)|molecular_function (GO:0003674)|protein binding (GO:0005515)|ubiquitin-like protein ligase binding (GO:0044389)|ubiquitin protein ligase binding (GO:0031625)	bounding membrane of organelle (GO:0098588)|cellular anatomical entity (GO:0110165)|cellular_component (GO:0005575)|cytoplasm (GO:0005737)|endomembrane system (GO:0012505)|endoplasmic reticulum (GO:0005783)|endoplasmic reticulum membrane (GO:0005789)|endoplasmic reticulum subcompartment (GO:0098827)|envelope (GO:0031975)|integral component of membrane (GO:0016021)|intracellular anatomical structu…			-	-	-	-	DOWN	-	P1	-0.269644	-0.637174	-0.465306	0.0157825	-0.0314766	-0.132156	-0.103225	0.189593	-0.266596	-0.783809	-0.310453	-0.373891	0.0952355	0.127136	-1.1754	-0.319036	0.267815	-0.621707	0.264418	0.0437485	-0.32186	-0.250473	-0.351751	-0.475816	-0.223337	-0.413866	-1.03158	-0.367882	-0.59174	0.401339	-0.694506	-0.0683711	-0.835576	0.0582284	-0.709711	-0.383874
RGS5	regulator of G protein signaling 5	biological regulation (GO:0065007)|biological_process (GO:0008150)|cell communication (GO:0007154)|cellular process (GO:0009987)|cellular response to stimulus (GO:0051716)|G protein-coupled receptor signaling pathway (GO:0007186)|negative regulation of biological process (GO:0048519)|negative regulation of cell communication (GO:0010648)|negative regulation of cellular process (GO:0048523)|negati…	binding (GO:0005488)|catalytic activity (GO:0003824)|enzyme activator activity (GO:0008047)|enzyme regulator activity (GO:0030234)|GTPase activator activity (GO:0005096)|GTPase activity (GO:0003924)|GTPase regulator activity (GO:0030695)|hydrolase activity (GO:0016787)|hydrolase activity, acting on acid anhydrides (GO:0016817)|hydrolase activity, acting on acid anhydrides, in phosphorus-containin…	cell periphery (GO:0071944)|cellular anatomical entity (GO:0110165)|cellular_component (GO:0005575)|cytoplasm (GO:0005737)|intracellular anatomical structure (GO:0005622)|membrane (GO:0016020)|plasma membrane (GO:0005886)		Calcium regulation in cardiac cells (WP536)|G alpha (i) signaling events (WP4423)|G alpha (q) signaling events (WP4424)|Myometrial relaxation and contraction pathways (WP289)	-	-	-	-	DOWN	-	P1	-0.224697	-0.796032	-0.983934	-0.646424	0.138034	-0.0871625	-0.397566	-0.24197	-1.4212	0.234001	0.927373	-0.0425125	0.0230302	0.112244	-0.409026	0.745814	-1.32058	0.652871	1.12029	-1.76401	-1.23923	-0.685216	-0.479842	-0.571442	-0.751069	-0.694769	-0.782464	-0.218146	-0.38024	0.964519	-1.19069	-0.876039	-1.14538	-0.514114	-0.0328737	-0.944598
TUBA1A	tubulin alpha 1a	biological regulation (GO:0065007)|biological_process (GO:0008150)|cell cycle (GO:0007049)|cell cycle G2/M phase transition (GO:0044839)|cell cycle phase transition (GO:0044770)|cell cycle process (GO:0022402)|cell division (GO:0051301)|cell junction organization (GO:0034330)|cell projection assembly (GO:0030031)|cell projection organization (GO:0030030)|cellular component assembly (GO:0022607)|c…	anion binding (GO:0043168)|binding (GO:0005488)|carbohydrate derivative binding (GO:0097367)|catalytic activity (GO:0003824)|GTP binding (GO:0005525)|GTPase activity (GO:0003924)|guanyl nucleotide binding (GO:0019001)|guanyl ribonucleotide binding (GO:0032561)|heterocyclic compound binding (GO:1901363)|hydrolase activity (GO:0016787)|hydrolase activity, acting on acid anhydrides (GO:0016817)|hydr…	cell junction (GO:0030054)|cellular anatomical entity (GO:0110165)|cellular_component (GO:0005575)|cytoplasm (GO:0005737)|cytoplasmic microtubule (GO:0005881)|cytoplasmic ribonucleoprotein granule (GO:0036464)|cytoplasmic vesicle (GO:0031410)|cytoskeleton (GO:0005856)|cytosol (GO:0005829)|endomembrane system (GO:0012505)|endosome (GO:0005768)|extracellular exosome (GO:0070062)|extracellular organ…	hsa04145 Phagosome|hsa04210 Apoptosis|hsa04530 Tight junction|hsa04540 Gap junction|hsa05010 Alzheimer disease|hsa05012 Parkinson disease|hsa05014 Amyotrophic lateral sclerosis|hsa05016 Huntington disease|hsa05020 Prion disease|hsa05022 Pathways of neurodegeneration - multiple diseases|hsa05130 Pathogenic Escherichia coli infection|hsa05132 Salmonella infection	Alzheimer's disease (WP5124)|Alzheimer's disease and miRNA effects (WP2059)|Assembly of the primary cilium (WP3498)|Carboxyterminal post-translational modifications of tubulin (WP4075)|Cilium Assembly (WP4124)|miR-targeted genes in epithelium (WP2002)|miR-targeted genes in leukocytes (WP2003)|miR-targeted genes in lymphocytes (WP2004)|miR-targeted genes in squamous cell (WP2006)|Mitotic G2-G2/M p…	-	-	-	-	DOWN	-	P1	-0.00091557	-0.224125	-0.37626	0.0984304	0.00321657	-0.0617275	-0.0148379	-0.0633512	-0.288845	-0.159081	0.296975	-0.404984	-0.283068	-0.225209	-0.493862	-0.230871	-0.271192	-0.0134014	-0.137314	-0.339142	-0.512125	-0.631757	-0.0418261	-0.362355	-0.164479	-0.246061	-0.302101	-0.270243	-0.654128	0.0511695	0.0703929	-0.0985041	-0.0389708	-0.062339	-0.474722	0.0236546
ACTA2	actin alpha 2, smooth muscle	anatomical structure development (GO:0048856)|anatomical structure morphogenesis (GO:0009653)|animal organ development (GO:0048513)|animal organ morphogenesis (GO:0009887)|aromatic compound biosynthetic process (GO:0019438)|biological process involved in interspecies interaction between organisms (GO:0044419)|biological regulation (GO:0065007)|biological_process (GO:0008150)|biosynthetic process …	adenyl nucleotide binding (GO:0030554)|adenyl ribonucleotide binding (GO:0032559)|anion binding (GO:0043168)|ATP binding (GO:0005524)|binding (GO:0005488)|carbohydrate derivative binding (GO:0097367)|enzyme binding (GO:0019899)|heterocyclic compound binding (GO:1901363)|ion binding (GO:0043167)|kinase binding (GO:0019900)|molecular_function (GO:0003674)|nucleoside phosphate binding (GO:1901265)|n…	actin-based cell projection (GO:0098858)|actin cytoskeleton (GO:0015629)|cell body (GO:0044297)|cell leading edge (GO:0031252)|cell projection (GO:0042995)|cellular anatomical entity (GO:0110165)|cellular_component (GO:0005575)|contractile fiber (GO:0043292)|cytoplasm (GO:0005737)|cytoskeleton (GO:0005856)|cytosol (GO:0005829)|dynactin complex (GO:0005869)|extracellular exosome (GO:0070062)|extra…	hsa04270 Vascular smooth muscle contraction|hsa04371 Apelin signaling pathway|hsa04926 Relaxin signaling pathway	22q11.2 copy number variation syndrome (WP4657)|Angiotensin II receptor type 1 pathway (WP5036)|AXL signaling pathway (WP4847)|CCL18 signaling pathway (WP5097)|Endothelin pathway (WP4857)|Genotoxicity pathway (WP4286)|IL-18 signaling pathway (WP4754)|Malignant pleural mesothelioma (WP5087)|Mechanoregulation and pathology of YAP/TAZ via Hippo and non-Hippo mechanisms (WP4534)|Myometrial relaxation…	-	-	-	-	-	DOWN	P1	-0.637736	-0.637709	-0.674979	-0.757557	-1.40697	-0.519353	-0.028299	-0.133878	-1.28842	0.532414	-0.269456	-1.87009	-0.864677	-0.591498	-0.204454	-0.0943403	-0.675524	-0.810424	-0.0263493	-0.17246	-1.2693	-1.54265	-0.378807	-1.47368	-1.21852	0.827959	-1.16771	-1.05467	-1.71517	0.51748	-0.729027	-1.62102	-1.33245	-1.14646	-2.26771	-0.201388
TSPAN7	tetraspanin 7	biological process involved in interspecies interaction between organisms (GO:0044419)|biological process involved in symbiotic interaction (GO:0044403)|biological_process (GO:0008150)|viral process (GO:0016032)	binding (GO:0005488)|molecular_function (GO:0003674)|protein binding (GO:0005515)	cell periphery (GO:0071944)|cellular anatomical entity (GO:0110165)|cellular_component (GO:0005575)|integral component of membrane (GO:0016021)|integral component of plasma membrane (GO:0005887)|intrinsic component of membrane (GO:0031224)|intrinsic component of plasma membrane (GO:0031226)|membrane (GO:0016020)|plasma membrane (GO:0005886)	hsa05202 Transcriptional misregulation in cancer	Cell surface interactions at the vascular wall (WP1794)|Glutamate binding, activation of AMPA receptors and synaptic plasticity (WP4459)	-	-	-	-	-	DOWN	P1	-0.27003	0.026538	0.0482587	0.280417	-0.241815	-0.58837	-0.576563	-0.779236	0.33917	0.134935	-0.781983	-0.217333	-0.809673	-0.633705	0.616223	-0.634403	-0.0227536	-0.183661	0.557712	0.11036	-0.747341	-0.659669	-0.597078	-0.748633	-0.373474	0.288305	-0.327416	-0.731657	-0.990021	0.317043	-0.953566	0.0837932	-1.01758	-0.49618	0.390875	-0.090053
ACLY	ATP citrate lyase	acetyl-CoA biosynthetic process (GO:0006085)|acetyl-CoA metabolic process (GO:0006084)|acyl-CoA biosynthetic process (GO:0071616)|acyl-CoA metabolic process (GO:0006637)|alcohol biosynthetic process (GO:0046165)|alcohol metabolic process (GO:0006066)|amide biosynthetic process (GO:0043604)|aromatic compound biosynthetic process (GO:0019438)|biological regulation (GO:0065007)|biological_process (G…	adenyl nucleotide binding (GO:0030554)|adenyl ribonucleotide binding (GO:0032559)|anion binding (GO:0043168)|ATP binding (GO:0005524)|ATP citrate synthase activity (GO:0003878)|binding (GO:0005488)|carbohydrate derivative binding (GO:0097367)|catalytic activity (GO:0003824)|cation binding (GO:0043169)|heterocyclic compound binding (GO:1901363)|ion binding (GO:0043167)|metal ion binding (GO:004687…	azurophil granule (GO:0042582)|azurophil granule lumen (GO:0035578)|cell periphery (GO:0071944)|cellular anatomical entity (GO:0110165)|cellular_component (GO:0005575)|cytoplasm (GO:0005737)|cytoplasmic vesicle (GO:0031410)|cytoplasmic vesicle lumen (GO:0060205)|cytosol (GO:0005829)|endomembrane system (GO:0012505)|extracellular exosome (GO:0070062)|extracellular organelle (GO:0043230)|extracellu…	hsa00020 Citrate cycle (TCA cycle)|hsa01100 Metabolic pathways	Amino acid metabolism (WP3925)|Butyrate-induced histone acetylation (WP2366)|Clear cell renal cell carcinoma pathways (WP4018)|Fatty acid biosynthesis (WP357)|Fatty acyl-CoA biosynthesis (WP4114)|Integration of energy metabolism (WP1831)|Lipid metabolism pathway (WP3965)|Metabolic reprogramming in colon cancer (WP4290)|Metabolic reprogramming in pancreatic cancer (WP5220)|Neutrophil degranulation…	DOWN	-	-	-	-	-	P2	-0.731712	-1.50167	-0.711475	-0.228394	-0.130791	-0.650459	-0.817506	-0.319073	-0.623099	-0.670385	0.0845485	-0.204268	-0.180676	-0.188967	-0.0422998	-0.237713	-0.624357	-0.627146	-0.0241391	-0.108718	-0.683987	-0.159113	-0.0315209	-1.02021	-0.500255	-0.398068	-0.328304	-0.182388	0.52301	0.328578	-0.736217	-0.930942	-0.276455	-1.56536	-0.784783	-0.968158
ACTN1	actinin alpha 1	actin cytoskeleton organization (GO:0030036)|actin filament-based process (GO:0030029)|actin filament bundle assembly (GO:0051017)|actin filament bundle organization (GO:0061572)|actin filament network formation (GO:0051639)|actin filament organization (GO:0007015)|anatomical structure development (GO:0048856)|anatomical structure formation involved in morphogenesis (GO:0048646)|anatomical struct…	actin binding (GO:0003779)|actin filament binding (GO:0051015)|binding (GO:0005488)|calcium ion binding (GO:0005509)|cation binding (GO:0043169)|cell adhesion molecule binding (GO:0050839)|cytoskeletal protein binding (GO:0008092)|double-stranded RNA binding (GO:0003725)|heterocyclic compound binding (GO:1901363)|identical protein binding (GO:0042802)|integrin binding (GO:0005178)|ion binding (GO…	actin cytoskeleton (GO:0015629)|actin filament (GO:0005884)|actin filament bundle (GO:0032432)|actomyosin (GO:0042641)|anchoring junction (GO:0070161)|brush border (GO:0005903)|cell-cell contact zone (GO:0044291)|cell-cell junction (GO:0005911)|cell-substrate junction (GO:0030055)|cell junction (GO:0030054)|cell leading edge (GO:0031252)|cell periphery (GO:0071944)|cell projection (GO:0042995)|ce…	hsa04510 Focal adhesion|hsa04520 Adherens junction|hsa04530 Tight junction|hsa04670 Leukocyte transendothelial migration|hsa04810 Regulation of actin cytoskeleton|hsa05131 Shigellosis|hsa05146 Amoebiasis|hsa05203 Viral carcinogenesis|hsa05322 Systemic lupus erythematosus	Arrhythmogenic right ventricular cardiomyopathy (WP2118)|Cell junction organization (WP1793)|Ebola virus infection in host (WP4217)|Focal adhesion (WP306)|MFAP5 effect on permeability and motility of endothelial cells via cytoskeleton rearrangement (WP4560)|Regulation of actin cytoskeleton (WP51)|Syndecan interactions (WP2787)	DOWN	-	-	-	-	-	P2	-0.264101	-0.0151499	-0.0203493	-0.751286	-0.030531	-0.238306	-0.740819	-0.27799	-0.315997	-0.472494	-0.483319	-0.607227	-1.12336	-0.0275729	-0.893823	-0.270233	-0.202551	0.759548	0.254341	-0.234694	-0.483219	-0.305919	-0.0983543	0.479676	0.0612983	0.0149915	-0.0539787	-0.314706	0.164245	-0.156802	-0.188807	0.0979098	-0.114392	-0.22466	-0.861036	-0.192548
BST1	bone marrow stromal cell antigen 1	actin cytoskeleton organization (GO:0030036)|actin filament-based process (GO:0030029)|B cell activation (GO:0042113)|B cell proliferation (GO:0042100)|biological adhesion (GO:0022610)|biological regulation (GO:0065007)|biological_process (GO:0008150)|calcium-mediated signaling (GO:0019722)|cell-matrix adhesion (GO:0007160)|cell-substrate adhesion (GO:0031589)|cell activation (GO:0001775)|cell ac…	ADP-ribosyl cyclase activity (GO:0061811)|catalytic activity (GO:0003824)|cyclase activity (GO:0009975)|cyclic ADP-ribose hydrolase (GO:0061812)|hydrolase activity (GO:0016787)|hydrolase activity, acting on glycosyl bonds (GO:0016798)|hydrolase activity, hydrolyzing N-glycosyl compounds (GO:0016799)|lyase activity (GO:0016829)|molecular_function (GO:0003674)|NAD(P)+ nucleosidase activity (GO:0050…	anchored component of membrane (GO:0031225)|bounding membrane of organelle (GO:0098588)|cell periphery (GO:0071944)|cell projection (GO:0042995)|cell trailing edge (GO:0031254)|cellular anatomical entity (GO:0110165)|cellular_component (GO:0005575)|cytoplasm (GO:0005737)|cytoplasmic vesicle (GO:0031410)|cytoplasmic vesicle membrane (GO:0030659)|endomembrane system (GO:0012505)|extracellular exoso…	hsa00760 Nicotinate and nicotinamide metabolism|hsa01100 Metabolic pathways|hsa04970 Salivary secretion|hsa04972 Pancreatic secretion	NAD+ biosynthetic pathways (WP3645)|Neutrophil degranulation (WP4049)|Nicotinate metabolism (WP4097)|Post-translational modification: synthesis of GPI-anchored proteins (WP1887)	DOWN	-	-	-	-	-	P2	-0.551695	-0.0227402	-0.305705	-0.586737	-0.773779	0.0485895	-0.194457	-0.693179	-0.0190255	-0.588081	0.41255	0.476432	0.074301	-0.0421098	1.1127	-0.927513	0.0525366	0.0423184	0.347999	-0.0151654	0.409273	0.454025	-0.101896	-0.746141	0.0593769	0.0145318	-0.62792	0.00279502	0.16619	-0.284924	-0.185902	0.427919	-0.775546	-0.361152	0.0742031	0.79216
C12orf76	chromosome 12 open reading frame 76						DOWN	-	-	-	-	-	P2	-0.431724	-0.0237778	-0.0312977	-0.287111	-0.168336	-0.787794	-1.17922	-1.12404	-0.0207856	-0.574114	-0.37746	0.201352	0.386098	0.106049	0.063058	0.557853	0.236059	1.06377	-0.357457	0.629541	0.508528	0.0596115	0.182532	0.0959247	-0.265491	-0.893647	-0.134098	0.00304878	-0.130059	-0.176224	-0.195491	-0.114419	0.120101	-0.1076	0.0731447	-0.126969
C2orf27A	chromosome 2 open reading frame 27A						DOWN	-	-	-	-	-	P2	-0.777146	-0.648148	-0.787412	0.0852665	-0.921894	-0.279022	-0.373646	-0.0224517	-0.0435213	-0.686184	-0.0191226	0.125256	1.67081	0.433533	0.191921	0.110046	0.138723	0.0149735	0.455397	1.29084	0.0683814	0.928081	-0.579849	-0.812169	0.892978	-0.306649	0.47063	-0.636902	0.331289	0.101976	-1.16407	0.706572	0.573053	0.27968	-0.3646	-0.779967
C8orf33	chromosome 8 open reading frame 33		binding (GO:0005488)|molecular_function (GO:0003674)|protein binding (GO:0005515)				DOWN	-	-	-	-	-	P2	-0.827909	-0.239998	-0.320335	-0.850127	0.0931296	-0.796396	-0.258001	-0.183327	-1.00918	-0.496965	-0.187747	0.0786183	-0.229102	-0.220894	0.67964	-0.352944	-0.710452	0.281877	0.0877636	-0.821565	0.797659	0.250651	-0.78241	-0.0818598	-0.0253671	0.0654345	-0.899731	-0.223302	0.434265	0.771901	0.58326	-1.30673	-0.0240159	0.010575	0.486061	0.213174
COG4	component of oligomeric golgi complex 4	amide transport (GO:0042886)|anion transport (GO:0006820)|biological_process (GO:0008150)|cellular component assembly (GO:0022607)|cellular component biogenesis (GO:0044085)|cellular component organization (GO:0016043)|cellular component organization or biogenesis (GO:0071840)|cellular localization (GO:0051641)|cellular process (GO:0009987)|cellular protein-containing complex assembly (GO:0034622…	binding (GO:0005488)|molecular_function (GO:0003674)|protein binding (GO:0005515)	bounding membrane of organelle (GO:0098588)|cellular anatomical entity (GO:0110165)|cellular_component (GO:0005575)|cytoplasm (GO:0005737)|cytosol (GO:0005829)|endomembrane system (GO:0012505)|Golgi apparatus (GO:0005794)|Golgi apparatus subcompartment (GO:0098791)|Golgi membrane (GO:0000139)|Golgi transport complex (GO:0017119)|intracellular anatomical structure (GO:0005622)|intracellular membra…		COPI-mediated anterograde transport (WP4441)|Intra-Golgi and retrograde Golgi-to-ER traffic (WP3842)	DOWN	-	-	-	-	-	P2	-0.780935	-0.449491	-0.816802	-0.588193	0.165643	0.221298	-0.182024	-0.406093	-0.302555	-0.878723	0.0806322	0.625578	-0.492267	0.0285357	-0.495079	-1.05827	-0.562189	0.314195	0.500752	1.01845	-0.770431	-0.830059	0.12601	-0.515182	-0.904315	0.843585	0.245605	0.00850075	-0.406472	0.661312	-1.11466	-0.30544	-0.349295	-0.696866	1.03238	-0.0528811
DACT1	dishevelled binding antagonist of beta catenin 1	anatomical structure development (GO:0048856)|anatomical structure morphogenesis (GO:0009653)|animal organ development (GO:0048513)|animal organ morphogenesis (GO:0009887)|aromatic compound biosynthetic process (GO:0019438)|beta-catenin-TCF complex assembly (GO:1904837)|biological regulation (GO:0065007)|biological_process (GO:0008150)|biosynthetic process (GO:0009058)|canonical Wnt signaling pat…	beta-catenin binding (GO:0008013)|binding (GO:0005488)|delta-catenin binding (GO:0070097)|DNA-binding transcription factor binding (GO:0140297)|enzyme binding (GO:0019899)|histone deacetylase binding (GO:0042826)|kinase binding (GO:0019900)|molecular_function (GO:0003674)|protein binding (GO:0005515)|protein kinase A binding (GO:0051018)|protein kinase binding (GO:0019901)|protein kinase C bindin…	beta-catenin destruction complex (GO:0030877)|cell junction (GO:0030054)|cellular anatomical entity (GO:0110165)|cellular_component (GO:0005575)|cytoplasm (GO:0005737)|cytosol (GO:0005829)|intracellular anatomical structure (GO:0005622)|intracellular membrane-bounded organelle (GO:0043231)|intracellular organelle (GO:0043229)|intracellular organelle lumen (GO:0070013)|membrane-bounded organelle (…		TCF dependent signaling in response to WNT (WP3339)	DOWN	-	-	-	-	-	P2	-0.0930516	-0.248023	-0.55449	0.052006	-0.787546	0.0169712	-0.312879	-0.697065	-0.0388473	-0.476839	-0.419303	0.0347039	-0.226568	0.264171	-0.381995	0.363701	-0.284867	-0.221863	-0.573205	-0.370954	0.150369	0.425457	-0.551096	0.46751	0.433463	0.0156664	0.454442	0.00231052	-0.175796	-0.212332	-0.164643	0.289251	0.512144	0.493624	0.472624	0.194958
DDAH2	dimethylarginine dimethylaminohydrolase 2	alpha-amino acid catabolic process (GO:1901606)|alpha-amino acid metabolic process (GO:1901605)|apoptotic process (GO:0006915)|arginine catabolic process (GO:0006527)|arginine metabolic process (GO:0006525)|biological regulation (GO:0065007)|biological_process (GO:0008150)|biosynthetic process (GO:0009058)|carboxylic acid catabolic process (GO:0046395)|carboxylic acid metabolic process (GO:001975…	amino acid binding (GO:0016597)|anion binding (GO:0043168)|binding (GO:0005488)|carboxylic acid binding (GO:0031406)|catalytic activity (GO:0003824)|dimethylargininase activity (GO:0016403)|hydrolase activity (GO:0016787)|hydrolase activity, acting on carbon-nitrogen (but not peptide) bonds (GO:0016810)|hydrolase activity, acting on carbon-nitrogen (but not peptide) bonds, in linear amidines (GO:…	cellular anatomical entity (GO:0110165)|cellular_component (GO:0005575)|cytoplasm (GO:0005737)|cytosol (GO:0005829)|extracellular exosome (GO:0070062)|extracellular organelle (GO:0043230)|extracellular region (GO:0005576)|extracellular space (GO:0005615)|extracellular vesicle (GO:1903561)|intracellular anatomical structure (GO:0005622)|intracellular membrane-bounded organelle (GO:0043231)|intrace…		Metabolism of nitric oxide: NOS3 activation and regulation (WP1850)|Nitric oxide metabolism in cystic fibrosis (WP4947)	DOWN	-	-	-	-	-	P2	-0.253516	-0.239658	-0.612078	-0.515886	-0.554082	0.246602	-0.423849	-0.51435	-0.0562187	-0.560645	-0.0550957	-0.44019	-0.228701	0.147911	-0.303439	-0.609166	-0.286791	-0.180059	-0.432029	0.413855	-0.353442	-0.624102	-0.125322	-0.483706	0.556318	-0.310237	-0.398891	-0.479362	0.13318	-0.380628	-0.463778	0.341565	-0.0880325	-1.54234	0.745535	0.909263
ENOX2	ecto-NOX disulfide-thiol exchanger 2	biological regulation (GO:0065007)|biological_process (GO:0008150)|growth (GO:0040007)|regulation of biological process (GO:0050789)|regulation of growth (GO:0040008)|rhythmic process (GO:0048511)|ultradian rhythm (GO:0007624)	binding (GO:0005488)|catalytic activity (GO:0003824)|disulfide oxidoreductase activity (GO:0015036)|heterocyclic compound binding (GO:1901363)|molecular_function (GO:0003674)|nucleic acid binding (GO:0003676)|organic cyclic compound binding (GO:0097159)|oxidoreductase activity (GO:0016491)|oxidoreductase activity, acting on a sulfur group of donors (GO:0016667)|protein disulfide oxidoreductase ac…	cell periphery (GO:0071944)|cell surface (GO:0009986)|cellular anatomical entity (GO:0110165)|cellular_component (GO:0005575)|cytoplasm (GO:0005737)|cytosol (GO:0005829)|external side of plasma membrane (GO:0009897)|extracellular region (GO:0005576)|extracellular space (GO:0005615)|intracellular anatomical structure (GO:0005622)|membrane (GO:0016020)|plasma membrane (GO:0005886)|side of membrane …			DOWN	-	-	-	-	-	P2	-0.459306	-0.285354	-0.235167	-0.407437	-0.617255	-0.527011	-0.452326	0.401065	-0.550705	-0.735252	-0.865451	-0.375781	0.131715	-0.0466374	0.399803	-0.726896	0.0408171	-0.202564	0.293469	-0.343192	0.420615	-0.289566	-1.0713	-0.218683	0.17013	0.0427632	-0.0788854	0.19988	-1.04324	-0.979821	-0.538077	0.620617	0.125709	0.515652	-0.432239	-0.756398
EPHX2	epoxide hydrolase 2	alcohol metabolic process (GO:0006066)|amide transport (GO:0042886)|anion transport (GO:0006820)|arachidonic acid metabolic process (GO:0019369)|aromatic compound catabolic process (GO:0019439)|biological regulation (GO:0065007)|biological_process (GO:0008150)|biosynthetic process (GO:0009058)|carboxylic acid biosynthetic process (GO:0046394)|carboxylic acid metabolic process (GO:0019752)|catabol…	10-hydroxy-9-(phosphonooxy)octadecanoate phosphatase activity (GO:0033885)|binding (GO:0005488)|catalytic activity (GO:0003824)|cation binding (GO:0043169)|epoxide hydrolase activity (GO:0004301)|ether hydrolase activity (GO:0016803)|hydrolase activity (GO:0016787)|hydrolase activity, acting on ester bonds (GO:0016788)|hydrolase activity, acting on ether bonds (GO:0016801)|identical protein bindi…	cellular anatomical entity (GO:0110165)|cellular_component (GO:0005575)|cytoplasm (GO:0005737)|cytosol (GO:0005829)|extracellular exosome (GO:0070062)|extracellular organelle (GO:0043230)|extracellular region (GO:0005576)|extracellular space (GO:0005615)|extracellular vesicle (GO:1903561)|intracellular anatomical structure (GO:0005622)|intracellular membrane-bounded organelle (GO:0043231)|intrace…	hsa00590 Arachidonic acid metabolism|hsa01100 Metabolic pathways|hsa04146 Peroxisome	7-oxo-C and 7-beta-HC pathways (WP5064)|ALA oxylipin metabolism (WP5136)|Arachidonate epoxygenase / epoxide hydrolase (WP678)|Arachidonic acid (AA, ARA) oxylipin metabolism (WP5155)|Arachidonic acid metabolism (WP2650)|Biosynthesis of DHA-derived SPMs (WP4439)|Dihomo-gamma-linolenic acid (DGLA) oxylipin metabolism (WP5147)|Docosahexaenoic acid (DHA) oxylipin metabolism (WP5154)|Eicosanoid metabol…	DOWN	-	-	-	-	-	P2	-0.82117	-0.482051	0.200353	-0.0317135	-1.42021	-0.425233	-0.144676	-0.856909	-0.533456	-0.67837	-0.322296	0.53941	-0.362168	-0.0836893	-0.108847	-0.672554	0.441316	-0.0380472	0.323151	-0.170093	-0.282649	0.127122	-0.519886	0.503678	0.405337	0.573405	-0.625365	0.00467275	0.662516	-0.535476	-0.0865789	-0.714878	0.175831	-0.271385	-0.372927	0.493583
EXTL2	exostosin like glycosyltransferase 2	amino sugar metabolic process (GO:0006040)|biological regulation (GO:0065007)|biological_process (GO:0008150)|biosynthetic process (GO:0009058)|carbohydrate derivative biosynthetic process (GO:1901137)|carbohydrate derivative metabolic process (GO:1901135)|cell communication (GO:0007154)|cellular aromatic compound metabolic process (GO:0006725)|cellular biosynthetic process (GO:0044249)|cellular …	acetylgalactosaminyltransferase activity (GO:0008376)|acetylglucosaminyltransferase activity (GO:0008375)|alpha-1,4-N-acetylgalactosaminyltransferase activity (GO:0035248)|binding (GO:0005488)|carbohydrate derivative binding (GO:0097367)|catalytic activity (GO:0003824)|cation binding (GO:0043169)|glucuronyl-galactosyl-proteoglycan 4-alpha-N-acetylglucosaminyltransferase activity (GO:0001888)|gluc…	cellular anatomical entity (GO:0110165)|cellular_component (GO:0005575)|cytoplasm (GO:0005737)|cytosol (GO:0005829)|endomembrane system (GO:0012505)|endoplasmic reticulum (GO:0005783)|endoplasmic reticulum membrane (GO:0005789)|endoplasmic reticulum subcompartment (GO:0098827)|extracellular region (GO:0005576)|integral component of membrane (GO:0016021)|intracellular anatomical structure (GO:0005…	hsa00534 Glycosaminoglycan biosynthesis - heparan sulfate / heparin|hsa01100 Metabolic pathways	XBP1(S) activates chaperone genes (WP3472)	DOWN	-	-	-	-	-	P2	-0.382644	-0.729494	-0.114418	-0.0598989	0.0527287	-0.124262	-0.828806	-0.410733	-0.324892	-0.411415	0.0442384	0.446251	0.462028	-0.186441	-0.521104	-0.524819	-0.682315	-0.039615	-0.0421828	-0.127416	-0.926683	-1.53584	-0.614055	0.175905	0.41665	-0.0710714	0.316157	0.746943	-0.245168	0.113891	1.03978	0.212807	-1.2156	-0.641803	-0.0765925	0.0353004
FBXO5	F-box protein 5	aging (GO:0007568)|anaphase-promoting complex-dependent catabolic process (GO:0031145)|anatomical structure development (GO:0048856)|anatomical structure maturation (GO:0071695)|animal organ development (GO:0048513)|aromatic compound biosynthetic process (GO:0019438)|biological regulation (GO:0065007)|biological_process (GO:0008150)|biomineral tissue development (GO:0031214)|biomineralization (GO…	anaphase-promoting complex binding (GO:0010997)|binding (GO:0005488)|cation binding (GO:0043169)|enzyme binding (GO:0019899)|enzyme inhibitor activity (GO:0004857)|enzyme regulator activity (GO:0030234)|ion binding (GO:0043167)|kinase binding (GO:0019900)|metal ion binding (GO:0046872)|molecular function regulator (GO:0098772)|molecular_function (GO:0003674)|protein-containing complex binding (GO…	cellular anatomical entity (GO:0110165)|cellular_component (GO:0005575)|cytoplasm (GO:0005737)|cytoskeleton (GO:0005856)|cytosol (GO:0005829)|intracellular anatomical structure (GO:0005622)|intracellular membrane-bounded organelle (GO:0043231)|intracellular non-membrane-bounded organelle (GO:0043232)|intracellular organelle (GO:0043229)|intracellular organelle lumen (GO:0070013)|meiotic spindle (…	hsa04114 Oocyte meiosis	Mitotic G1 phase and G1/S transition (WP1858)|Mitotic Metaphase and Anaphase (WP2757)|Regulation of mitotic cell cycle (WP4109)	DOWN	-	-	-	-	-	P2	-0.213385	-0.244172	-0.539369	0.0602779	-0.737224	-1.0462	-1.08357	-0.179342	-0.0316873	-0.192955	-0.548967	-0.115097	0.120787	-0.0426389	0.0948893	-0.723948	-0.871414	0.269424	-0.127147	0.0682278	0.393821	-0.297425	-0.133802	0.471533	-0.268786	0.949937	-0.798735	0.98214	0.156181	-0.182179	0.213867	-0.435047	0.528074	-0.233385	0.0723668	-0.19205
GPATCH4	G-patch domain containing 4		binding (GO:0005488)|heterocyclic compound binding (GO:1901363)|molecular_function (GO:0003674)|nucleic acid binding (GO:0003676)|organic cyclic compound binding (GO:0097159)|protein binding (GO:0005515)|RNA binding (GO:0003723)				DOWN	-	-	-	-	-	P2	-0.347332	-0.396853	0.1996	-0.231374	-0.707157	-0.0585434	-0.797558	-0.155363	-0.311154	-0.956349	-0.172802	0.335605	0.177636	-0.844316	-0.457973	-0.709284	1.38765	-0.452285	0.83446	0.159456	-0.588282	-0.504991	0.404403	-0.134961	-1.05765	-0.0841711	-0.890552	-0.95775	-0.287829	0.0925351	-1.1701	-0.615886	-0.628484	-0.197468	-0.570947	0.652633
GPM6B	glycoprotein M6B	actin cytoskeleton organization (GO:0030036)|actin filament-based process (GO:0030029)|amide transport (GO:0042886)|anatomical structure development (GO:0048856)|animal organ development (GO:0048513)|anion transport (GO:0006820)|biological adhesion (GO:0022610)|biological regulation (GO:0065007)|biological_process (GO:0008150)|biomineral tissue development (GO:0031214)|biomineralization (GO:01101…	molecular_function (GO:0003674)	cell periphery (GO:0071944)|cellular anatomical entity (GO:0110165)|cellular_component (GO:0005575)|integral component of membrane (GO:0016021)|intrinsic component of membrane (GO:0031224)|membrane (GO:0016020)|membrane microdomain (GO:0098857)|membrane raft (GO:0045121)|plasma membrane (GO:0005886)			DOWN	-	-	-	-	-	P2	-0.495294	-0.0422367	-0.698061	-0.805458	0.0988036	-0.881339	0.0501975	-0.248824	-0.934196	-0.177045	0.615174	-0.145641	-1.3836	-1.57572	0.36367	0.535387	-0.170527	0.0350148	-0.0272204	-0.28658	0.467042	0.162095	0.385708	-0.614259	0.141371	0.0351255	-0.368018	0.75435	0.836837	-0.518542	-0.573049	-0.456749	-0.0155916	-0.820956	-0.568243	0.0580788
H4C3	H4 clustered histone 3	anatomical structure development (GO:0048856)|anatomical structure homeostasis (GO:0060249)|animal organ development (GO:0048513)|aromatic compound biosynthetic process (GO:0019438)|ATP-dependent chromatin remodeling (GO:0043044)|biological regulation (GO:0065007)|biological_process (GO:0008150)|biosynthetic process (GO:0009058)|cell differentiation (GO:0030154)|cellular aromatic compound metabol…	binding (GO:0005488)|DNA binding (GO:0003677)|heterocyclic compound binding (GO:1901363)|molecular_function (GO:0003674)|nucleic acid binding (GO:0003676)|organic cyclic compound binding (GO:0097159)|protein binding (GO:0005515)|protein dimerization activity (GO:0046983)|protein domain specific binding (GO:0019904)|protein heterodimerization activity (GO:0046982)|RNA binding (GO:0003723)	cellular anatomical entity (GO:0110165)|cellular_component (GO:0005575)|chromatin (GO:0000785)|chromosomal region (GO:0098687)|chromosome (GO:0005694)|chromosome, telomeric region (GO:0000781)|DNA packaging complex (GO:0044815)|extracellular exosome (GO:0070062)|extracellular organelle (GO:0043230)|extracellular region (GO:0005576)|extracellular space (GO:0005615)|extracellular vesicle (GO:190356…	hsa05034 Alcoholism|hsa05203 Viral carcinogenesis|hsa05322 Systemic lupus erythematosus	Activated PKN1 stimulates transcription of AR (androgen receptor) regulated genes KLK2 and KLK3 (WP3397)|Activation of anterior HOX genes in hindbrain development during early embryogenesis (WP3813)|Amyloid fiber formation (WP3547)|B-WICH complex positively regulates rRNA expression (WP3819)|Base-Excision Repair, AP Site Formation (WP3399)|Cell cycle checkpoints (WP1775)|Chromatin organization (W…	DOWN	-	-	-	-	-	P2	-0.442763	0.205174	0.159329	-0.411352	-0.642698	-0.510248	-0.517764	-0.234966	-0.464459	-0.722119	-1.12467	-0.0942703	0.703694	0.14083	-0.305749	-0.072916	-0.0246636	0.138149	-1.32721	0.385566	0.340101	-0.321288	-0.994593	-0.67515	-0.434823	0.368773	-1.02049	-0.12804	-0.825428	-0.0983146	0.186847	0.309637	0.0235629	0.737324	-0.698524	-0.21427
HYAL2	hyaluronidase 2	aging (GO:0007568)|ameboidal-type cell migration (GO:0001667)|amide transport (GO:0042886)|aminoglycan catabolic process (GO:0006026)|aminoglycan metabolic process (GO:0006022)|anatomical structure development (GO:0048856)|anatomical structure morphogenesis (GO:0009653)|animal organ development (GO:0048513)|animal organ morphogenesis (GO:0009887)|anion transport (GO:0006820)|apoptotic process (GO…	binding (GO:0005488)|carbohydrate derivative binding (GO:0097367)|catalytic activity (GO:0003824)|cytokine binding (GO:0019955)|enzyme binding (GO:0019899)|enzyme inhibitor activity (GO:0004857)|enzyme regulator activity (GO:0030234)|exogenous protein binding (GO:0140272)|glycosaminoglycan binding (GO:0005539)|growth factor binding (GO:0019838)|hexosaminidase activity (GO:0015929)|hyaluronic acid…	actin-based cell projection (GO:0098858)|anchored component of external side of plasma membrane (GO:0031362)|anchored component of membrane (GO:0031225)|anchored component of plasma membrane (GO:0046658)|apical part of cell (GO:0045177)|apical plasma membrane (GO:0016324)|bounding membrane of organelle (GO:0098588)|cell periphery (GO:0071944)|cell projection (GO:0042995)|cell surface (GO:0009986)…	hsa00531 Glycosaminoglycan degradation|hsa01100 Metabolic pathways|hsa04142 Lysosome	Glycosaminoglycan degradation (WP4815)|Glycosaminoglycan metabolism (WP2743)	DOWN	-	-	-	-	-	P2	-0.579995	0.262991	-0.231938	-1.16817	-0.43995	-0.484313	-0.559614	-0.974924	-0.345785	-0.909453	-0.735578	0.232191	0.0832902	0.686797	-0.429086	-0.45624	0.721944	-0.701199	-0.146324	-0.304252	0.553031	0.0870177	-0.714896	0.139333	0.130176	0.371024	-0.85654	1.10029	0.343091	-0.55642	-0.0770727	0.131107	0.165497	0.538812	-0.38234	-0.0176473
IGFBP7	insulin like growth factor binding protein 7	anatomical structure development (GO:0048856)|biological adhesion (GO:0022610)|biological regulation (GO:0065007)|biological_process (GO:0008150)|biosynthetic process (GO:0009058)|cell adhesion (GO:0007155)|cell communication (GO:0007154)|cell growth (GO:0016049)|cell population proliferation (GO:0008283)|cellular component organization (GO:0016043)|cellular component organization or biogenesis (…	binding (GO:0005488)|extracellular matrix structural constituent (GO:0005201)|growth factor binding (GO:0019838)|insulin-like growth factor binding (GO:0005520)|molecular_function (GO:0003674)|protein binding (GO:0005515)|structural molecule activity (GO:0005198)	cell periphery (GO:0071944)|cellular anatomical entity (GO:0110165)|cellular_component (GO:0005575)|collagen-containing extracellular matrix (GO:0062023)|cytoplasm (GO:0005737)|endomembrane system (GO:0012505)|endoplasmic reticulum (GO:0005783)|endoplasmic reticulum lumen (GO:0005788)|external encapsulating structure (GO:0030312)|extracellular exosome (GO:0070062)|extracellular matrix (GO:0031012…		Interactions between LOXL4 and oxidative stress pathway (WP3670)|PodNet: protein-protein interactions in the podocyte (WP4755)|Post-translational protein phosphorylation (WP4110)|Regulation of IGF transport and uptake by IGF binding proteins (WP2799)|Senescence-Associated Secretory Phenotype (SASP) (WP3391)|Senescence and autophagy in cancer (WP615)|VEGFA-VEGFR2 signaling pathway (WP3888)	DOWN	-	-	-	-	-	P2	0.108967	-0.193098	0.0462473	-1.02731	-0.866057	-0.13376	-0.686385	-0.594122	-0.41243	-0.700715	-0.459629	-0.381742	0.531501	0.360374	0.888424	0.508893	0.873952	-0.116038	-0.527797	-0.469973	0.212429	-0.546462	-0.77178	-0.388011	-0.307023	-0.609053	-1.0342	0.01185	-0.467999	0.15245	-0.820174	-0.761007	0.0810773	0.205963	-0.247903	-1.00471
LINC01873	long intergenic non-protein coding RNA 1873						DOWN	-	-	-	-	-	P2	-0.783815	0.256052	-0.233681	-0.45934	-0.404032	-0.0383115	-0.897935	-0.970502	-0.338134	-0.376038	-0.775657	0.938198	-0.208219	0.489723	-0.274126	-0.80367	-0.860582	0.161211	0.587304	0.921242	-0.169312	0.155276	0.0554345	0.196798	-0.435559	0.0328917	-0.447647	0.00746739	0.211851	-0.422517	-0.143622	0.805743	0.0234925	-0.266876	0.252283	-0.618171
LPIN1	lipin 1	acylglycerol biosynthetic process (GO:0046463)|acylglycerol metabolic process (GO:0006639)|adaptive thermogenesis (GO:1990845)|anatomical structure development (GO:0048856)|animal organ development (GO:0048513)|animal organ regeneration (GO:0031100)|aromatic compound biosynthetic process (GO:0019438)|biological regulation (GO:0065007)|biological_process (GO:0008150)|biosynthetic process (GO:00090…	binding (GO:0005488)|catalytic activity (GO:0003824)|hydrolase activity (GO:0016787)|hydrolase activity, acting on ester bonds (GO:0016788)|molecular function regulator (GO:0098772)|molecular_function (GO:0003674)|phosphatase activity (GO:0016791)|phosphatidate phosphatase activity (GO:0008195)|phosphoric ester hydrolase activity (GO:0042578)|protein binding (GO:0005515)|transcription coactivator…	bounding membrane of organelle (GO:0098588)|cellular anatomical entity (GO:0110165)|cellular_component (GO:0005575)|cytoplasm (GO:0005737)|cytosol (GO:0005829)|endomembrane system (GO:0012505)|endoplasmic reticulum (GO:0005783)|endoplasmic reticulum membrane (GO:0005789)|endoplasmic reticulum subcompartment (GO:0098827)|envelope (GO:0031975)|intracellular anatomical structure (GO:0005622)|intrace…	hsa00561 Glycerolipid metabolism|hsa00564 Glycerophospholipid metabolism|hsa01100 Metabolic pathways|hsa04150 mTOR signaling pathway	Adipogenesis (WP236)|Congenital generalized lipodystrophy (CGL) (WP5101)|Glycerophospholipid biosynthesis (WP2740)|Glycerophospholipid biosynthetic pathway (WP2533)|Mitotic Prophase (WP2654)|Sterol regulatory element-binding proteins (SREBP) signaling (WP1982)|Transcription factor regulation in adipogenesis (WP3599)|Triglyceride metabolism (WP4131)	DOWN	-	-	-	-	-	P2	-0.825951	-0.352061	-0.692473	-0.540645	-0.402367	-0.0387258	-0.731234	-0.962978	-0.808936	0.180901	-0.108836	-0.223004	0.0560137	0.328285	-0.746232	-0.057441	-0.551525	-0.29029	0.820518	0.171424	-0.205698	0.650191	0.600398	0.335276	0.208306	-0.845295	0.482411	-0.346039	0.00287767	-0.0364653	-0.134771	0.339514	-0.254344	0.30905	-0.174954	0.565634
MAPK8IP1	mitogen-activated protein kinase 8 interacting protein 1	alpha-beta T cell activation (GO:0046631)|alpha-beta T cell proliferation (GO:0046633)|apoptotic process (GO:0006915)|apoptotic signaling pathway (GO:0097190)|aromatic compound biosynthetic process (GO:0019438)|biological regulation (GO:0065007)|biological_process (GO:0008150)|biosynthetic process (GO:0009058)|CD8-positive, alpha-beta T cell activation (GO:0036037)|CD8-positive, alpha-beta T cell…	binding (GO:0005488)|cytoskeletal protein binding (GO:0008092)|enzyme binding (GO:0019899)|enzyme inhibitor activity (GO:0004857)|enzyme regulator activity (GO:0030234)|JUN kinase binding (GO:0008432)|kinase binding (GO:0019900)|kinase inhibitor activity (GO:0019210)|kinase regulator activity (GO:0019207)|kinesin binding (GO:0019894)|MAP-kinase scaffold activity (GO:0005078)|mitogen-activated pro…	axon (GO:0030424)|axonal growth cone (GO:0044295)|cell body (GO:0044297)|cell junction (GO:0030054)|cell periphery (GO:0071944)|cell projection (GO:0042995)|cellular anatomical entity (GO:0110165)|cellular_component (GO:0005575)|cytoplasm (GO:0005737)|cytosol (GO:0005829)|dendrite (GO:0030425)|dendrite terminus (GO:0044292)|dendritic growth cone (GO:0044294)|dendritic tree (GO:0097447)|dentate gy…	hsa04010 MAPK signaling pathway	MAPK signaling pathway (WP382)	DOWN	-	-	-	-	-	P2	-0.640051	-0.205027	-0.749415	-0.402409	-0.336908	-0.433453	-0.396916	-0.234607	-0.0252336	-1.41625	-0.655612	-0.354864	-0.179637	0.241282	-0.215905	0.563766	0.791863	0.0780246	0.0807737	0.125805	1.01047	0.783505	-0.77101	-0.202389	0.116613	0.0193476	-2.02627	-0.780613	-0.519051	-0.954921	0.182899	-0.0852196	0.137295	0.521734	0.087306	-0.154312
MIIP	migration and invasion inhibitory protein	biological regulation (GO:0065007)|biological_process (GO:0008150)|cell cycle (GO:0007049)|cell cycle G2/M phase transition (GO:0044839)|cell cycle phase transition (GO:0044770)|cell cycle process (GO:0022402)|cell migration (GO:0016477)|cell motility (GO:0048870)|cellular process (GO:0009987)|G2/M transition of mitotic cell cycle (GO:0000086)|localization (GO:0051179)|localization of cell (GO:00…	binding (GO:0005488)|molecular_function (GO:0003674)|protein binding (GO:0005515)				DOWN	-	-	-	-	-	P2	-0.79447	-0.478579	0.493946	-0.854105	-0.602665	-0.897419	-0.577091	-0.231509	-0.350726	-0.12447	-0.268315	0.148171	0.0927501	0.253983	-1.00842	-0.250217	0.378397	0.914041	0.306275	0.0826743	0.108871	0.453481	-0.412652	-0.206869	0.0746089	0.379544	-0.370597	-0.301338	0.35994	-0.792708	0.462017	0.776876	-0.735304	0.514007	0.48243	0.394029
MVD	mevalonate diphosphate decarboxylase	acetyl-CoA metabolic process (GO:0006084)|acyl-CoA metabolic process (GO:0006637)|alcohol biosynthetic process (GO:0046165)|alcohol metabolic process (GO:0006066)|biological regulation (GO:0065007)|biological_process (GO:0008150)|biosynthetic process (GO:0009058)|carbohydrate derivative biosynthetic process (GO:1901137)|carbohydrate derivative metabolic process (GO:1901135)|cell population prolif…	adenyl nucleotide binding (GO:0030554)|adenyl ribonucleotide binding (GO:0032559)|anion binding (GO:0043168)|ATP binding (GO:0005524)|binding (GO:0005488)|carbohydrate derivative binding (GO:0097367)|carbon-carbon lyase activity (GO:0016830)|carboxy-lyase activity (GO:0016831)|catalytic activity (GO:0003824)|diphosphomevalonate decarboxylase activity (GO:0004163)|heat shock protein binding (GO:00…	cellular anatomical entity (GO:0110165)|cellular_component (GO:0005575)|cytoplasm (GO:0005737)|cytosol (GO:0005829)|intracellular anatomical structure (GO:0005622)	hsa00900 Terpenoid backbone biosynthesis|hsa01100 Metabolic pathways	Activation of gene expression by SREBF (SREBP) (WP2706)|Asparagine N-linked glycosylation (WP1785)|Aspirin and miRNAs (WP4707)|Cholesterol biosynthesis (WP1795)|Cholesterol biosynthesis pathway (WP197)|Cholesterol biosynthesis pathway. (WP5226)|Cholesterol biosynthesis, regulation and transport (WP4281)|Cholesterol metabolism with Bloch and Kandutsch-Russell pathways (WP4718)|Cholesterol synthesi…	DOWN	-	-	-	-	-	P2	-1.48957	-1.08272	-0.300411	-0.808502	-0.331551	-0.471222	-1.1792	-0.15204	-0.35088	-0.734047	-0.261837	-0.516915	-0.868834	0.133993	-0.446261	-1.5436	-0.145841	-1.79022	-0.179053	0.930696	-0.783439	0.778918	-0.235911	-1.03972	0.0874694	-0.32506	-0.560123	-1.12408	0.100196	-0.714288	0.161268	0.237541	0.152625	-0.456672	-0.251075	0.106133
NAPA-AS1	NAPA antisense RNA 1						DOWN	-	-	-	-	-	P2	-0.31679	-0.756491	-0.0197897	-0.587534	-0.206288	-0.112554	-0.580269	-1.00751	-0.0187714	-0.588645	-0.553109	0.475207	0.402788	0.0803599	0.0927928	0.563257	-0.192854	-1.03654	-0.389516	-0.700463	-0.0410948	-0.305021	-0.104228	-0.242374	0.0988273	-0.537273	0.0783358	-0.481643	0.249318	-0.447382	-0.184607	-0.0633187	-0.528315	0.846737	1.12368	-0.187701
RBP7	retinol binding protein 7		alcohol binding (GO:0043178)|binding (GO:0005488)|isoprenoid binding (GO:0019840)|lipid binding (GO:0008289)|molecular_function (GO:0003674)|protein binding (GO:0005515)|retinal binding (GO:0016918)|retinoid binding (GO:0005501)|retinol binding (GO:0019841)|small molecule binding (GO:0036094)|vitamin binding (GO:0019842)	cellular anatomical entity (GO:0110165)|cellular_component (GO:0005575)|cytoplasm (GO:0005737)|intracellular anatomical structure (GO:0005622)		Vitamin A and carotenoid metabolism (WP716)	DOWN	-	-	-	-	-	P2	-0.552479	-0.708843	-0.0172727	-0.381498	-0.903247	-0.228394	-0.111214	-0.750154	-0.0542779	0.0672953	0.628343	-0.559167	0.142662	0.562912	0.111724	0.371109	-0.0196068	-0.196018	-0.303743	-0.121293	-0.408473	0.0741923	0.21068	-0.202202	-0.0852316	0.0198492	0.0891957	0.0067033	0.737896	-0.597447	0.696213	-0.726402	-0.533745	-0.202732	-0.420407	-0.509999
RGL2	ral guanine nucleotide dissociation stimulator like 2	apoptotic process (GO:0006915)|biological regulation (GO:0065007)|biological_process (GO:0008150)|cardiac muscle cell apoptotic process (GO:0010659)|cell communication (GO:0007154)|cell death (GO:0008219)|cellular process (GO:0009987)|cellular response to stimulus (GO:0051716)|inositol lipid-mediated signaling (GO:0048017)|intracellular signal transduction (GO:0035556)|muscle cell apoptotic proce…	binding (GO:0005488)|enzyme regulator activity (GO:0030234)|GTPase regulator activity (GO:0030695)|guanyl-nucleotide exchange factor activity (GO:0005085)|molecular function regulator (GO:0098772)|molecular_function (GO:0003674)|nucleoside-triphosphatase regulator activity (GO:0060589)|protein binding (GO:0005515)	cellular_component (GO:0005575)	hsa04014 Ras signaling pathway	RAF/MAP kinase cascade (WP2735)|Ras signaling (WP4223)	DOWN	-	-	-	-	-	P2	-0.30966	-0.0362529	-0.922712	-0.378362	-0.465305	-0.359693	0.297169	-0.681753	-0.35236	-0.568756	-0.274649	0.317225	-0.621359	-0.248058	-0.351174	-0.716731	0.328703	0.0728008	0.385053	-0.214517	0.243787	0.0652064	-0.112262	-0.528264	-0.763683	0.381813	-0.512657	-0.779974	-0.271782	0.201814	-0.205382	0.0830436	-0.0891635	-0.216798	0.48187	-0.138749
SAMD8	sterile alpha motif domain containing 8	amide biosynthetic process (GO:0043604)|biological regulation (GO:0065007)|biological_process (GO:0008150)|biosynthetic process (GO:0009058)|cellular amide metabolic process (GO:0043603)|cellular biosynthetic process (GO:0044249)|cellular component biogenesis (GO:0044085)|cellular component organization or biogenesis (GO:0071840)|cellular lipid metabolic process (GO:0044255)|cellular metabolic pr…	catalytic activity (GO:0003824)|ceramide cholinephosphotransferase activity (GO:0047493)|ceramide phosphoethanolamine synthase activity (GO:0002950)|molecular_function (GO:0003674)|phosphotransferase activity, for other substituted phosphate groups (GO:0016780)|sphingomyelin synthase activity (GO:0033188)|transferase activity (GO:0016740)|transferase activity, transferring phosphorus-containing g…	bounding membrane of organelle (GO:0098588)|cell periphery (GO:0071944)|cellular anatomical entity (GO:0110165)|cellular_component (GO:0005575)|cytoplasm (GO:0005737)|cytosol (GO:0005829)|endomembrane system (GO:0012505)|endoplasmic reticulum (GO:0005783)|endoplasmic reticulum membrane (GO:0005789)|endoplasmic reticulum subcompartment (GO:0098827)|Golgi apparatus (GO:0005794)|Golgi apparatus subc…		Sphingolipid metabolism (WP2788)	DOWN	-	-	-	-	-	P2	-0.112398	-0.0445462	-0.465094	-0.398186	-0.459418	-0.618004	-0.43995	-0.844258	-0.309463	-0.506448	-0.196213	-0.354345	-0.261922	0.379395	0.898914	0.923741	0.224807	0.26958	-0.130265	-0.998886	0.866562	-0.276265	1.13029	0.485883	0.0768586	0.37926	-0.308208	-0.773935	0.122833	-0.0351437	0.289881	-0.162441	-0.318725	0.519163	-0.813579	0.562627
SC5D	sterol-C5-desaturase	alcohol biosynthetic process (GO:0046165)|alcohol metabolic process (GO:0006066)|biological regulation (GO:0065007)|biological_process (GO:0008150)|biosynthetic process (GO:0009058)|cholesterol biosynthetic process (GO:0006695)|cholesterol biosynthetic process via desmosterol (GO:0033489)|cholesterol biosynthetic process via lathosterol (GO:0033490)|cholesterol metabolic process (GO:0008203)|lipi…	binding (GO:0005488)|C-5 sterol desaturase activity (GO:0000248)|catalytic activity (GO:0003824)|cation binding (GO:0043169)|ion binding (GO:0043167)|iron ion binding (GO:0005506)|metal ion binding (GO:0046872)|molecular_function (GO:0003674)|oxidoreductase activity (GO:0016491)|oxidoreductase activity, acting on paired donors, with incorporation or reduction of molecular oxygen (GO:0016705)|oxid…	cellular anatomical entity (GO:0110165)|cellular_component (GO:0005575)|cytoplasm (GO:0005737)|endomembrane system (GO:0012505)|endoplasmic reticulum (GO:0005783)|endoplasmic reticulum membrane (GO:0005789)|endoplasmic reticulum subcompartment (GO:0098827)|integral component of membrane (GO:0016021)|intracellular anatomical structure (GO:0005622)|intracellular membrane-bounded organelle (GO:00432…	hsa00100 Steroid biosynthesis|hsa01100 Metabolic pathways	Activation of gene expression by SREBF (SREBP) (WP2706)|Cholesterol biosynthesis (WP1795)|Cholesterol biosynthesis pathway (WP197)|Cholesterol biosynthesis pathway. (WP5226)|Cholesterol biosynthesis with skeletal dysplasias (WP4804)|Cholesterol metabolism with Bloch and Kandutsch-Russell pathways (WP4718)|Cholesterol synthesis disorders (WP5193)|WikiPathways Academy: met-1-last (WP3907)|WikiPathw…	DOWN	-	-	-	-	-	P2	-0.437544	-0.873884	-0.524811	-0.433773	-0.0644479	-0.388028	-0.231696	-1.32873	-0.958936	-0.417231	0.367928	-0.598356	0.0765791	0.151877	-0.533734	-0.958784	-0.272233	0.294294	0.114101	-0.408625	-0.246989	-0.479844	-0.466718	0.0194751	-0.328989	0.325661	-0.106076	-0.505556	0.0602693	-0.247389	-0.907917	-0.364528	-0.411774	0.638982	0.117848	-0.483006
SCD	stearoyl-CoA desaturase	acyl-CoA biosynthetic process (GO:0071616)|acyl-CoA metabolic process (GO:0006637)|adaptive thermogenesis (GO:1990845)|alcohol biosynthetic process (GO:0046165)|alcohol metabolic process (GO:0006066)|amide biosynthetic process (GO:0043604)|aromatic compound biosynthetic process (GO:0019438)|biological regulation (GO:0065007)|biological_process (GO:0008150)|biosynthetic process (GO:0009058)|carboh…	acyl-CoA desaturase activity (GO:0016215)|binding (GO:0005488)|catalytic activity (GO:0003824)|cation binding (GO:0043169)|ion binding (GO:0043167)|iron ion binding (GO:0005506)|metal ion binding (GO:0046872)|molecular_function (GO:0003674)|oxidoreductase activity (GO:0016491)|oxidoreductase activity, acting on paired donors, with incorporation or reduction of molecular oxygen (GO:0016705)|oxidor…	cellular anatomical entity (GO:0110165)|cellular_component (GO:0005575)|cytoplasm (GO:0005737)|endomembrane system (GO:0012505)|endoplasmic reticulum (GO:0005783)|endoplasmic reticulum membrane (GO:0005789)|endoplasmic reticulum subcompartment (GO:0098827)|integral component of endoplasmic reticulum membrane (GO:0030176)|integral component of membrane (GO:0016021)|integral component of organelle …	hsa01040 Biosynthesis of unsaturated fatty acids|hsa01100 Metabolic pathways|hsa01212 Fatty acid metabolism|hsa03320 PPAR signaling pathway|hsa04152 AMPK signaling pathway	Activation of gene expression by SREBF (SREBP) (WP2706)|Adipogenesis (WP236)|Angiopoietin-like protein 8 regulatory pathway (WP3915)|AXL signaling pathway (WP4847)|Cholesterol metabolism with Bloch and Kandutsch-Russell pathways (WP4718)|Fatty acid biosynthesis (WP357)|Fatty acyl-CoA biosynthesis (WP4114)|Liver X receptor pathway (WP2874)|NR1H2 and NR1H3-mediated signaling (WP5012)|Nuclear recept…	DOWN	-	DOWN	-	-	DOWN	P2	-0.669696	-0.765102	-0.455913	-0.866708	-0.658548	-0.247511	-0.0693284	-1.07252	-0.976916	-0.117591	-0.418331	-0.565717	-0.711198	-0.351124	-0.0862672	-0.996298	-0.59308	-0.759936	-0.663349	-0.528212	-0.323939	-0.9681	-0.115212	-0.404182	-1.06507	-0.829656	-0.570287	-0.897601	0.0889592	0.183543	-0.651717	-0.219021	-1.01263	0.139781	0.296249	0.494502
SLC25A20	solute carrier family 25 member 20	acyl carnitine transmembrane transport (GO:1902616)|acyl carnitine transport (GO:0006844)|amino-acid betaine transport (GO:0015838)|anatomical structure development (GO:0048856)|anion transmembrane transport (GO:0098656)|anion transport (GO:0006820)|biological_process (GO:0008150)|carboxylic acid transmembrane transport (GO:1905039)|carnitine shuttle (GO:0006853)|carnitine transmembrane transport…	acyl carnitine transmembrane transporter activity (GO:0015227)|anion transmembrane transporter activity (GO:0008509)|binding (GO:0005488)|cation transmembrane transporter activity (GO:0008324)|ion transmembrane transporter activity (GO:0015075)|molecular_function (GO:0003674)|organic cation transmembrane transporter activity (GO:0015101)|protein binding (GO:0005515)|quaternary ammonium group tran…	cellular anatomical entity (GO:0110165)|cellular_component (GO:0005575)|cytoplasm (GO:0005737)|cytosol (GO:0005829)|envelope (GO:0031975)|integral component of membrane (GO:0016021)|intracellular anatomical structure (GO:0005622)|intracellular membrane-bounded organelle (GO:0043231)|intracellular organelle (GO:0043229)|intrinsic component of membrane (GO:0031224)|membrane-bounded organelle (GO:00…	hsa04714 Thermogenesis	Carnitine metabolism (WP4061)|Fatty acid beta-oxidation (WP143)|Ketogenesis and ketolysis (WP4742)|Mitochondrial fatty acid oxidation disorders (WP5123)|Mitochondrial long chain fatty acid beta-oxidation (WP368)|Thermogenesis (WP4321)	DOWN	-	-	-	-	-	P2	-0.885966	-0.744248	-0.629929	-0.869589	-0.184568	-0.236358	-0.494755	-0.526571	-0.0632992	-0.00373799	-0.227406	0.347735	0.423835	0.37099	-0.887428	0.322285	-0.102551	0.000729776	-0.0984418	0.698424	0.260761	-0.562356	0.145198	0.304692	-0.845394	-0.153882	-0.0692232	0.193089	-1.20403	-1.33308	-0.826029	-0.268129	0.383506	0.376942	-0.333441	-0.414802
SLC39A10	solute carrier family 39 member 10	activation of immune response (GO:0002253)|antigen receptor-mediated signaling pathway (GO:0050851)|apoptotic process (GO:0006915)|B cell activation (GO:0042113)|B cell apoptotic process (GO:0001783)|B cell proliferation (GO:0042100)|B cell receptor signaling pathway (GO:0050853)|biological regulation (GO:0065007)|biological_process (GO:0008150)|cation homeostasis (GO:0055080)|cation transmembran…	cation transmembrane transporter activity (GO:0008324)|inorganic cation transmembrane transporter activity (GO:0022890)|inorganic molecular entity transmembrane transporter activity (GO:0015318)|ion transmembrane transporter activity (GO:0015075)|metal ion transmembrane transporter activity (GO:0046873)|molecular_function (GO:0003674)|transition metal ion transmembrane transporter activity (GO:00…	cell periphery (GO:0071944)|cellular anatomical entity (GO:0110165)|cellular_component (GO:0005575)|integral component of membrane (GO:0016021)|integral component of plasma membrane (GO:0005887)|intrinsic component of membrane (GO:0031224)|intrinsic component of plasma membrane (GO:0031226)|membrane (GO:0016020)|plasma membrane (GO:0005886)	hsa05010 Alzheimer disease|hsa05012 Parkinson disease	NRF2 pathway (WP2884)|Nuclear receptors meta-pathway (WP2882)|Transport of bile salts and organic acids, metal ions and amine compounds (WP1935)|Zinc homeostasis (WP3529)	DOWN	-	-	-	-	-	P2	-0.734598	-0.416484	-0.798571	-0.698356	-0.440677	-0.531763	-0.766934	0.213045	0.122386	-0.624068	-0.4715	0.323048	-0.104104	-0.0867534	-0.319536	-0.0975844	-0.457912	0.053168	-0.59357	-0.702365	0.199541	0.0397924	-0.362758	-0.106759	0.0272691	-0.364687	-0.699426	-1.07678	-1.2051	-0.110837	-0.304768	-0.460305	0.107958	0.0546168	-0.137619	-0.178236
SQLE	squalene epoxidase	alcohol biosynthetic process (GO:0046165)|alcohol metabolic process (GO:0006066)|biological regulation (GO:0065007)|biological_process (GO:0008150)|biosynthetic process (GO:0009058)|cell population proliferation (GO:0008283)|cellular aromatic compound metabolic process (GO:0006725)|cellular component assembly (GO:0022607)|cellular component biogenesis (GO:0044085)|cellular component organization …	anion binding (GO:0043168)|binding (GO:0005488)|catalytic activity (GO:0003824)|FAD binding (GO:0071949)|flavin adenine dinucleotide binding (GO:0050660)|heterocyclic compound binding (GO:1901363)|ion binding (GO:0043167)|molecular_function (GO:0003674)|monooxygenase activity (GO:0004497)|nucleoside phosphate binding (GO:1901265)|nucleotide binding (GO:0000166)|organic cyclic compound binding (GO…	cellular anatomical entity (GO:0110165)|cellular_component (GO:0005575)|cytoplasm (GO:0005737)|endomembrane system (GO:0012505)|endoplasmic reticulum (GO:0005783)|endoplasmic reticulum membrane (GO:0005789)|endoplasmic reticulum subcompartment (GO:0098827)|integral component of membrane (GO:0016021)|intracellular anatomical structure (GO:0005622)|intracellular membrane-bounded organelle (GO:00432…	hsa00100 Steroid biosynthesis|hsa01100 Metabolic pathways	Activation of gene expression by SREBF (SREBP) (WP2706)|Cholesterol biosynthesis (WP1795)|Cholesterol biosynthesis pathway (WP197)|Cholesterol biosynthesis pathway. (WP5226)|Cholesterol biosynthesis, regulation and transport (WP4281)|Cholesterol metabolism with Bloch and Kandutsch-Russell pathways (WP4718)|Cholesterol synthesis disorders (WP5193)|Demo_complete (WP3418)|Statin inhibition of choles…	DOWN	-	-	-	-	-	P2	-1.15417	-0.543266	-0.382206	-0.788279	-1.00585	-0.849876	-0.971628	-1.11454	-1.17806	-0.646022	-0.725419	-0.145481	-0.785882	0.308741	0.299769	-0.990971	0.223901	-0.235774	-0.478633	0.620351	-0.109993	-0.627	-1.68715	-0.665107	-0.727864	-0.14575	-1.30136	-0.91618	-1.05854	0.156284	-0.236116	-0.664257	0.273087	-0.410681	-0.806396	-0.879879
STARD4	StAR related lipid transfer domain containing 4	anion transport (GO:0006820)|bile acid biosynthetic process (GO:0006699)|bile acid metabolic process (GO:0008206)|biological regulation (GO:0065007)|biological_process (GO:0008150)|biosynthetic process (GO:0009058)|carboxylic acid biosynthetic process (GO:0046394)|carboxylic acid metabolic process (GO:0019752)|cellular biosynthetic process (GO:0044249)|cellular component organization (GO:0016043)…	alcohol binding (GO:0043178)|binding (GO:0005488)|cholesterol binding (GO:0015485)|cholesterol transfer activity (GO:0120020)|lipid binding (GO:0008289)|lipid transfer activity (GO:0120013)|lipid transporter activity (GO:0005319)|molecular_function (GO:0003674)|organic cyclic compound binding (GO:0097159)|protein binding (GO:0005515)|small molecule binding (GO:0036094)|steroid binding (GO:0005496…	cellular anatomical entity (GO:0110165)|cellular_component (GO:0005575)|cytoplasm (GO:0005737)|cytoplasmic vesicle (GO:0031410)|cytosol (GO:0005829)|endomembrane system (GO:0012505)|endoplasmic reticulum (GO:0005783)|intracellular anatomical structure (GO:0005622)|intracellular membrane-bounded organelle (GO:0043231)|intracellular organelle (GO:0043229)|intracellular vesicle (GO:0097708)|membrane…		Metabolism of steroid hormones (WP2749)	DOWN	-	-	-	-	-	P2	-0.750971	-0.733747	-0.623331	-0.21541	-0.899249	-0.577741	-0.565267	-0.440454	-0.996746	0.532321	-0.162042	0.422692	-0.218812	0.00591673	0.743624	-0.354286	0.272787	-0.46349	0.190266	-0.71053	-0.268411	0.1494	-0.511328	-0.124493	-0.418895	0.367849	-0.95285	-0.722147	0.413572	0.295944	-1.58685	-0.174051	-1.23249	-0.403217	-0.524534	-1.10994
TM7SF2	transmembrane 7 superfamily member 2	alcohol biosynthetic process (GO:0046165)|alcohol metabolic process (GO:0006066)|biological regulation (GO:0065007)|biological_process (GO:0008150)|biosynthetic process (GO:0009058)|cholesterol biosynthetic process (GO:0006695)|cholesterol metabolic process (GO:0008203)|lipid biosynthetic process (GO:0008610)|lipid metabolic process (GO:0006629)|metabolic process (GO:0008152)|organic cyclic compo…	binding (GO:0005488)|catalytic activity (GO:0003824)|delta14-sterol reductase activity (GO:0050613)|heterocyclic compound binding (GO:1901363)|molecular_function (GO:0003674)|NADP binding (GO:0050661)|nucleoside phosphate binding (GO:1901265)|nucleotide binding (GO:0000166)|organic cyclic compound binding (GO:0097159)|oxidoreductase activity (GO:0016491)|oxidoreductase activity, acting on the CH-…	cell periphery (GO:0071944)|cellular anatomical entity (GO:0110165)|cellular_component (GO:0005575)|cytoplasm (GO:0005737)|endomembrane system (GO:0012505)|endoplasmic reticulum (GO:0005783)|endoplasmic reticulum membrane (GO:0005789)|endoplasmic reticulum subcompartment (GO:0098827)|envelope (GO:0031975)|integral component of endoplasmic reticulum membrane (GO:0030176)|integral component of memb…	hsa00100 Steroid biosynthesis|hsa01100 Metabolic pathways	Activation of gene expression by SREBF (SREBP) (WP2706)|Cholesterol biosynthesis (WP1795)|Cholesterol metabolism with Bloch and Kandutsch-Russell pathways (WP4718)	DOWN	-	-	-	-	-	P2	-0.910107	-0.792946	0.353382	-0.946616	-1.08615	-0.339476	-1.00858	0.274926	-0.690719	-0.640893	-0.622328	-0.412241	-1.36166	-0.109785	-0.6888	-1.11271	0.204712	-0.322114	0.158012	0.425247	-0.200655	-0.611978	-0.848429	0.54716	0.248611	0.0582827	-0.579487	-0.217569	-1.07881	-0.509384	-1.06237	-0.235095	-0.968286	-0.648897	-0.388992	-0.65899
TMEM97	transmembrane protein 97	biological regulation (GO:0065007)|biological_process (GO:0008150)|cell growth (GO:0016049)|cellular component organization (GO:0016043)|cellular component organization or biogenesis (GO:0071840)|cellular process (GO:0009987)|chemical homeostasis (GO:0048878)|cholesterol homeostasis (GO:0042632)|growth (GO:0040007)|homeostatic process (GO:0042592)|lipid homeostasis (GO:0055088)|regulation of biol…	binding (GO:0005488)|molecular_function (GO:0003674)|protein binding (GO:0005515)	bounding membrane of organelle (GO:0098588)|cell periphery (GO:0071944)|cellular anatomical entity (GO:0110165)|cellular_component (GO:0005575)|cytoplasm (GO:0005737)|endomembrane system (GO:0012505)|endoplasmic reticulum (GO:0005783)|endoplasmic reticulum membrane (GO:0005789)|endoplasmic reticulum subcompartment (GO:0098827)|envelope (GO:0031975)|integral component of membrane (GO:0016021)|intr…			DOWN	-	-	-	-	-	P2	-0.429164	-0.499331	-0.384165	-0.545715	0.0159193	-0.520074	-0.467485	-0.304011	-0.3161	-0.660427	-0.389912	-0.00295292	0.446521	0.00470701	0.285639	-0.371771	0.28919	-0.0145195	-0.316684	0.075322	-0.189299	0.0395869	0.1023	-0.124685	-1.41702	-0.661376	-0.17008	-0.681554	0.21878	0.339565	-0.746865	0.375833	-0.439293	0.292142	-0.153962	-0.13144
TSHZ1	teashirt zinc finger homeobox 1	anatomical structure development (GO:0048856)|anatomical structure morphogenesis (GO:0009653)|animal organ development (GO:0048513)|animal organ morphogenesis (GO:0009887)|anterior/posterior pattern specification (GO:0009952)|aromatic compound biosynthetic process (GO:0019438)|biological regulation (GO:0065007)|biological_process (GO:0008150)|biosynthetic process (GO:0009058)|cellular aromatic co…	binding (GO:0005488)|cation binding (GO:0043169)|DNA-binding transcription factor activity (GO:0003700)|DNA-binding transcription factor activity, RNA polymerase II-specific (GO:0000981)|DNA binding (GO:0003677)|heterocyclic compound binding (GO:1901363)|ion binding (GO:0043167)|metal ion binding (GO:0046872)|molecular_function (GO:0003674)|nucleic acid binding (GO:0003676)|organic cyclic compoun…	cellular anatomical entity (GO:0110165)|cellular_component (GO:0005575)|chromatin (GO:0000785)|chromosome (GO:0005694)|intracellular anatomical structure (GO:0005622)|intracellular membrane-bounded organelle (GO:0043231)|intracellular non-membrane-bounded organelle (GO:0043232)|intracellular organelle (GO:0043229)|membrane-bounded organelle (GO:0043227)|non-membrane-bounded organelle (GO:0043228)…		IL-18 signaling pathway (WP4754)	DOWN	-	-	-	-	-	P2	-0.0832315	0.0821366	-0.26099	-0.560764	-0.718697	-0.65241	-1.16865	-0.419881	-0.617808	-0.162374	0.242709	-0.184601	-0.601125	-0.323259	0.0860514	0.921698	-0.260409	-1.36566	0.12321	-0.636283	-0.64368	0.457416	0.171063	0.18518	-0.72597	0.0218551	0.0385496	-1.11462	-0.013425	0.206369	0.179298	0.139655	-0.053573	-0.879665	-0.246072	0.100844
ZNF239	zinc finger protein 239	aromatic compound biosynthetic process (GO:0019438)|biological regulation (GO:0065007)|biological_process (GO:0008150)|biosynthetic process (GO:0009058)|cellular aromatic compound metabolic process (GO:0006725)|cellular biosynthetic process (GO:0044249)|cellular macromolecule biosynthetic process (GO:0034645)|cellular macromolecule metabolic process (GO:0044260)|cellular metabolic process (GO:004…	binding (GO:0005488)|cation binding (GO:0043169)|cis-regulatory region sequence-specific DNA binding (GO:0000987)|DNA-binding transcription factor activity (GO:0003700)|DNA-binding transcription factor activity, RNA polymerase II-specific (GO:0000981)|DNA-binding transcription repressor activity (GO:0001217)|DNA-binding transcription repressor activity, RNA polymerase II-specific (GO:0001227)|DNA…	cellular anatomical entity (GO:0110165)|cellular_component (GO:0005575)|intracellular anatomical structure (GO:0005622)|intracellular membrane-bounded organelle (GO:0043231)|intracellular organelle (GO:0043229)|membrane-bounded organelle (GO:0043227)|nucleus (GO:0005634)|organelle (GO:0043226)			DOWN	-	-	-	-	-	P2	-0.207305	-0.0465668	-0.196172	-0.239957	-0.839621	-0.555141	-0.890282	-0.514526	-0.532712	-0.222039	0.509968	0.0475038	0.587672	0.678741	-0.424637	0.0851512	0.170915	0.163079	1.37775	0.0674049	-0.810348	-0.225122	0.178917	-0.611294	1.39791	0.0432728	-0.708702	-0.204423	0.0870744	0.205384	-0.203954	-0.21845	-0.781749	-0.776814	0.484301	0.64866
ZNF626	zinc finger protein 626	aromatic compound biosynthetic process (GO:0019438)|biological regulation (GO:0065007)|biological_process (GO:0008150)|biosynthetic process (GO:0009058)|cellular aromatic compound metabolic process (GO:0006725)|cellular biosynthetic process (GO:0044249)|cellular macromolecule biosynthetic process (GO:0034645)|cellular macromolecule metabolic process (GO:0044260)|cellular metabolic process (GO:004…	binding (GO:0005488)|cation binding (GO:0043169)|cis-regulatory region sequence-specific DNA binding (GO:0000987)|DNA-binding transcription factor activity (GO:0003700)|DNA-binding transcription factor activity, RNA polymerase II-specific (GO:0000981)|DNA binding (GO:0003677)|double-stranded DNA binding (GO:0003690)|heterocyclic compound binding (GO:1901363)|ion binding (GO:0043167)|metal ion bin…	cellular anatomical entity (GO:0110165)|cellular_component (GO:0005575)|intracellular anatomical structure (GO:0005622)|intracellular membrane-bounded organelle (GO:0043231)|intracellular organelle (GO:0043229)|membrane-bounded organelle (GO:0043227)|nucleus (GO:0005634)|organelle (GO:0043226)		Generic transcription pathway (WP1822)	DOWN	-	-	-	-	-	P2	-0.214788	-0.280361	0.0583681	-0.128218	-0.900598	-0.20777	-0.509156	-0.132613	-0.854891	-1.12877	-0.504448	0.54134	0.0383117	-1.27627e-05	1.35916	0.0864163	-0.691203	0.0795869	-0.593703	0.411846	0.0652312	0.0201231	-0.313192	0.768886	-1.2058	-0.139387	-0.278339	0.151947	-0.894349	-0.0874914	0.299317	-0.00886959	0.0742313	0.0220835	1.04616	-1.05559
ITGB3	integrin subunit beta 3	activation of protein kinase activity (GO:0032147)|ameboidal-type cell migration (GO:0001667)|amide transport (GO:0042886)|anatomical structure development (GO:0048856)|anatomical structure formation involved in morphogenesis (GO:0048646)|anatomical structure homeostasis (GO:0060249)|anatomical structure morphogenesis (GO:0009653)|angiogenesis (GO:0001525)|angiogenesis involved in wound healing (…	binding (GO:0005488)|C-X3-C chemokine binding (GO:0019960)|catalytic activity (GO:0003824)|catalytic activity, acting on a protein (GO:0140096)|cell adhesion molecule binding (GO:0050839)|chemokine binding (GO:0019956)|coreceptor activity (GO:0015026)|cytokine binding (GO:0019955)|cytokine receptor binding (GO:0005126)|enzyme binding (GO:0019899)|exogenous protein binding (GO:0140272)|extracellul…	actin-based cell projection (GO:0098858)|alphav-beta3 integrin-HMGB1 complex (GO:0035868)|alphav-beta3 integrin-IGF-1-IGF1R complex (GO:0035867)|alphav-beta3 integrin-PKCalpha complex (GO:0035866)|alphav-beta3 integrin-vitronectin complex (GO:0071062)|anchoring junction (GO:0070161)|bounding membrane of organelle (GO:0098588)|cell-cell junction (GO:0005911)|cell-substrate junction (GO:0030055)|ce…	hsa04015 Rap1 signaling pathway|hsa04145 Phagosome|hsa04151 PI3K-Akt signaling pathway|hsa04380 Osteoclast differentiation|hsa04510 Focal adhesion|hsa04512 ECM-receptor interaction|hsa04611 Platelet activation|hsa04640 Hematopoietic cell lineage|hsa04810 Regulation of actin cytoskeleton|hsa04919 Thyroid hormone signaling pathway|hsa05163 Human cytomegalovirus infection|hsa05165 Human papillomavir…	2q37 copy number variation syndrome (WP5224)|Arrhythmogenic right ventricular cardiomyopathy (WP2118)|Cell surface interactions at the vascular wall (WP1794)|Complement system (WP2806)|Complement system in neuronal development and plasticity (WP5090)|Ebola virus infection in host (WP4217)|Elastic fibre formation (WP2666)|Endothelin pathway (WP4857)|Extracellular matrix organization (WP2703)|Focal…	-	-	DOWN	-	-	-	P2	-0.711187	0.5193	-0.236763	-0.481034	-0.433788	0.529354	0.140898	-0.530861	0.286022	-0.719093	-0.663379	-0.33287	-0.495899	-0.338429	-0.0165755	-0.889976	-0.258867	-0.887818	-0.0843151	-0.649224	-0.421958	0.422672	0.251297	0.131619	-0.234459	0.590138	-0.284004	0.00419137	0.522029	0.543332	0.0384756	-0.95638	-0.708533	0.144017	-0.251652	-0.239418
CPED1	cadherin like and PC-esterase domain containing 1			cellular anatomical entity (GO:0110165)|cellular_component (GO:0005575)|cytoplasm (GO:0005737)|endomembrane system (GO:0012505)|endoplasmic reticulum (GO:0005783)|intracellular anatomical structure (GO:0005622)|intracellular membrane-bounded organelle (GO:0043231)|intracellular organelle (GO:0043229)|membrane-bounded organelle (GO:0043227)|organelle (GO:0043226)			-	-	-	-	DOWN	-	P2	-0.853901	0.546116	-0.232914	-1.06149	-0.324258	-0.985498	-0.00337589	-0.141967	-1.18417	-0.441382	-0.498017	0.561686	-0.703472	-0.0637896	0.376113	-0.20723	-0.67814	-0.243835	-0.368364	0.0339116	-0.950918	-0.487908	-0.485448	-0.247185	-1.02909	-0.89342	-0.427023	-1.188	-0.340875	0.186835	-0.606192	1.05404	0.327349	-0.432407	-0.196061	-0.363349
ACP2	acid phosphatase 2, lysosomal	biological_process (GO:0008150)|cellular component organization (GO:0016043)|cellular component organization or biogenesis (GO:0071840)|cellular metabolic process (GO:0044237)|cellular process (GO:0009987)|dephosphorylation (GO:0016311)|lysosome organization (GO:0007040)|lytic vacuole organization (GO:0080171)|metabolic process (GO:0008152)|organelle organization (GO:0006996)|phosphate-containing…	acid phosphatase activity (GO:0003993)|binding (GO:0005488)|catalytic activity (GO:0003824)|hydrolase activity (GO:0016787)|hydrolase activity, acting on ester bonds (GO:0016788)|molecular_function (GO:0003674)|phosphatase activity (GO:0016791)|phosphoric ester hydrolase activity (GO:0042578)|protein binding (GO:0005515)	bounding membrane of organelle (GO:0098588)|cellular anatomical entity (GO:0110165)|cellular_component (GO:0005575)|cytoplasm (GO:0005737)|extracellular exosome (GO:0070062)|extracellular organelle (GO:0043230)|extracellular region (GO:0005576)|extracellular space (GO:0005615)|extracellular vesicle (GO:1903561)|integral component of membrane (GO:0016021)|intracellular anatomical structure (GO:000…	hsa00740 Riboflavin metabolism|hsa01100 Metabolic pathways|hsa04142 Lysosome	miR-targeted genes in epithelium (WP2002)|miR-targeted genes in leukocytes (WP2003)|miR-targeted genes in lymphocytes (WP2004)|miR-targeted genes in muscle cell (WP2005)	-	-	-	DOWN	-	-	P2	-0.165407	-0.170365	0.36645	0.830283	-0.907129	-0.372918	0.0174632	0.141624	0.203659	-0.983987	-0.423994	0.373825	0.584884	-0.0806174	-0.150215	-0.207665	-0.705114	-0.295747	-0.288867	0.208445	-0.171429	0.460178	-1.08787	0.168086	0.88777	-0.809375	0.135099	0.00950873	0.129089	0.183577	-0.418386	-1.02483	0.370644	-0.893633	-0.198443	-0.198155
ACTB	actin beta	actin cytoskeleton organization (GO:0030036)|actin filament-based process (GO:0030029)|activation of immune response (GO:0002253)|adherens junction assembly (GO:0034333)|adherens junction organization (GO:0034332)|anatomical structure development (GO:0048856)|anatomical structure homeostasis (GO:0060249)|anatomical structure morphogenesis (GO:0009653)|animal organ development (GO:0048513)|anion t…	adenyl nucleotide binding (GO:0030554)|adenyl ribonucleotide binding (GO:0032559)|anion binding (GO:0043168)|ATP binding (GO:0005524)|binding (GO:0005488)|carbohydrate derivative binding (GO:0097367)|chromatin binding (GO:0003682)|chromatin DNA binding (GO:0031490)|cytoskeletal protein binding (GO:0008092)|DNA-binding transcription factor binding (GO:0140297)|DNA binding (GO:0003677)|enzyme bindi…	acetyltransferase complex (GO:1902493)|actin cytoskeleton (GO:0015629)|actin filament (GO:0005884)|adherens junction (GO:0005912)|anchoring junction (GO:0070161)|apical junction complex (GO:0043296)|axon (GO:0030424)|blood microparticle (GO:0072562)|catalytic complex (GO:1902494)|cell-cell junction (GO:0005911)|cell-substrate junction (GO:0030055)|cell junction (GO:0030054)|cell leading edge (GO:…	hsa04015 Rap1 signaling pathway|hsa04145 Phagosome|hsa04210 Apoptosis|hsa04390 Hippo signaling pathway|hsa04510 Focal adhesion|hsa04520 Adherens junction|hsa04530 Tight junction|hsa04611 Platelet activation|hsa04670 Leukocyte transendothelial migration|hsa04714 Thermogenesis|hsa04810 Regulation of actin cytoskeleton|hsa04919 Thyroid hormone signaling pathway|hsa04921 Oxytocin signaling pathway|hs…	Acute viral myocarditis (WP4298)|Arrhythmogenic right ventricular cardiomyopathy (WP2118)|B-WICH complex positively regulates rRNA expression (WP3819)|Chromatin organization (WP4096)|Common pathways underlying drug addiction (WP2636)|Deubiquitination (WP4102)|Ebola virus infection in host (WP4217)|EPH-Ephrin signaling (WP3309)|Fas ligand pathway and stress induction of heat shock proteins (WP314)…	-	-	DOWN	-	-	-	P3	0.0987737	-0.101722	-0.0355579	-0.444931	-0.242795	0.120737	0.107822	0.421413	-0.124357	0.266821	-0.468038	-0.477784	-0.246857	-0.579553	-0.127581	-0.19577	-0.228104	-1.12733	-0.898838	-1.38167	1.26349	0.0115487	-0.0588344	0.0663862	0.0503335	0.0735325	-0.137696	-0.17814	1.47606	0.400073	0.112656	-0.540254	0.204495	-0.0105659	-0.105055	0.173982
BIRC5	baculoviral IAP repeat containing 5	apoptotic process (GO:0006915)|aromatic compound biosynthetic process (GO:0019438)|biological regulation (GO:0065007)|biological_process (GO:0008150)|biosynthetic process (GO:0009058)|cell communication (GO:0007154)|cell cycle (GO:0007049)|cell death (GO:0008219)|cell division (GO:0051301)|cell population proliferation (GO:0008283)|cell surface receptor signaling pathway (GO:0007166)|cellular aro…	binding (GO:0005488)|cation binding (GO:0043169)|chaperone binding (GO:0051087)|cysteine-type endopeptidase inhibitor activity (GO:0004869)|cysteine-type endopeptidase inhibitor activity involved in apoptotic process (GO:0043027)|cysteine-type endopeptidase regulator activity involved in apoptotic process (GO:0043028)|cytoskeletal protein binding (GO:0008092)|endopeptidase inhibitor activity (GO:…	cellular anatomical entity (GO:0110165)|cellular_component (GO:0005575)|chromosomal region (GO:0098687)|chromosome (GO:0005694)|chromosome passenger complex (GO:0032133)|chromosome, centromeric region (GO:0000775)|condensed chromosome (GO:0000793)|condensed chromosome kinetochore (GO:0000777)|condensed chromosome, centromeric region (GO:0000779)|cytoplasm (GO:0005737)|cytoskeleton (GO:0005856)|cy…	hsa01524 Platinum drug resistance|hsa04210 Apoptosis|hsa04215 Apoptosis - multiple species|hsa04390 Hippo signaling pathway|hsa05161 Hepatitis B|hsa05200 Pathways in cancer|hsa05210 Colorectal cancer	Apoptosis-related network due to altered Notch3 in ovarian cancer (WP2864)|Apoptosis (WP254)|Apoptosis modulation and signaling (WP1772)|Cell cycle checkpoints (WP1775)|Chromosomal and microsatellite instability in colorectal cancer (WP4216)|Extracellular vesicles in the crosstalk of cardiac cells (WP4300)|Gastrin signaling pathway (WP4659)|Hepatitis B infection (WP4666)|Hepatitis C and hepatocel…	-	-	DOWN	-	-	-	P3	0.331621	0.17737	0.685851	-0.403221	-0.788888	0.0954373	0.465497	0.755662	-0.282854	-0.239412	-0.476666	-0.271467	-0.595595	-0.0255014	-0.795593	-0.636298	-0.748695	-1.31801	-1.72371	-1.59039	1.1511	-0.80856	0.749418	-0.175816	-0.403218	-0.768876	-0.538888	-0.584931	0.36149	0.909668	0.448361	-0.724687	-0.646141	0.239203	-0.199347	-0.561594
CLSPN	claspin	activation of protein kinase activity (GO:0032147)|biological regulation (GO:0065007)|biological_process (GO:0008150)|biosynthetic process (GO:0009058)|cell cycle (GO:0007049)|cell cycle checkpoint (GO:0000075)|cell cycle G2/M phase transition (GO:0044839)|cell cycle phase transition (GO:0044770)|cell cycle process (GO:0022402)|cellular aromatic compound metabolic process (GO:0006725)|cellular bi…	anaphase-promoting complex binding (GO:0010997)|binding (GO:0005488)|DNA binding (GO:0003677)|DNA secondary structure binding (GO:0000217)|heterocyclic compound binding (GO:1901363)|molecular_function (GO:0003674)|nucleic acid binding (GO:0003676)|organic cyclic compound binding (GO:0097159)|protein-containing complex binding (GO:0044877)|protein binding (GO:0005515)	cellular anatomical entity (GO:0110165)|cellular_component (GO:0005575)|cytoplasm (GO:0005737)|endomembrane system (GO:0012505)|Golgi apparatus (GO:0005794)|intracellular anatomical structure (GO:0005622)|intracellular membrane-bounded organelle (GO:0043231)|intracellular organelle (GO:0043229)|intracellular organelle lumen (GO:0070013)|membrane-bounded organelle (GO:0043227)|membrane-enclosed lu…		Apoptotic execution phase (WP1784)|Cell cycle checkpoints (WP1775)|Deubiquitination (WP4102)|DNA IR-damage and cellular response via ATR (WP4016)|HDR through Homologous Recombination (HRR) or Single Strand Annealing (SSA) (WP3567)	-	-	DOWN	-	-	-	P3	-0.0457722	0.350316	-0.265221	-1.01618	-0.572752	0.455657	-0.161793	-0.686293	0.283391	1.31418	-0.450159	-0.525661	-0.608927	-0.990098	-0.996799	-0.387994	-0.563074	-0.184033	-0.0716982	-0.316733	0.856076	-0.258595	-0.417724	0.13565	-0.732945	0.022553	-1.06491	0.840803	-0.184187	0.00886951	-0.584067	0.063902	0.291386	-0.173348	0.101934	-0.243954
FANCD2	FA complementation group D2	anatomical structure development (GO:0048856)|anatomical structure morphogenesis (GO:0009653)|animal organ development (GO:0048513)|animal organ morphogenesis (GO:0009887)|aromatic compound biosynthetic process (GO:0019438)|biological regulation (GO:0065007)|biological_process (GO:0008150)|biosynthetic process (GO:0009058)|brain development (GO:0007420)|brain morphogenesis (GO:0048854)|CD40 signa…	binding (GO:0005488)|DNA polymerase binding (GO:0070182)|enzyme binding (GO:0019899)|molecular_function (GO:0003674)|protein binding (GO:0005515)	cellular anatomical entity (GO:0110165)|cellular_component (GO:0005575)|chromosome (GO:0005694)|condensed chromosome (GO:0000793)|cytoplasm (GO:0005737)|cytosol (GO:0005829)|intracellular anatomical structure (GO:0005622)|intracellular membrane-bounded organelle (GO:0043231)|intracellular non-membrane-bounded organelle (GO:0043232)|intracellular organelle (GO:0043229)|intracellular organelle lume…	hsa03460 Fanconi anemia pathway	15q13.3 copy number variation syndrome (WP4942)|ATM signaling pathway (WP2516)|DNA damage response (WP707)|DNA IR-damage and cellular response via ATR (WP4016)|DNA IR-double strand breaks and cellular response via ATM (WP3959)|DNA repair pathways, full network (WP4946)|Fanconi Anemia Pathway (WP3569)|miRNA regulation of DNA damage response (WP1530)|TP53 Regulates Transcription of DNA Repair Genes…	-	-	DOWN	-	-	-	P3	-0.104095	0.305248	0.556536	0.125418	0.291598	0.0428942	0.0477004	0.368819	0.178532	0.492337	-0.359611	-0.53949	-1.05037	-0.232317	-0.315147	-0.311129	-0.00625323	-1.25848	-0.985215	-1.1113	0.938518	-0.0240241	0.408135	0.195105	-0.146978	0.0763972	-0.0755365	-1.12564	1.85113	0.967761	-0.406404	-0.146182	0.00573456	-0.279446	1.1172	0.0871315
GJA4	gap junction protein alpha 4	anatomical structure development (GO:0048856)|biological_process (GO:0008150)|blood vessel development (GO:0001568)|calcium ion transport (GO:0006816)|cation transport (GO:0006812)|cell-cell junction assembly (GO:0007043)|cell-cell junction organization (GO:0045216)|cell-cell signaling (GO:0007267)|cell communication (GO:0007154)|cell junction assembly (GO:0034329)|cell junction organization (GO:…	binding (GO:0005488)|channel activity (GO:0015267)|gap junction channel activity (GO:0005243)|molecular_function (GO:0003674)|passive transmembrane transporter activity (GO:0022803)|protein binding (GO:0005515)|transmembrane transporter activity (GO:0022857)|transporter activity (GO:0005215)|wide pore channel activity (GO:0022829)	anchoring junction (GO:0070161)|cell-cell junction (GO:0005911)|cell junction (GO:0030054)|cell periphery (GO:0071944)|cellular anatomical entity (GO:0110165)|cellular_component (GO:0005575)|connexin complex (GO:0005922)|gap junction (GO:0005921)|integral component of membrane (GO:0016021)|integral component of plasma membrane (GO:0005887)|intrinsic component of membrane (GO:0031224)|intrinsic co…		Calcium regulation in cardiac cells (WP536)|Gap junction trafficking and regulation (WP1820)|Ovarian infertility (WP34)	-	-	DOWN	-	-	-	P3	-0.0615409	-1.10079	-0.0363212	0.019149	0.491645	-0.903963	-0.105056	-0.270359	-0.0508234	0.523831	-0.721397	-0.97105	-0.75337	-0.0573048	-0.440659	-0.188172	-0.57864	-1.32159	-0.218202	-0.809659	-1.4545	0.091052	0.693968	-0.16379	-0.363571	-0.71537	-0.10065	-0.6524	-0.535104	0.986652	0.135972	-0.438651	-0.675878	0.864168	0.110036	-0.879641
HNRNPL	heterogeneous nuclear ribonucleoprotein L	alternative mRNA splicing, via spliceosome (GO:0000380)|biological regulation (GO:0065007)|biological_process (GO:0008150)|cellular aromatic compound metabolic process (GO:0006725)|cellular metabolic process (GO:0044237)|cellular nitrogen compound metabolic process (GO:0034641)|cellular process (GO:0009987)|gene expression (GO:0010467)|heterocycle metabolic process (GO:0046483)|macromolecule meta…	binding (GO:0005488)|DNA binding (GO:0003677)|double-stranded DNA binding (GO:0003690)|heterocyclic compound binding (GO:1901363)|molecular_function (GO:0003674)|mRNA binding (GO:0003729)|nucleic acid binding (GO:0003676)|organic cyclic compound binding (GO:0097159)|pre-mRNA binding (GO:0036002)|pre-mRNA intronic binding (GO:0097157)|protein binding (GO:0005515)|regulatory region nucleic acid bin…	cellular anatomical entity (GO:0110165)|cellular_component (GO:0005575)|cytoplasm (GO:0005737)|extracellular exosome (GO:0070062)|extracellular organelle (GO:0043230)|extracellular region (GO:0005576)|extracellular space (GO:0005615)|extracellular vesicle (GO:1903561)|intracellular anatomical structure (GO:0005622)|intracellular membrane-bounded organelle (GO:0043231)|intracellular non-membrane-b…		mRNA processing (WP411)|Processing of Capped Intron-Containing Pre-mRNA (WP1889)	-	-	DOWN	-	-	-	P3	0.449918	0.0628431	-0.253421	-0.678621	-0.895294	0.458185	0.646787	1.23688	0.368497	1.00727	-0.620346	-1.56529	-0.332622	-1.25113	-0.527992	0.0130894	-0.631631	-0.627101	-0.60629	-1.02553	0.583379	0.501368	0.4809	-0.278516	-0.751899	-1.36026	0.858471	-0.627189	2.12183	0.360582	0.744314	-0.352182	0.350714	0.235041	0.592129	0.311484
LOC101927752	-	-	-	-	-	-	-	-	DOWN	-	-	-	P3	0.320896	-0.16905	0.199175	0.744532	-1.38295	-0.0589262	-1.14843	0.603246	0.788367	-0.111295	-0.149565	-0.477513	-0.427201	-0.0770535	-0.488967	-0.372846	-0.289962	-0.589871	-0.192667	-0.471698	-0.076062	-0.150527	-0.192188	0.281777	0.102057	-0.83222	-0.690051	-0.286869	0.155787	-1.1422	0.805738	0.209487	0.579041	-0.147672	-0.747256	-1.43201
SPC24	SPC24 component of NDC80 kinetochore complex	biological_process (GO:0008150)|cell cycle (GO:0007049)|cell division (GO:0051301)|cellular process (GO:0009987)	binding (GO:0005488)|molecular_function (GO:0003674)|protein binding (GO:0005515)	cellular anatomical entity (GO:0110165)|cellular_component (GO:0005575)|chromosomal region (GO:0098687)|chromosome (GO:0005694)|chromosome, centromeric region (GO:0000775)|condensed chromosome (GO:0000793)|condensed chromosome kinetochore (GO:0000777)|condensed chromosome, centromeric region (GO:0000779)|cytoplasm (GO:0005737)|cytosol (GO:0005829)|intracellular anatomical structure (GO:0005622)|i…		Cell cycle checkpoints (WP1775)|Mitotic Metaphase and Anaphase (WP2757)|Mitotic Prometaphase (WP2652)|RHO GTPases activate formins (WP3379)	-	-	DOWN	-	-	-	P3	0.0511188	0.000822588	-0.331306	-0.253292	0.32052	0.30904	0.250195	0.0758144	0.272701	0.179606	0.0479667	-0.575397	-0.522303	-0.453958	-0.261057	-0.586625	-0.708091	-0.665613	-0.689362	-1.40782	1.07229	-1.14909	-0.520833	-1.10862	-0.333575	-0.699113	-0.10567	-0.551977	0.658629	1.33511	-1.22216	-0.0564526	0.324905	0.000986786	-1.28211	1.13874
TRIM2	tripartite motif containing 2	apoptotic process (GO:0006915)|biological regulation (GO:0065007)|biological_process (GO:0008150)|catabolic process (GO:0009056)|cell death (GO:0008219)|cellular catabolic process (GO:0044248)|cellular macromolecule catabolic process (GO:0044265)|cellular macromolecule metabolic process (GO:0044260)|cellular metabolic process (GO:0044237)|cellular process (GO:0009987)|cellular protein catabolic p…	binding (GO:0005488)|catalytic activity (GO:0003824)|catalytic activity, acting on a protein (GO:0140096)|cation binding (GO:0043169)|ion binding (GO:0043167)|metal ion binding (GO:0046872)|molecular_function (GO:0003674)|protein binding (GO:0005515)|transferase activity (GO:0016740)|transition metal ion binding (GO:0046914)|ubiquitin-like protein ligase activity (GO:0061659)|ubiquitin-like prote…	cellular anatomical entity (GO:0110165)|cellular_component (GO:0005575)|cytoplasm (GO:0005737)|intracellular anatomical structure (GO:0005622)		Interferon gamma signaling (WP1836)	-	-	DOWN	-	-	-	P3	-0.612887	0.159736	0.302855	0.481962	-0.88975	0.304099	-0.232448	-0.538677	-0.0805357	-1.16159	-0.842056	-0.436637	-0.344972	-0.571827	-0.397472	-0.192053	-0.655144	-0.0823807	0.0661297	-0.620037	0.950617	-0.44536	0.117135	-0.965585	0.425718	0.0720763	0.00198552	0.0120335	0.267906	0.793301	-0.0363014	0.0590208	-0.0171576	0.755945	0.232405	-0.461943
ZNF709	zinc finger protein 709	aromatic compound biosynthetic process (GO:0019438)|biological regulation (GO:0065007)|biological_process (GO:0008150)|biosynthetic process (GO:0009058)|cellular aromatic compound metabolic process (GO:0006725)|cellular biosynthetic process (GO:0044249)|cellular macromolecule biosynthetic process (GO:0034645)|cellular macromolecule metabolic process (GO:0044260)|cellular metabolic process (GO:004…	binding (GO:0005488)|cation binding (GO:0043169)|DNA-binding transcription factor activity (GO:0003700)|DNA-binding transcription factor activity, RNA polymerase II-specific (GO:0000981)|DNA binding (GO:0003677)|double-stranded DNA binding (GO:0003690)|heterocyclic compound binding (GO:1901363)|ion binding (GO:0043167)|metal ion binding (GO:0046872)|molecular_function (GO:0003674)|nucleic acid bi…	cellular anatomical entity (GO:0110165)|cellular_component (GO:0005575)|intracellular anatomical structure (GO:0005622)|intracellular membrane-bounded organelle (GO:0043231)|intracellular organelle (GO:0043229)|membrane-bounded organelle (GO:0043227)|nucleus (GO:0005634)|organelle (GO:0043226)	hsa05168 Herpes simplex virus 1 infection	Generic transcription pathway (WP1822)	-	-	DOWN	-	-	-	P3	0.308742	-0.0536581	-0.62744	0.841967	-0.373584	0.212921	0.190732	-0.0225	0.28959	0.386639	-0.477754	-1.16918	-0.344276	-0.384244	-0.835061	-0.603977	-0.486714	-0.334637	-0.473912	-0.793471	-0.11854	-0.908838	0.755377	0.229542	0.20526	-0.673899	1.71256	-0.785006	0.532038	0.582237	-0.611839	0.515052	0.281188	0.560249	-0.899567	0.199499
GPC3	glypican 3	ameboidal-type cell migration (GO:0001667)|aminoglycan biosynthetic process (GO:0006023)|aminoglycan catabolic process (GO:0006026)|aminoglycan metabolic process (GO:0006022)|anatomical structure development (GO:0048856)|anatomical structure morphogenesis (GO:0009653)|animal organ development (GO:0048513)|animal organ morphogenesis (GO:0009887)|anion transmembrane transport (GO:0098656)|anion tra…	binding (GO:0005488)|enzyme inhibitor activity (GO:0004857)|enzyme regulator activity (GO:0030234)|molecular function regulator (GO:0098772)|molecular_function (GO:0003674)|peptidase inhibitor activity (GO:0030414)|peptidase regulator activity (GO:0061134)|peptidyl-dipeptidase inhibitor activity (GO:0060422)|protein binding (GO:0005515)	anchored component of membrane (GO:0031225)|anchored component of plasma membrane (GO:0046658)|cell periphery (GO:0071944)|cell surface (GO:0009986)|cellular anatomical entity (GO:0110165)|cellular_component (GO:0005575)|collagen-containing extracellular matrix (GO:0062023)|cytoplasm (GO:0005737)|endomembrane system (GO:0012505)|endoplasmic reticulum (GO:0005783)|endoplasmic reticulum lumen (GO:0…	hsa05205 Proteoglycans in cancer	Development of ureteric collection system (WP5053)|Glycosaminoglycan metabolism (WP2743)|Post-translational protein phosphorylation (WP4110)|Regulation of IGF transport and uptake by IGF binding proteins (WP2799)	-	-	DOWN	-	-	DOWN	P4	0.218498	-0.406866	-0.284788	-0.286791	-0.547826	0.0322978	0.291939	0.905287	-0.303806	0.849876	-1.65228	-0.708909	-0.740536	-0.949508	-0.709831	-0.112783	0.132673	-1.30306	-1.37465	-2.28791	0.413585	-0.888214	-0.0252816	-0.943155	-0.753292	-0.381164	-0.172437	-0.982443	1.80021	0.279277	-0.591125	-0.35386	-0.287182	-0.206294	0.609417	0.00535439
MATN2	matrilin 2	biological_process (GO:0008150)	binding (GO:0005488)|calcium ion binding (GO:0005509)|cation binding (GO:0043169)|extracellular matrix structural constituent (GO:0005201)|ion binding (GO:0043167)|metal ion binding (GO:0046872)|molecular_function (GO:0003674)|protein binding (GO:0005515)|structural molecule activity (GO:0005198)	cell periphery (GO:0071944)|cellular anatomical entity (GO:0110165)|cellular_component (GO:0005575)|collagen-containing extracellular matrix (GO:0062023)|external encapsulating structure (GO:0030312)|extracellular matrix (GO:0031012)			-	-	DOWN	-	-	-	P4	-0.748433	0.0181526	0.534475	-0.751009	0.0661078	-0.496371	0.293653	-0.302216	-0.686548	0.358869	-0.616974	-0.326885	-0.911779	-0.731813	-0.89284	-0.922474	-0.11323	-0.367923	-0.249701	-1.03534	-1.17637	0.262983	-0.810727	-0.403602	0.172944	-0.172209	-0.287585	0.0149707	-0.808757	-0.509154	0.272265	0.129111	-0.724336	-0.347125	-0.248037	-0.444539
PDGFC	platelet derived growth factor C	activation of protein kinase activity (GO:0032147)|activation of transmembrane receptor protein tyrosine kinase activity (GO:0007171)|adaptive thermogenesis (GO:1990845)|anatomical structure development (GO:0048856)|anatomical structure morphogenesis (GO:0009653)|animal organ development (GO:0048513)|animal organ morphogenesis (GO:0009887)|biological regulation (GO:0065007)|biological_process (GO…	binding (GO:0005488)|growth factor activity (GO:0008083)|growth factor receptor binding (GO:0070851)|identical protein binding (GO:0042802)|molecular function regulator (GO:0098772)|molecular_function (GO:0003674)|platelet-derived growth factor receptor binding (GO:0005161)|protein binding (GO:0005515)|protein dimerization activity (GO:0046983)|protein homodimerization activity (GO:0042803)|recep…	bounding membrane of organelle (GO:0098588)|cell periphery (GO:0071944)|cell surface (GO:0009986)|cellular anatomical entity (GO:0110165)|cellular_component (GO:0005575)|cytoplasm (GO:0005737)|cytosol (GO:0005829)|endomembrane system (GO:0012505)|endoplasmic reticulum (GO:0005783)|endoplasmic reticulum lumen (GO:0005788)|extracellular exosome (GO:0070062)|extracellular organelle (GO:0043230)|extr…	hsa01521 EGFR tyrosine kinase inhibitor resistance|hsa04010 MAPK signaling pathway|hsa04014 Ras signaling pathway|hsa04015 Rap1 signaling pathway|hsa04020 Calcium signaling pathway|hsa04072 Phospholipase D signaling pathway|hsa04151 PI3K-Akt signaling pathway|hsa04510 Focal adhesion|hsa04540 Gap junction|hsa04810 Regulation of actin cytoskeleton|hsa05215 Prostate cancer|hsa05218 Melanoma|hsa05231…	EGFR tyrosine kinase inhibitor resistance (WP4806)|Focal adhesion (WP306)|Focal adhesion: PI3K-Akt-mTOR-signaling pathway (WP3932)|Malignant pleural mesothelioma (WP5087)|PI3K-Akt signaling pathway (WP4172)	-	-	DOWN	-	-	-	P4	-0.380595	-0.184639	0.169932	0.418376	0.221438	-0.111569	0.0895467	-0.0790944	-0.405657	0.267207	-0.150468	-0.194282	-0.302002	-0.786925	-0.65389	-0.214922	-0.56847	-1.35706	-0.374287	-1.02721	1.15994	-0.947116	-0.227764	-1.37225	-0.273474	-0.210797	-0.106741	0.0132542	0.790978	0.401122	-0.996337	0.274218	0.676702	0.356816	0.496665	0.0740138
WFDC1	WAP four-disulfide core domain 1	biological regulation (GO:0065007)|biological_process (GO:0008150)|cell growth (GO:0016049)|cell population proliferation (GO:0008283)|cellular component organization (GO:0016043)|cellular component organization or biogenesis (GO:0071840)|cellular macromolecule metabolic process (GO:0044260)|cellular metabolic process (GO:0044237)|cellular process (GO:0009987)|cellular protein metabolic process (…	endopeptidase inhibitor activity (GO:0004866)|endopeptidase regulator activity (GO:0061135)|enzyme inhibitor activity (GO:0004857)|enzyme regulator activity (GO:0030234)|molecular function regulator (GO:0098772)|molecular_function (GO:0003674)|peptidase inhibitor activity (GO:0030414)|peptidase regulator activity (GO:0061134)|serine-type endopeptidase inhibitor activity (GO:0004867)	cellular anatomical entity (GO:0110165)|cellular_component (GO:0005575)|extracellular region (GO:0005576)|extracellular space (GO:0005615)			-	-	DOWN	-	DOWN	-	P4	-0.658579	-0.0696818	-0.915536	-0.487728	0.871132	-1.13206	0.110378	-0.890917	-0.275032	0.0470479	-1.34282	-0.876923	-1.23246	-0.485632	-0.537672	-0.463486	-0.295335	-0.753195	-0.392103	-1.26721	-0.908322	-0.590037	-1.76578	-0.750778	0.199082	-1.07928	-1.92403	-1.13899	-1.73934	-0.542628	0.130501	0.222743	-0.445927	0.933292	-0.899761	0.349762
HADH	hydroxyacyl-CoA dehydrogenase	adaptive thermogenesis (GO:1990845)|amide transport (GO:0042886)|anion transport (GO:0006820)|biological regulation (GO:0065007)|biological_process (GO:0008150)|carboxylic acid catabolic process (GO:0046395)|carboxylic acid metabolic process (GO:0019752)|catabolic process (GO:0009056)|cell-cell signaling (GO:0007267)|cell communication (GO:0007154)|cellular catabolic process (GO:0044248)|cellular…	3-hydroxyacyl-CoA dehydrogenase activity (GO:0003857)|anion binding (GO:0043168)|binding (GO:0005488)|catalytic activity (GO:0003824)|heterocyclic compound binding (GO:1901363)|identical protein binding (GO:0042802)|ion binding (GO:0043167)|molecular_function (GO:0003674)|NAD binding (GO:0051287)|NAD+ binding (GO:0070403)|nucleoside phosphate binding (GO:1901265)|nucleotide binding (GO:0000166)|o…	cellular anatomical entity (GO:0110165)|cellular_component (GO:0005575)|cytoplasm (GO:0005737)|intracellular anatomical structure (GO:0005622)|intracellular membrane-bounded organelle (GO:0043231)|intracellular organelle (GO:0043229)|intracellular organelle lumen (GO:0070013)|membrane-bounded organelle (GO:0043227)|membrane-enclosed lumen (GO:0031974)|mitochondrial matrix (GO:0005759)|mitochondri…	hsa00062 Fatty acid elongation|hsa00071 Fatty acid degradation|hsa00280 Valine, leucine and isoleucine degradation|hsa00310 Lysine degradation|hsa00380 Tryptophan metabolism|hsa00650 Butanoate metabolism|hsa01100 Metabolic pathways|hsa01212 Fatty acid metabolism	Amino acid metabolism (WP3925)|Fatty acid beta-oxidation (WP143)|Fatty acid biosynthesis (WP357)|IL-18 signaling pathway (WP4754)|Mitochondrial fatty acid beta-oxidation (WP4034)|Mitochondrial fatty acid oxidation disorders (WP5123)|Mitochondrial long chain fatty acid beta-oxidation (WP368)|Tryptophan metabolism (WP465)	-	-	-	-	DOWN	-	P4	0.187589	0.0116112	0.00612338	0.0441501	-0.0115901	-0.258116	-0.203892	0.0100023	0.0395145	-0.527323	-0.192392	0.0681793	0.05885	0.137746	-0.184097	-0.121985	0.297355	-0.161654	-0.480021	-0.69359	-0.433552	-0.48409	-0.762026	-0.562752	-0.699149	0.00194423	-0.338823	-0.383355	-0.667659	-0.414862	0.959551	0.0835655	-0.519382	0.312541	0.397009	0.142137
TMEM98	transmembrane protein 98	adaptive immune response (GO:0002250)|adaptive immune response based on somatic recombination of immune receptors built from immunoglobulin superfamily domains (GO:0002460)|alpha-beta T cell activation (GO:0046631)|alpha-beta T cell activation involved in immune response (GO:0002287)|alpha-beta T cell differentiation (GO:0046632)|alpha-beta T cell differentiation involved in immune response (GO:0…	binding (GO:0005488)|molecular_function (GO:0003674)|protein binding (GO:0005515)	cell periphery (GO:0071944)|cellular anatomical entity (GO:0110165)|cellular_component (GO:0005575)|cytoplasm (GO:0005737)|endomembrane system (GO:0012505)|endoplasmic reticulum (GO:0005783)|endoplasmic reticulum membrane (GO:0005789)|endoplasmic reticulum subcompartment (GO:0098827)|extracellular exosome (GO:0070062)|extracellular organelle (GO:0043230)|extracellular region (GO:0005576)|extracel…		Kallmann syndrome (WP5074)	-	-	-	-	DOWN	-	P4	-0.339507	0.308787	-0.196138	0.088085	-0.022862	0.0113033	-0.180986	0.0335895	-0.556879	0.244341	0.0491148	-0.524866	-0.782498	-0.602455	-0.223038	-0.0663775	0.0419207	-0.0832376	0.110249	0.473195	-0.484889	-0.272315	-0.414806	-0.719918	-0.0305269	-0.54728	-0.80295	-0.245836	-0.36751	-0.0805939	0.281712	-0.73008	0.299174	0.198459	0.0628791	-0.230112
ALAS1	5'-aminolevulinate synthase 1	anatomical structure development (GO:0048856)|animal organ development (GO:0048513)|aromatic compound biosynthetic process (GO:0019438)|biological regulation (GO:0065007)|biological_process (GO:0008150)|biosynthetic process (GO:0009058)|cell development (GO:0048468)|cell differentiation (GO:0030154)|cellular aromatic compound metabolic process (GO:0006725)|cellular biosynthetic process (GO:004424…	5-aminolevulinate synthase activity (GO:0003870)|anion binding (GO:0043168)|binding (GO:0005488)|catalytic activity (GO:0003824)|heterocyclic compound binding (GO:1901363)|identical protein binding (GO:0042802)|ion binding (GO:0043167)|molecular_function (GO:0003674)|N-acyltransferase activity (GO:0016410)|N-succinyltransferase activity (GO:0016749)|organic cyclic compound binding (GO:0097159)|pr…	cellular anatomical entity (GO:0110165)|cellular_component (GO:0005575)|cytoplasm (GO:0005737)|cytosol (GO:0005829)|intracellular anatomical structure (GO:0005622)|intracellular membrane-bounded organelle (GO:0043231)|intracellular organelle (GO:0043229)|intracellular organelle lumen (GO:0070013)|membrane-bounded organelle (GO:0043227)|membrane-enclosed lumen (GO:0031974)|mitochondrial matrix (GO…	hsa00260 Glycine, serine and threonine metabolism|hsa00860 Porphyrin and chlorophyll metabolism|hsa01100 Metabolic pathways|hsa01240 Biosynthesis of cofactors	Constitutive androstane receptor pathway (WP2875)|Heme biosynthesis (WP561)|Hemesynthesis defects and porphyrias (WP5169)|Metabolism of porphyrins (WP1852)|Mitochondrial biogenesis (WP3331)|Nuclear receptors meta-pathway (WP2882)|Regulation of lipid metabolism by PPARalpha (WP2797)	-	-	-	-	-	DOWN	P4	-0.732415	-0.565686	-0.22742	-0.116157	0.283047	-0.217292	-0.0634012	-0.686066	-0.0881549	0.303548	-0.0946494	-0.306806	-0.295046	-0.981976	0.037555	-0.1191	-0.746154	0.270478	0.634084	-0.130093	-0.516723	0.436595	-0.749379	-0.537559	-0.00472001	-0.529619	0.166682	0.511062	-0.0954114	0.647821	-0.420669	-0.889873	-0.204733	-0.422944	-1.02503	-0.017851
CYP17A1	cytochrome P450 family 17 subfamily A member 1	androgen biosynthetic process (GO:0006702)|androgen metabolic process (GO:0008209)|biological regulation (GO:0065007)|biological_process (GO:0008150)|biosynthetic process (GO:0009058)|C21-steroid hormone metabolic process (GO:0008207)|cellular biosynthetic process (GO:0044249)|cellular hormone metabolic process (GO:0034754)|cellular ketone metabolic process (GO:0042180)|cellular metabolic process…	17-alpha-hydroxyprogesterone aldolase activity (GO:0047442)|aldehyde-lyase activity (GO:0016832)|binding (GO:0005488)|carbon-carbon lyase activity (GO:0016830)|catalytic activity (GO:0003824)|cation binding (GO:0043169)|heme binding (GO:0020037)|heterocyclic compound binding (GO:1901363)|ion binding (GO:0043167)|iron ion binding (GO:0005506)|lyase activity (GO:0016829)|metal ion binding (GO:00468…	cellular anatomical entity (GO:0110165)|cellular_component (GO:0005575)|cytoplasm (GO:0005737)|endomembrane system (GO:0012505)|endoplasmic reticulum (GO:0005783)|endoplasmic reticulum membrane (GO:0005789)|endoplasmic reticulum subcompartment (GO:0098827)|intracellular anatomical structure (GO:0005622)|intracellular membrane-bounded organelle (GO:0043231)|intracellular organelle (GO:0043229)|mem…	hsa00140 Steroid hormone biosynthesis|hsa01100 Metabolic pathways|hsa04913 Ovarian steroidogenesis|hsa04917 Prolactin signaling pathway|hsa04927 Cortisol synthesis and secretion|hsa04934 Cushing syndrome	Alternative pathway of fetal androgen synthesis (WP4524)|Androgen receptor network in prostate cancer (WP2263)|Classical pathway of steroidogenesis with glucocorticoid and mineralocorticoid metabolism (WP4523)|Male infertility (WP4673)|Metabolism of steroid hormones (WP2749)|Metapathway biotransformation Phase I and II (WP702)|Oxidation by cytochrome P450 (WP43)|Steroid biosynthesis (WP496)|Stero…	-	-	-	-	-	DOWN	P4	-0.900642	-0.655648	-0.0502523	0.468463	-0.148893	0.373085	-0.363301	-0.468665	-1.35927	0.00513563	-0.331647	0.00886544	-0.0724464	0.0135897	0.162336	-0.929352	-0.574568	0.428458	0.302683	0.375186	-1.58337	-1.16554	-1.72192	0.0995314	-0.512069	0.689397	-0.144974	-0.416777	-0.785548	-0.0716578	-0.224273	0.651448	-1.11246	-0.631867	-1.05516	-0.144683
LDLR	low density lipoprotein receptor	acylglycerol biosynthetic process (GO:0046463)|acylglycerol metabolic process (GO:0006639)|alcohol metabolic process (GO:0006066)|amyloid-beta clearance (GO:0097242)|amyloid-beta clearance by cellular catabolic process (GO:0150094)|amyloid fibril formation (GO:1990000)|anatomical structure development (GO:0048856)|anion transport (GO:0006820)|astrocyte activation (GO:0048143)|astrocyte developmen…	amide binding (GO:0033218)|amyloid-beta binding (GO:0001540)|binding (GO:0005488)|calcium ion binding (GO:0005509)|cargo receptor activity (GO:0038024)|cation binding (GO:0043169)|clathrin binding (GO:0030276)|clathrin heavy chain binding (GO:0032050)|enzyme binding (GO:0019899)|exogenous protein binding (GO:0140272)|identical protein binding (GO:0042802)|ion binding (GO:0043167)|lipoprotein part…	apical part of cell (GO:0045177)|basal part of cell (GO:0045178)|basal plasma membrane (GO:0009925)|basolateral plasma membrane (GO:0016323)|bounding membrane of organelle (GO:0098588)|cell periphery (GO:0071944)|cell surface (GO:0009986)|cellular anatomical entity (GO:0110165)|cellular_component (GO:0005575)|clathrin-coated endocytic vesicle (GO:0045334)|clathrin-coated endocytic vesicle membran…	hsa04144 Endocytosis|hsa04913 Ovarian steroidogenesis|hsa04925 Aldosterone synthesis and secretion|hsa04927 Cortisol synthesis and secretion|hsa04934 Cushing syndrome|hsa04976 Bile secretion|hsa04979 Cholesterol metabolism|hsa05145 Toxoplasmosis|hsa05160 Hepatitis C	Bile acids synthesis and enterohepatic circulation (WP4389)|Clathrin-mediated endocytosis (WP4065)|DNA damage response (only ATM dependent) (WP710)|Evolocumab mechanism to reduce LDL cholesterol (WP3408)|Familial hyperlipidemia type 1 (WP5108)|Familial hyperlipidemia type 2 (WP5109)|Familial hyperlipidemia type 3 (WP5110)|Familial hyperlipidemia type 4 (WP5111)|Familial hyperlipidemia type 5 (WP5…	-	-	-	-	-	DOWN	P4	-0.37291	-0.35881	-0.767422	-0.914478	0.65198	0.190698	-1.26561	0.315547	-0.574911	0.432428	-0.152974	-0.369083	-0.00520292	-0.238657	0.06471	-0.504798	-0.15961	-0.842562	-0.0615824	-0.406592	-0.700458	0.191957	-0.512904	0.719305	0.17675	-0.361475	-0.786602	-0.324983	0.669468	0.0354457	-0.815186	-0.0970512	-1.28101	-0.520848	1.46955	-0.24662
PCLAF	PCNA clamp associated factor	aromatic compound biosynthetic process (GO:0019438)|biological regulation (GO:0065007)|biological_process (GO:0008150)|biosynthetic process (GO:0009058)|cell cycle (GO:0007049)|cell cycle process (GO:0022402)|cellular aromatic compound metabolic process (GO:0006725)|cellular biosynthetic process (GO:0044249)|cellular component organization (GO:0016043)|cellular component organization or biogenesi…	binding (GO:0005488)|chromatin binding (GO:0003682)|molecular_function (GO:0003674)|protein binding (GO:0005515)	cellular anatomical entity (GO:0110165)|cellular_component (GO:0005575)|centrosome (GO:0005813)|cytoplasm (GO:0005737)|cytoskeleton (GO:0005856)|intracellular anatomical structure (GO:0005622)|intracellular membrane-bounded organelle (GO:0043231)|intracellular non-membrane-bounded organelle (GO:0043232)|intracellular organelle (GO:0043229)|intracellular organelle lumen (GO:0070013)|membrane-bound…		DNA Damage Bypass (WP1803)	-	-	-	-	-	DOWN	P4	-0.0161906	0.756165	-0.553605	0.628166	-0.132752	-0.307137	0.0291313	-0.271547	-0.462254	-0.189849	-0.269888	-0.693899	-0.856273	-0.364362	-0.443783	0.254657	0.0285895	-0.420471	-0.94196	-0.292535	-0.0590761	-0.843913	-0.694574	-0.393313	0.0106577	-0.310271	-0.411543	-0.174379	-0.929118	-0.719089	-0.0384408	0.0353391	-0.616606	-0.321936	0.782592	1.08034
PDE5A	phosphodiesterase 5A	aromatic compound biosynthetic process (GO:0019438)|aromatic compound catabolic process (GO:0019439)|biological regulation (GO:0065007)|biological_process (GO:0008150)|biosynthetic process (GO:0009058)|carbohydrate derivative catabolic process (GO:1901136)|carbohydrate derivative metabolic process (GO:1901135)|catabolic process (GO:0009056)|cell communication (GO:0007154)|cellular aromatic compou…	3',5'-cyclic-GMP phosphodiesterase activity (GO:0047555)|3',5'-cyclic-nucleotide phosphodiesterase activity (GO:0004114)|anion binding (GO:0043168)|binding (GO:0005488)|carbohydrate derivative binding (GO:0097367)|catalytic activity (GO:0003824)|cation binding (GO:0043169)|cGMP binding (GO:0030553)|cyclic-nucleotide phosphodiesterase activity (GO:0004112)|cyclic nucleotide binding (GO:0030551)|gu…	cellular anatomical entity (GO:0110165)|cellular_component (GO:0005575)|cytoplasm (GO:0005737)|cytosol (GO:0005829)|intracellular anatomical structure (GO:0005622)	hsa00230 Purine metabolism|hsa01100 Metabolic pathways|hsa04022 cGMP-PKG signaling pathway	Phosphodiesterases in neuronal function (WP4222)	-	-	-	-	-	DOWN	P4	-0.661946	0.221527	-0.183201	-0.630363	-0.15358	0.0642222	-0.207917	-0.296668	-1.03695	-0.168973	-0.383469	-0.994715	-0.550247	1.02743	-0.45587	-0.0586011	-0.841371	-1.47289	-1.49515	-1.65259	-0.998605	-0.901065	-0.819726	-0.560727	0.889286	0.607296	-0.0678323	-0.621419	-0.58588	-0.054268	0.728466	-0.589736	-0.203886	-1.08653	0.245851	-0.0642758
RRM2	ribonucleotide reductase regulatory subunit M2	aromatic compound biosynthetic process (GO:0019438)|biological regulation (GO:0065007)|biological_process (GO:0008150)|biosynthetic process (GO:0009058)|carbohydrate derivative biosynthetic process (GO:1901137)|carbohydrate derivative metabolic process (GO:1901135)|cell cycle (GO:0007049)|cell cycle G1/S phase transition (GO:0044843)|cell cycle phase transition (GO:0044770)|cell cycle process (GO…	binding (GO:0005488)|catalytic activity (GO:0003824)|cation binding (GO:0043169)|ion binding (GO:0043167)|metal ion binding (GO:0046872)|molecular_function (GO:0003674)|oxidoreductase activity (GO:0016491)|oxidoreductase activity, acting on CH or CH2 groups (GO:0016725)|oxidoreductase activity, acting on CH or CH2 groups, disulfide as acceptor (GO:0016728)|protein binding (GO:0005515)|ribonucleos…	cellular anatomical entity (GO:0110165)|cellular_component (GO:0005575)|cytoplasm (GO:0005737)|cytosol (GO:0005829)|intracellular anatomical structure (GO:0005622)	hsa00230 Purine metabolism|hsa00240 Pyrimidine metabolism|hsa00480 Glutathione metabolism|hsa00983 Drug metabolism - other enzymes|hsa01100 Metabolic pathways|hsa04115 p53 signaling pathway	Biomarkers for pyrimidine metabolism disorders (WP4584)|Fluoropyrimidine activity (WP1601)|Hepatitis C and hepatocellular carcinoma (WP3646)|Interconversion of nucleotide di- and triphosphates (WP4059)|Mitotic G1 phase and G1/S transition (WP1858)|Network map of SARS-CoV-2 signaling pathway (WP5115)|Nucleotide metabolism (WP404)|Orexin receptor pathway (WP5094)|Pyrimidine metabolism (WP4022)|Pyri…	-	-	-	-	-	DOWN	P4	-0.508149	-0.0724106	-1.01149	-0.13098	-0.302361	0.556477	0.0371645	0.648893	0.732738	-0.539251	-1.18592	-0.1242	-0.768679	-0.0237085	-0.922654	0.311379	0.177557	0.592287	-0.567449	-1.42932	-0.0223789	-0.910894	0.190979	0.549437	0.0484936	0.0579188	-0.527198	0.435087	-0.659513	0.491937	-0.310789	0.176118	-1.22532	-1.09137	-0.95499	0.134468
UTP4	UTP4 small subunit processome component	aromatic compound biosynthetic process (GO:0019438)|biological regulation (GO:0065007)|biological_process (GO:0008150)|biosynthetic process (GO:0009058)|cellular aromatic compound metabolic process (GO:0006725)|cellular biosynthetic process (GO:0044249)|cellular component biogenesis (GO:0044085)|cellular component organization or biogenesis (GO:0071840)|cellular macromolecule biosynthetic process…	binding (GO:0005488)|heterocyclic compound binding (GO:1901363)|molecular_function (GO:0003674)|nucleic acid binding (GO:0003676)|organic cyclic compound binding (GO:0097159)|protein binding (GO:0005515)|RNA binding (GO:0003723)	90S preribosome (GO:0030686)|cellular anatomical entity (GO:0110165)|cellular_component (GO:0005575)|chromosome (GO:0005694)|fibrillar center (GO:0001650)|intracellular anatomical structure (GO:0005622)|intracellular membrane-bounded organelle (GO:0043231)|intracellular non-membrane-bounded organelle (GO:0043232)|intracellular organelle (GO:0043229)|intracellular organelle lumen (GO:0070013)|memb…	hsa03008 Ribosome biogenesis in eukaryotes	Major pathway of rRNA processing in the nucleolus and cytosol (WP3797)|rRNA modification in the nucleus and cytosol (WP3828)	-	-	-	-	-	DOWN	P4	-0.0400117	-0.491833	0.0538229	-0.21064	-0.289392	0.0851135	0.119837	-0.184073	-0.0851981	-0.0246434	0.274546	0.11441	0.345403	-0.018578	0.278495	0.158451	-0.487193	-0.203607	0.543033	0.147302	-0.20564	1.49322	-1.42753	-0.602473	0.170839	0.0644015	-0.241023	0.273498	-0.019198	1.09099	-1.70333	-1.01042	-0.209161	0.178446	-0.698252	-0.0383506
BRI3	brain protein I3	biological_process (GO:0008150)|cell activation (GO:0001775)|cell activation involved in immune response (GO:0002263)|cellular localization (GO:0051641)|cellular process (GO:0009987)|establishment of localization (GO:0051234)|establishment of localization in cell (GO:0051649)|exocytosis (GO:0006887)|export from cell (GO:0140352)|granulocyte activation (GO:0036230)|immune effector process (GO:0002…	binding (GO:0005488)|identical protein binding (GO:0042802)|molecular_function (GO:0003674)|protein binding (GO:0005515)	azurophil granule (GO:0042582)|azurophil granule membrane (GO:0035577)|bounding membrane of organelle (GO:0098588)|cell periphery (GO:0071944)|cellular anatomical entity (GO:0110165)|cellular_component (GO:0005575)|cytoplasm (GO:0005737)|cytoplasmic vesicle (GO:0031410)|cytoplasmic vesicle membrane (GO:0030659)|endomembrane system (GO:0012505)|integral component of membrane (GO:0016021)|intracell…		Neutrophil degranulation (WP4049)	UP	-	-	-	-	-	P5	0.170577	0.51235	-0.0488053	0.366623	1.00034	0.317555	0.176116	1.49057	1.21183	0.130676	0.149608	1.03824	0.528387	-0.440654	0.493795	1.40755	-0.0300306	-0.350724	0.671674	0.254076	0.977456	0.0643213	0.253662	0.0572938	0.758539	-0.428157	0.50851	0.166211	0.433437	-1.14349	-0.265117	0.620612	0.381763	-0.145898	0.674587	-0.0509872
CD68	CD68 molecule	aging (GO:0007568)|antigen processing and presentation (GO:0019882)|autocrine signaling (GO:0035425)|biological process involved in interspecies interaction between organisms (GO:0044419)|biological regulation (GO:0065007)|biological_process (GO:0008150)|cell-cell signaling (GO:0007267)|cell activation (GO:0001775)|cell activation involved in immune response (GO:0002263)|cell communication (GO:00…	binding (GO:0005488)|molecular_function (GO:0003674)|protein binding (GO:0005515)	azurophil granule (GO:0042582)|azurophil granule membrane (GO:0035577)|bounding membrane of organelle (GO:0098588)|cell periphery (GO:0071944)|cellular anatomical entity (GO:0110165)|cellular_component (GO:0005575)|cytoplasm (GO:0005737)|cytoplasmic vesicle (GO:0031410)|cytoplasmic vesicle membrane (GO:0030659)|endomembrane system (GO:0012505)|endosome (GO:0005768)|endosome membrane (GO:0010008)|…	hsa04142 Lysosome	Macrophage markers (WP4146)|Neutrophil degranulation (WP4049)	UP	-	-	-	-	-	P5	0.672156	-0.0771148	0.434925	0.745334	0.311659	0.78287	0.82973	0.0566361	0.0825691	0.31225	0.223625	0.0264892	-0.0209994	0.0865798	-0.213066	0.12799	0.187395	0.461766	1.72902	0.268767	-0.456891	0.439801	1.11079	0.356634	0.565022	1.25246	0.488938	0.824469	0.0937792	0.111192	-0.504659	0.071722	-0.0110107	-0.200069	0.140328	0.391044
CHPT1	choline phosphotransferase 1	biological regulation (GO:0065007)|biological_process (GO:0008150)|biosynthetic process (GO:0009058)|CDP-choline pathway (GO:0006657)|cell growth (GO:0016049)|cellular biosynthetic process (GO:0044249)|cellular component organization (GO:0016043)|cellular component organization or biogenesis (GO:0071840)|cellular lipid biosynthetic process (GO:0097384)|cellular lipid metabolic process (GO:0044255…	binding (GO:0005488)|catalytic activity (GO:0003824)|cation binding (GO:0043169)|CDP-alcohol phosphatidyltransferase activity (GO:0017169)|diacylglycerol binding (GO:0019992)|diacylglycerol cholinephosphotransferase activity (GO:0004142)|ion binding (GO:0043167)|lipid binding (GO:0008289)|metal ion binding (GO:0046872)|molecular_function (GO:0003674)|phosphotransferase activity, for other substit…	bounding membrane of organelle (GO:0098588)|cellular anatomical entity (GO:0110165)|cellular_component (GO:0005575)|cytoplasm (GO:0005737)|endomembrane system (GO:0012505)|endoplasmic reticulum (GO:0005783)|endoplasmic reticulum membrane (GO:0005789)|endoplasmic reticulum subcompartment (GO:0098827)|Golgi apparatus (GO:0005794)|Golgi apparatus subcompartment (GO:0098791)|Golgi membrane (GO:000013…	hsa00440 Phosphonate and phosphinate metabolism|hsa00564 Glycerophospholipid metabolism|hsa00565 Ether lipid metabolism|hsa01100 Metabolic pathways|hsa05231 Choline metabolism in cancer	Glycerolipids and glycerophospholipids (WP4722)|Glycerophospholipid biosynthesis (WP2740)|Glycerophospholipid biosynthetic pathway (WP2533)|Kennedy pathway from sphingolipids (WP3933)|MTHFR deficiency (WP4288)|One-carbon metabolism and related pathways (WP3940)	UP	-	-	-	-	-	P5	0.227538	0.464032	0.510407	0.091657	0.705754	0.211796	1.05865	0.257891	0.242309	0.49385	0.398241	0.179628	-0.217934	0.394583	0.0873363	0.359887	0.611257	-0.21547	-0.691729	-0.886006	-0.0286108	-0.303857	0.520802	0.0809345	1.01095	0.0127797	0.530917	0.00421763	0.944065	0.474179	0.742135	-0.06329	0.516199	0.0987327	0.474222	0.592797
DDIT3	DNA damage inducible transcript 3	adaptive thermogenesis (GO:1990845)|anatomical structure development (GO:0048856)|anatomical structure maturation (GO:0071695)|anterior/posterior axis specification (GO:0009948)|anterior/posterior pattern specification (GO:0009952)|apoptotic process (GO:0006915)|apoptotic signaling pathway (GO:0097190)|aromatic compound biosynthetic process (GO:0019438)|ATF6-mediated unfolded protein response (GO…	binding (GO:0005488)|cAMP response element binding protein binding (GO:0008140)|cis-regulatory region sequence-specific DNA binding (GO:0000987)|DNA-binding transcription activator activity (GO:0001216)|DNA-binding transcription activator activity, RNA polymerase II-specific (GO:0001228)|DNA-binding transcription factor activity (GO:0003700)|DNA-binding transcription factor activity, RNA polymera…	cellular anatomical entity (GO:0110165)|cellular_component (GO:0005575)|CHOP-ATF3 complex (GO:1990622)|CHOP-ATF4 complex (GO:1990617)|CHOP-C/EBP complex (GO:0036488)|chromatin (GO:0000785)|chromosome (GO:0005694)|cytoplasm (GO:0005737)|cytoplasmic vesicle (GO:0031410)|cytosol (GO:0005829)|endomembrane system (GO:0012505)|endosome (GO:0005768)|intracellular anatomical structure (GO:0005622)|intrac…	hsa04010 MAPK signaling pathway|hsa04141 Protein processing in endoplasmic reticulum|hsa04210 Apoptosis|hsa04932 Non-alcoholic fatty liver disease|hsa05010 Alzheimer disease|hsa05012 Parkinson disease|hsa05014 Amyotrophic lateral sclerosis|hsa05020 Prion disease|hsa05022 Pathways of neurodegeneration - multiple diseases|hsa05202 Transcriptional misregulation in cancer	Adipogenesis (WP236)|Alzheimer's disease (WP5124)|Alzheimer's disease and miRNA effects (WP2059)|ATF4 activates genes in response to endoplasmic reticulum stress (WP2753)|ATF6 (ATF6-alpha) activates chaperone genes (WP2655)|Endoplasmic reticulum stress response in coronavirus infection (WP4861)|FOXO-mediated transcription of cell death genes (WP4984)|Host-pathogen interaction of human coronavirus…	UP	-	UP	-	UP	UP	P5	0.781672	0.927743	0.612485	-0.07699	0.567559	1.18523	0.50529	0.697197	1.73175	0.0369365	0.610842	0.339916	0.632847	0.607134	0.37952	0.990309	0.725712	0.364368	0.99767	0.978712	1.40521	1.03444	1.45059	0.232985	0.693058	0.421345	1.68613	1.63114	1.69807	0.328134	1.31048	0.689111	1.67805	0.280728	0.682234	-0.432088
DHRS3	dehydrogenase/reductase 3	alcohol metabolic process (GO:0006066)|anatomical structure development (GO:0048856)|anatomical structure morphogenesis (GO:0009653)|animal organ development (GO:0048513)|animal organ morphogenesis (GO:0009887)|biological regulation (GO:0065007)|biological_process (GO:0008150)|bone development (GO:0060348)|bone morphogenesis (GO:0060349)|cardiac chamber development (GO:0003205)|cardiac chamber mo…	alcohol dehydrogenase (NADP+) activity (GO:0008106)|aldo-keto reductase (NADP) activity (GO:0004033)|binding (GO:0005488)|catalytic activity (GO:0003824)|electron transfer activity (GO:0009055)|heterocyclic compound binding (GO:1901363)|molecular_function (GO:0003674)|NADP-retinol dehydrogenase activity (GO:0052650)|nucleoside phosphate binding (GO:1901265)|nucleotide binding (GO:0000166)|organic…	9+0 non-motile cilium (GO:0097731)|bounding membrane of organelle (GO:0098588)|cell periphery (GO:0071944)|cell projection (GO:0042995)|cell projection membrane (GO:0031253)|cellular anatomical entity (GO:0110165)|cellular_component (GO:0005575)|ciliary membrane (GO:0060170)|cilium (GO:0005929)|cytoplasm (GO:0005737)|endomembrane system (GO:0012505)|endoplasmic reticulum (GO:0005783)|endoplasmic …	hsa00830 Retinol metabolism|hsa01100 Metabolic pathways|hsa01240 Biosynthesis of cofactors	Signaling by Retinoic Acid (WP4421)|Visual phototransduction (WP2776)|Vitamin A and carotenoid metabolism (WP716)	UP	-	-	-	-	-	P5	0.942578	0.382927	1.11528	1.47055	0.674012	1.14584	0.251754	0.222211	0.454579	0.47873	0.318829	0.0343711	-0.516417	-0.386509	0.63063	0.331313	0.156048	-0.964999	1.04198	0.341794	1.09957	0.530233	0.790781	1.83837	-0.212788	0.19008	0.323968	0.801654	0.346699	0.586457	0.793004	0.147536	1.13976	-0.058814	0.885131	1.85388
EGR1	early growth response 1	anatomical structure development (GO:0048856)|animal organ development (GO:0048513)|apoptotic process (GO:0006915)|aromatic compound biosynthetic process (GO:0019438)|behavior (GO:0007610)|biological process involved in interspecies interaction between organisms (GO:0044419)|biological regulation (GO:0065007)|biological_process (GO:0008150)|biosynthetic process (GO:0009058)|blood vessel developme…	binding (GO:0005488)|cation binding (GO:0043169)|chromatin binding (GO:0003682)|cis-regulatory region sequence-specific DNA binding (GO:0000987)|DNA-binding transcription activator activity (GO:0001216)|DNA-binding transcription activator activity, RNA polymerase II-specific (GO:0001228)|DNA-binding transcription factor activity (GO:0003700)|DNA-binding transcription factor activity, RNA polymera…	cellular anatomical entity (GO:0110165)|cellular_component (GO:0005575)|chromatin (GO:0000785)|chromosome (GO:0005694)|cytoplasm (GO:0005737)|intracellular anatomical structure (GO:0005622)|intracellular membrane-bounded organelle (GO:0043231)|intracellular non-membrane-bounded organelle (GO:0043232)|intracellular organelle (GO:0043229)|intracellular organelle lumen (GO:0070013)|membrane-bounded …	hsa04371 Apelin signaling pathway|hsa04912 GnRH signaling pathway|hsa04928 Parathyroid hormone synthesis, secretion and action|hsa04933 AGE-RAGE signaling pathway in diabetic complications|hsa05020 Prion disease|hsa05166 Human T-cell leukemia virus 1 infection	Brain-derived neurotrophic factor (BDNF) signaling pathway (WP2380)|Circadian rhythm genes (WP3594)|Endothelin pathway (WP4857)|Gastrin signaling pathway (WP4659)|Insulin signaling (WP481)|Interferon alpha/beta signaling (WP1835)|let-7 inhibition of ES cell reprogramming (WP3299)|Network map of SARS-CoV-2 signaling pathway (WP5115)|NGF-stimulated transcription (WP4982)|NRF2 pathway (WP2884)|Nucle…	UP	-	-	-	-	-	P5	1.02491	0.461709	0.708405	-0.485066	-0.269375	2.08572	0.667348	1.60942	1.76094	1.32758	0.936899	0.865493	0.90972	-0.00554033	0.977407	1.18601	0.529454	-0.149165	0.199551	0.235557	2.42292	-0.417203	1.24658	-0.248283	0.274867	-0.568717	2.40703	1.56981	2.31393	0.352145	0.925047	-0.0698874	1.278	1.15319	0.260482	0.875324
ESRP1	epithelial splicing regulatory protein 1	anatomical structure development (GO:0048856)|animal organ development (GO:0048513)|auditory receptor cell fate commitment (GO:0009912)|auditory receptor cell fate specification (GO:0042667)|biological regulation (GO:0065007)|biological_process (GO:0008150)|cell communication (GO:0007154)|cell differentiation (GO:0030154)|cell fate commitment (GO:0045165)|cell fate specification (GO:0001708)|cell…	binding (GO:0005488)|heterocyclic compound binding (GO:1901363)|molecular_function (GO:0003674)|mRNA binding (GO:0003729)|nucleic acid binding (GO:0003676)|organic cyclic compound binding (GO:0097159)|protein binding (GO:0005515)|RNA binding (GO:0003723)	cellular anatomical entity (GO:0110165)|cellular_component (GO:0005575)|intracellular anatomical structure (GO:0005622)|intracellular membrane-bounded organelle (GO:0043231)|intracellular organelle (GO:0043229)|intracellular organelle lumen (GO:0070013)|membrane-bounded organelle (GO:0043227)|membrane-enclosed lumen (GO:0031974)|nuclear body (GO:0016604)|nuclear lumen (GO:0031981)|nucleoplasm (GO…		Signaling by FGFR2 (WP3338)	UP	-	-	-	-	-	P5	0.178337	-0.0495514	0.424705	0.501016	0.360476	0.496382	0.105707	-0.0175585	0.452337	0.145886	-0.174021	0.107112	0.636735	-0.252398	-0.501202	-0.858768	-0.271072	0.260079	-0.385123	0.213337	0.19548	0.121704	0.146879	0.138031	0.677373	0.916411	0.295483	0.1557	0.497356	0.758336	0.143	0.49839	0.294109	-0.4349	0.104307	0.0893345
FNIP1	folliculin interacting protein 1	anatomical structure development (GO:0048856)|animal organ development (GO:0048513)|apoptotic process (GO:0006915)|aromatic compound biosynthetic process (GO:0019438)|B cell activation (GO:0042113)|B cell apoptotic process (GO:0001783)|B cell differentiation (GO:0030183)|biological regulation (GO:0065007)|biological_process (GO:0008150)|biosynthetic process (GO:0009058)|cell activation (GO:000177…	ATPase inhibitor activity (GO:0042030)|ATPase regulator activity (GO:0060590)|binding (GO:0005488)|chaperone binding (GO:0051087)|enzyme binding (GO:0019899)|enzyme inhibitor activity (GO:0004857)|enzyme regulator activity (GO:0030234)|GTPase regulator activity (GO:0030695)|guanyl-nucleotide exchange factor activity (GO:0005085)|molecular function regulator (GO:0098772)|molecular_function (GO:000…	bounding membrane of organelle (GO:0098588)|cellular anatomical entity (GO:0110165)|cellular_component (GO:0005575)|cytoplasm (GO:0005737)|cytosol (GO:0005829)|intracellular anatomical structure (GO:0005622)|intracellular membrane-bounded organelle (GO:0043231)|intracellular organelle (GO:0043229)|lysosomal membrane (GO:0005765)|lysosome (GO:0005764)|lytic vacuole (GO:0000323)|lytic vacuole membr…	hsa04150 mTOR signaling pathway	Amino acids regulate mTORC1 (WP5015)	UP	-	-	-	-	-	P5	0.726895	0.518794	-0.246166	0.136659	0.209055	0.862812	0.58532	1.17508	0.481456	0.864806	0.272664	0.17801	0.849536	0.212955	0.198558	0.368221	0.237712	0.0504888	0.954089	-0.787856	1.16961	0.778072	0.750245	0.313867	-0.655877	-0.708842	0.789884	0.286292	2.4732	1.02839	0.472347	-0.205748	1.30318	0.668109	1.18967	0.921514
FTH1	ferritin heavy chain 1	biological regulation (GO:0065007)|biological_process (GO:0008150)|cation homeostasis (GO:0055080)|cation transport (GO:0006812)|cell activation (GO:0001775)|cell activation involved in immune response (GO:0002263)|cell population proliferation (GO:0008283)|cellular cation homeostasis (GO:0030003)|cellular chemical homeostasis (GO:0055082)|cellular homeostasis (GO:0019725)|cellular ion homeostasi…	binding (GO:0005488)|catalytic activity (GO:0003824)|cation binding (GO:0043169)|ferric iron binding (GO:0008199)|ferrous iron binding (GO:0008198)|ferroxidase activity (GO:0004322)|ion binding (GO:0043167)|iron ion binding (GO:0005506)|metal ion binding (GO:0046872)|molecular_function (GO:0003674)|oxidoreductase activity (GO:0016491)|oxidoreductase activity, acting on metal ions (GO:0016722)|oxi…	autolysosome (GO:0044754)|autophagosome (GO:0005776)|cellular anatomical entity (GO:0110165)|cellular_component (GO:0005575)|cytoplasm (GO:0005737)|cytoplasmic vesicle (GO:0031410)|cytosol (GO:0005829)|endomembrane system (GO:0012505)|extracellular exosome (GO:0070062)|extracellular organelle (GO:0043230)|extracellular region (GO:0005576)|extracellular space (GO:0005615)|extracellular vesicle (GO…	hsa04216 Ferroptosis|hsa04217 Necroptosis|hsa04978 Mineral absorption	Binding and uptake of ligands by scavenger receptors (WP2784)|Ferroptosis (WP4313)|Iron metabolism disorders (WP5172)|Iron metabolism in placenta (WP2007)|Iron uptake and transport (WP2670)|Neutrophil degranulation (WP4049)|NRF2 pathway (WP2884)|Nuclear receptors meta-pathway (WP2882)|trans-Golgi Network Vesicle Budding (WP3578)	UP	-	-	-	-	-	P5	0.606043	0.855431	0.557049	0.27244	-0.00317672	0.642311	0.445228	0.453875	0.681885	-0.247842	0.460794	0.577609	-0.311514	0.289355	0.33548	0.604274	0.185364	-0.236562	1.09626	0.144679	1.19544	0.739483	0.340137	0.326816	0.218273	0.240814	0.503334	0.12709	0.793687	-0.626769	1.00728	1.0113	1.05053	0.246558	0.162181	1.01593
FTL	ferritin light chain	biological regulation (GO:0065007)|biological_process (GO:0008150)|cation homeostasis (GO:0055080)|cation transport (GO:0006812)|cell activation (GO:0001775)|cell activation involved in immune response (GO:0002263)|cellular cation homeostasis (GO:0030003)|cellular chemical homeostasis (GO:0055082)|cellular homeostasis (GO:0019725)|cellular ion homeostasis (GO:0006873)|cellular iron ion homeostasi…	binding (GO:0005488)|cation binding (GO:0043169)|ferric iron binding (GO:0008199)|ferrous iron binding (GO:0008198)|identical protein binding (GO:0042802)|ion binding (GO:0043167)|iron ion binding (GO:0005506)|metal ion binding (GO:0046872)|molecular_function (GO:0003674)|protein binding (GO:0005515)|transition metal ion binding (GO:0046914)	autolysosome (GO:0044754)|autophagosome (GO:0005776)|azurophil granule (GO:0042582)|azurophil granule lumen (GO:0035578)|cellular anatomical entity (GO:0110165)|cellular_component (GO:0005575)|cytoplasm (GO:0005737)|cytoplasmic vesicle (GO:0031410)|cytoplasmic vesicle lumen (GO:0060205)|cytosol (GO:0005829)|endomembrane system (GO:0012505)|extracellular exosome (GO:0070062)|extracellular organell…	hsa04216 Ferroptosis|hsa04217 Necroptosis|hsa04978 Mineral absorption	Binding and uptake of ligands by scavenger receptors (WP2784)|Ferroptosis (WP4313)|Iron metabolism disorders (WP5172)|Iron uptake and transport (WP2670)|Nanoparticle triggered regulated necrosis (WP2513)|Neurodegeneration with brain iron accumulation (NBIA) subtypes pathway (WP4577)|Neutrophil degranulation (WP4049)|NRF2 pathway (WP2884)|Nuclear receptors meta-pathway (WP2882)|trans-Golgi Network…	UP	-	UP	UP	UP	UP	P5	0.825927	0.527148	0.491431	0.444583	0.465918	0.769791	0.505723	0.523084	0.942137	0.430574	0.751516	0.277764	0.314258	0.236886	0.234425	0.658043	0.432489	0.50972	0.883334	0.761169	0.666427	0.7881	0.639499	0.476477	0.650128	0.352312	0.887621	0.848636	0.826465	-0.107714	0.945499	0.502683	0.75807	0.335369	0.41289	0.55812
GPNMB	glycoprotein nmb	anatomical structure development (GO:0048856)|anatomical structure formation involved in morphogenesis (GO:0048646)|anatomical structure morphogenesis (GO:0009653)|angiogenesis (GO:0001525)|biological adhesion (GO:0022610)|biological regulation (GO:0065007)|biological_process (GO:0008150)|blood vessel development (GO:0001568)|blood vessel morphogenesis (GO:0048514)|cell-cell adhesion (GO:0098609)…	binding (GO:0005488)|carbohydrate derivative binding (GO:0097367)|cell adhesion molecule binding (GO:0050839)|chemoattractant activity (GO:0042056)|glycosaminoglycan binding (GO:0005539)|heparin binding (GO:0008201)|integrin binding (GO:0005178)|molecular function regulator (GO:0098772)|molecular_function (GO:0003674)|protein-containing complex binding (GO:0044877)|protein binding (GO:0005515)|pr…	bounding membrane of organelle (GO:0098588)|cell periphery (GO:0071944)|cellular anatomical entity (GO:0110165)|cellular_component (GO:0005575)|chitosome (GO:0045009)|cytoplasm (GO:0005737)|cytoplasmic vesicle (GO:0031410)|cytoplasmic vesicle membrane (GO:0030659)|early endosome (GO:0005769)|early endosome membrane (GO:0031901)|endomembrane system (GO:0012505)|endosome (GO:0005768)|endosome membr…		Signaling by PTK6 (WP4437)	UP	-	UP	-	UP	UP	P5	1.2495	0.186385	0.393326	0.392424	-0.143039	2.12981	0.590827	0.932825	1.24147	0.511572	0.912858	0.166855	0.547008	0.484785	0.377559	0.686091	0.812971	0.698691	0.577171	0.707076	1.16853	1.24883	0.861353	1.36119	0.886302	0.693588	1.24826	1.39489	1.56556	-0.0457437	0.24468	0.789811	1.13526	1.02422	0.830078	-0.412589
IFI30	IFI30 lysosomal thiol reductase	antigen processing and presentation (GO:0019882)|antigen processing and presentation of exogenous antigen (GO:0019884)|antigen processing and presentation of exogenous peptide antigen (GO:0002478)|antigen processing and presentation of exogenous peptide antigen via MHC class I (GO:0042590)|antigen processing and presentation of exogenous peptide antigen via MHC class II (GO:0019886)|antigen proce…	binding (GO:0005488)|catalytic activity (GO:0003824)|molecular_function (GO:0003674)|oxidoreductase activity (GO:0016491)|oxidoreductase activity, acting on a sulfur group of donors (GO:0016667)|protein binding (GO:0005515)	cell junction (GO:0030054)|cellular anatomical entity (GO:0110165)|cellular_component (GO:0005575)|cytoplasm (GO:0005737)|cytosol (GO:0005829)|extracellular region (GO:0005576)|intracellular anatomical structure (GO:0005622)|intracellular membrane-bounded organelle (GO:0043231)|intracellular organelle (GO:0043229)|intracellular organelle lumen (GO:0070013)|lysosomal lumen (GO:0043202)|lysosome (G…	hsa04612 Antigen processing and presentation	Interferon gamma signaling (WP1836)|MHC class II antigen presentation (WP2679)	UP	-	-	-	UP	-	P5	1.04252	0.700659	0.257802	0.72397	0.589	0.434237	0.562993	0.651267	0.365097	0.912808	0.171771	0.379481	-0.270417	0.458002	0.298493	0.3068	0.487685	1.25258	1.20123	0.973834	0.674864	0.974822	0.906735	0.270608	1.07609	0.196982	0.935937	1.18426	0.359784	-0.151468	0.107725	0.698225	0.235202	-0.806837	0.283285	0.267368
ITLN1	intelectin 1	anion transmembrane transport (GO:0098656)|anion transport (GO:0006820)|antimicrobial humoral response (GO:0019730)|biological process involved in interspecies interaction between organisms (GO:0044419)|biological regulation (GO:0065007)|biological_process (GO:0008150)|carbohydrate transmembrane transport (GO:0034219)|carbohydrate transport (GO:0008643)|cellular component assembly (GO:0022607)|ce…	binding (GO:0005488)|calcium ion binding (GO:0005509)|carbohydrate binding (GO:0030246)|cation binding (GO:0043169)|identical protein binding (GO:0042802)|ion binding (GO:0043167)|metal ion binding (GO:0046872)|molecular_function (GO:0003674)|oligosaccharide binding (GO:0070492)|protein binding (GO:0005515)	anchored component of membrane (GO:0031225)|brush border (GO:0005903)|brush border membrane (GO:0031526)|cell periphery (GO:0071944)|cell projection (GO:0042995)|cell projection membrane (GO:0031253)|cellular anatomical entity (GO:0110165)|cellular_component (GO:0005575)|cluster of actin-based cell projections (GO:0098862)|extracellular exosome (GO:0070062)|extracellular organelle (GO:0043230)|ex…		Antimicrobial peptides (WP4101)	UP	-	-	-	-	-	P5	1.18157	1.04864	1.2362	0.489558	0.922852	-0.184188	0.853452	0.115842	0.536225	0.190349	-0.418434	0.814941	1.57414	0.515701	0.695157	-0.648155	-0.600854	0.867348	-0.268725	-0.769712	0.649222	1.11377	-1.18764	-0.0527019	1.03087	-0.199256	1.58254	1.19948	2.05484	-0.0612172	1.24224	0.731438	1.03742	0.614949	2.06867	-0.600787
KCNQ1OT1	KCNQ1 opposite strand/antisense transcript 1	aromatic compound biosynthetic process (GO:0019438)|biological regulation (GO:0065007)|biological_process (GO:0008150)|biosynthetic process (GO:0009058)|cellular aromatic compound metabolic process (GO:0006725)|cellular biosynthetic process (GO:0044249)|cellular component organization (GO:0016043)|cellular component organization or biogenesis (GO:0071840)|cellular macromolecule biosynthetic proce…		cellular anatomical entity (GO:0110165)|cellular_component (GO:0005575)|intracellular anatomical structure (GO:0005622)|intracellular membrane-bounded organelle (GO:0043231)|intracellular non-membrane-bounded organelle (GO:0043232)|intracellular organelle (GO:0043229)|intracellular organelle lumen (GO:0070013)|membrane-bounded organelle (GO:0043227)|membrane-enclosed lumen (GO:0031974)|non-membra…			UP	-	-	-	-	-	P5	0.098814	0.926795	0.126267	0.360485	-0.0412209	0.670104	0.44504	0.330598	0.400866	1.61865	-0.427872	0.176802	0.562145	-1.19581	0.419567	1.00485	1.12974	0.536513	0.179949	0.544077	0.241252	0.205134	0.957081	0.178607	0.884927	0.0334179	-0.846823	-0.380277	-0.105431	0.0583103	-0.624228	0.330839	0.262114	0.16673	0.474228	0.194938
MT1E	metallothionein 1E	biological regulation (GO:0065007)|biological_process (GO:0008150)|cation homeostasis (GO:0055080)|cellular cation homeostasis (GO:0030003)|cellular chemical homeostasis (GO:0055082)|cellular divalent inorganic cation homeostasis (GO:0072503)|cellular homeostasis (GO:0019725)|cellular ion homeostasis (GO:0006873)|cellular metal ion homeostasis (GO:0006875)|cellular process (GO:0009987)|cellular r…	binding (GO:0005488)|cation binding (GO:0043169)|ion binding (GO:0043167)|metal ion binding (GO:0046872)|molecular_function (GO:0003674)|protein binding (GO:0005515)|transition metal ion binding (GO:0046914)|zinc ion binding (GO:0008270)	cellular anatomical entity (GO:0110165)|cellular_component (GO:0005575)|cytoplasm (GO:0005737)|intracellular anatomical structure (GO:0005622)|intracellular membrane-bounded organelle (GO:0043231)|intracellular organelle (GO:0043229)|membrane-bounded organelle (GO:0043227)|nucleus (GO:0005634)|organelle (GO:0043226)	hsa04978 Mineral absorption	Copper homeostasis (WP3286)|Metallothioneins bind metals (WP3814)|Zinc homeostasis (WP3529)	UP	-	-	-	UP	-	P5	1.61285	1.86509	2.1752	1.01964	0.492028	1.79039	2.43716	1.64408	2.81809	0.623119	0.935279	-0.936224	-0.132826	0.450183	0.117482	0.152908	1.09555	-0.601785	-0.879314	0.472319	2.475	1.68923	0.4904	0.371832	2.15103	0.587364	2.23055	3.22768	2.83781	0.000252039	1.74449	1.01406	1.60032	1.5046	1.27874	1.39878
MT1F	metallothionein 1F	biological regulation (GO:0065007)|biological_process (GO:0008150)|cation homeostasis (GO:0055080)|cellular cation homeostasis (GO:0030003)|cellular chemical homeostasis (GO:0055082)|cellular divalent inorganic cation homeostasis (GO:0072503)|cellular homeostasis (GO:0019725)|cellular ion homeostasis (GO:0006873)|cellular metal ion homeostasis (GO:0006875)|cellular process (GO:0009987)|cellular r…	binding (GO:0005488)|cation binding (GO:0043169)|ion binding (GO:0043167)|metal ion binding (GO:0046872)|molecular_function (GO:0003674)|protein binding (GO:0005515)|transition metal ion binding (GO:0046914)|zinc ion binding (GO:0008270)	cellular anatomical entity (GO:0110165)|cellular_component (GO:0005575)|cytoplasm (GO:0005737)|intracellular anatomical structure (GO:0005622)|intracellular membrane-bounded organelle (GO:0043231)|intracellular organelle (GO:0043229)|membrane-bounded organelle (GO:0043227)|nucleus (GO:0005634)|organelle (GO:0043226)	hsa04978 Mineral absorption	Copper homeostasis (WP3286)|Metallothioneins bind metals (WP3814)|Zinc homeostasis (WP3529)	UP	-	-	-	UP	-	P5	0.925211	1.65491	2.34073	1.4799	-0.00109693	1.14387	1.02197	1.47533	2.24022	1.26051	0.589223	-0.168395	0.708153	0.046904	-0.298992	0.0840548	-0.286988	0.807979	0.35644	0.274257	2.02019	2.06257	1.46679	1.67739	1.55835	1.47638	1.49495	2.60663	2.11832	-0.133474	1.80386	0.802053	2.09645	0.511967	0.808915	0.255252
MT1G	metallothionein 1G	anatomical structure development (GO:0048856)|animal organ development (GO:0048513)|biological regulation (GO:0065007)|biological_process (GO:0008150)|cation homeostasis (GO:0055080)|cell activation (GO:0001775)|cell differentiation (GO:0030154)|cellular cation homeostasis (GO:0030003)|cellular chemical homeostasis (GO:0055082)|cellular developmental process (GO:0048869)|cellular divalent inorgan…	binding (GO:0005488)|cation binding (GO:0043169)|ion binding (GO:0043167)|metal ion binding (GO:0046872)|molecular_function (GO:0003674)|protein binding (GO:0005515)|transition metal ion binding (GO:0046914)|zinc ion binding (GO:0008270)	cellular anatomical entity (GO:0110165)|cellular_component (GO:0005575)|cytoplasm (GO:0005737)|intracellular anatomical structure (GO:0005622)|intracellular membrane-bounded organelle (GO:0043231)|intracellular organelle (GO:0043229)|membrane-bounded organelle (GO:0043227)|nucleus (GO:0005634)|organelle (GO:0043226)	hsa04978 Mineral absorption	Copper homeostasis (WP3286)|Metallothioneins bind metals (WP3814)|Zinc homeostasis (WP3529)	UP	-	-	-	UP	-	P5	1.07989	1.38931	1.80019	1.25197	1.67673	0.955155	2.12112	0.79613	1.90219	0.178337	1.21066	-1.05301	0.483784	0.545611	0.137168	-0.203193	0.970764	0.120165	0.486582	0.156838	1.38485	1.3051	0.8165	1.04546	2.62089	1.1459	1.43289	2.95677	1.80488	-0.334293	2.18516	0.895025	1.30896	1.23508	2.13496	0.737807
MT1X	metallothionein 1X	biological regulation (GO:0065007)|biological_process (GO:0008150)|cation homeostasis (GO:0055080)|cellular cation homeostasis (GO:0030003)|cellular chemical homeostasis (GO:0055082)|cellular divalent inorganic cation homeostasis (GO:0072503)|cellular homeostasis (GO:0019725)|cellular ion homeostasis (GO:0006873)|cellular metal ion homeostasis (GO:0006875)|cellular process (GO:0009987)|cellular r…	binding (GO:0005488)|cation binding (GO:0043169)|ion binding (GO:0043167)|metal ion binding (GO:0046872)|molecular_function (GO:0003674)|protein binding (GO:0005515)|transition metal ion binding (GO:0046914)|zinc ion binding (GO:0008270)	cellular anatomical entity (GO:0110165)|cellular_component (GO:0005575)|cytoplasm (GO:0005737)|intracellular anatomical structure (GO:0005622)|intracellular membrane-bounded organelle (GO:0043231)|intracellular organelle (GO:0043229)|membrane-bounded organelle (GO:0043227)|nucleus (GO:0005634)|organelle (GO:0043226)	hsa04978 Mineral absorption	Copper homeostasis (WP3286)|Metallothioneins bind metals (WP3814)|Oxidative stress response (WP408)|Zinc homeostasis (WP3529)	UP	UP	-	-	UP	-	P5	1.26743	1.07868	1.74426	0.820178	1.12437	1.01367	1.81214	1.79018	2.0909	0.841768	1.03459	0.163933	-0.116175	-0.374945	-0.356202	0.209271	-0.0289607	0.314615	0.155459	1.15436	1.82612	1.71287	1.14458	0.861797	1.19739	0.566454	1.46337	2.53432	1.91185	0.372948	1.70087	1.53709	2.08388	2.26714	1.37722	1.28634
NFIA	nuclear factor I A	anatomical structure development (GO:0048856)|animal organ development (GO:0048513)|aromatic compound biosynthetic process (GO:0019438)|biological process involved in interspecies interaction between organisms (GO:0044419)|biological process involved in symbiotic interaction (GO:0044403)|biological regulation (GO:0065007)|biological_process (GO:0008150)|biosynthetic process (GO:0009058)|cell junc…	binding (GO:0005488)|chromatin binding (GO:0003682)|cis-regulatory region sequence-specific DNA binding (GO:0000987)|DNA-binding transcription activator activity (GO:0001216)|DNA-binding transcription activator activity, RNA polymerase II-specific (GO:0001228)|DNA-binding transcription factor activity (GO:0003700)|DNA-binding transcription factor activity, RNA polymerase II-specific (GO:0000981)|…	cell junction (GO:0030054)|cellular anatomical entity (GO:0110165)|cellular_component (GO:0005575)|chromatin (GO:0000785)|chromosome (GO:0005694)|intracellular anatomical structure (GO:0005622)|intracellular membrane-bounded organelle (GO:0043231)|intracellular non-membrane-bounded organelle (GO:0043232)|intracellular organelle (GO:0043229)|intracellular organelle lumen (GO:0070013)|membrane-boun…		miR-targeted genes in lymphocytes (WP2004)|miR-targeted genes in muscle cell (WP2005)|RNA Polymerase III Transcription (WP4135)	UP	-	-	-	-	-	P5	0.222263	0.261839	0.183097	0.195225	0.813243	-0.0179547	0.674268	0.511951	0.12894	0.428519	0.0937873	0.151166	-0.144188	-0.480534	0.224139	0.649252	-0.423856	-0.0976043	0.0261782	-0.349933	0.78874	0.33127	0.367355	0.590941	-0.524246	0.0202431	0.812508	0.243924	0.602359	-0.253104	0.120653	0.0727849	-0.0287298	0.0554967	0.00409932	0.575354
PLIN2	perilipin 2	anion transport (GO:0006820)|biological regulation (GO:0065007)|biological_process (GO:0008150)|establishment of localization (GO:0051234)|fatty acid transport (GO:0015908)|ion transport (GO:0006811)|lipid localization (GO:0010876)|lipid metabolic process (GO:0006629)|lipid storage (GO:0019915)|lipid transport (GO:0006869)|localization (GO:0051179)|long-chain fatty acid transport (GO:0015909)|mac…	binding (GO:0005488)|molecular_function (GO:0003674)|protein binding (GO:0005515)	cell periphery (GO:0071944)|cellular anatomical entity (GO:0110165)|cellular_component (GO:0005575)|cytoplasm (GO:0005737)|cytosol (GO:0005829)|endomembrane system (GO:0012505)|endoplasmic reticulum (GO:0005783)|extracellular region (GO:0005576)|intracellular anatomical structure (GO:0005622)|intracellular membrane-bounded organelle (GO:0043231)|intracellular non-membrane-bounded organelle (GO:00…	hsa03320 PPAR signaling pathway	Adipogenesis (WP236)|Lipophagy (WP4985)|PPAR-gamma pathway (WP5071)|PPAR Beta/Delta pathway (WP5073)|Regulation of lipid metabolism by PPARalpha (WP2797)	UP	-	UP	-	UP	UP	P5	0.321702	0.115985	0.61928	0.447756	0.222512	0.682407	0.48698	-0.216656	1.06009	0.264782	1.02532	0.0907609	0.274004	-0.129133	0.439255	1.04702	0.578907	0.876335	1.21704	0.910902	0.569217	1.38547	0.847687	0.498996	0.33622	0.234784	0.861627	1.23568	1.0461	0.312844	0.89665	-0.146311	0.9219	-0.0778365	0.389753	-0.121884
SLC30A1	solute carrier family 30 member 1	anatomical structure development (GO:0048856)|anterograde trans-synaptic signaling (GO:0098916)|biological regulation (GO:0065007)|biological_process (GO:0008150)|cadmium ion transmembrane transport (GO:0070574)|cadmium ion transport (GO:0015691)|calcium ion homeostasis (GO:0055074)|calcium ion import (GO:0070509)|calcium ion transport (GO:0006816)|cation homeostasis (GO:0055080)|cation transmemb…	binding (GO:0005488)|calcium channel inhibitor activity (GO:0019855)|calcium channel regulator activity (GO:0005246)|cation transmembrane transporter activity (GO:0008324)|channel inhibitor activity (GO:0016248)|channel regulator activity (GO:0016247)|inorganic cation transmembrane transporter activity (GO:0022890)|inorganic molecular entity transmembrane transporter activity (GO:0015318)|ion cha…	asymmetric synapse (GO:0032279)|cell junction (GO:0030054)|cell periphery (GO:0071944)|cellular anatomical entity (GO:0110165)|cellular_component (GO:0005575)|cytoplasm (GO:0005737)|endomembrane system (GO:0012505)|endoplasmic reticulum (GO:0005783)|envelope (GO:0031975)|Golgi apparatus (GO:0005794)|integral component of membrane (GO:0016021)|integral component of plasma membrane (GO:0005887)|int…	hsa04978 Mineral absorption	Transport of bile salts and organic acids, metal ions and amine compounds (WP1935)|Zinc homeostasis (WP3529)	UP	-	-	-	-	-	P5	-0.457054	0.472959	0.315067	0.365197	0.655729	0.823805	0.708865	0.324885	0.196511	0.305439	-0.406887	0.304765	0.303793	0.0294123	0.240179	0.00652197	-1.04255	0.517715	-0.770162	1.65413	-0.164937	1.29664	0.620903	0.0509128	0.90375	-0.958782	0.480679	0.487167	0.421541	-0.40708	0.125695	0.621908	-0.49911	0.193228	0.96501	0.847513
VPS50	VPS50 subunit of EARP/GARPII complex	amide transport (GO:0042886)|anion transport (GO:0006820)|biological_process (GO:0008150)|cellular localization (GO:0051641)|cellular process (GO:0009987)|endocytic recycling (GO:0032456)|endosomal transport (GO:0016197)|establishment of localization (GO:0051234)|establishment of localization in cell (GO:0051649)|establishment of protein localization (GO:0045184)|intracellular transport (GO:00469…	binding (GO:0005488)|molecular_function (GO:0003674)|protein binding (GO:0005515)|SNARE binding (GO:0000149)	cellular anatomical entity (GO:0110165)|cellular_component (GO:0005575)|cytoplasm (GO:0005737)|cytoplasmic vesicle (GO:0031410)|cytosol (GO:0005829)|EARP complex (GO:1990745)|endomembrane system (GO:0012505)|endosome (GO:0005768)|extracellular exosome (GO:0070062)|extracellular organelle (GO:0043230)|extracellular region (GO:0005576)|extracellular space (GO:0005615)|extracellular vesicle (GO:1903…			UP	-	-	-	-	-	P5	0.360186	0.873014	-0.0384553	0.613096	0.190994	0.0705083	0.177815	0.471746	0.508218	0.182141	0.0431806	-0.304209	-0.0313528	-0.617812	-0.219542	-0.358608	0.505382	0.534953	-0.185905	0.573065	0.230584	-0.710498	0.533324	1.04912	-0.322068	0.0373054	-0.273395	-0.150545	0.287946	0.772902	-0.118284	-0.709711	-0.367634	0.54815	1.06934	0.704028
ATF4	activating transcription factor 4	adaptive thermogenesis (GO:1990845)|alpha-amino acid metabolic process (GO:1901605)|amide biosynthetic process (GO:0043604)|anatomical structure development (GO:0048856)|anatomical structure morphogenesis (GO:0009653)|animal organ development (GO:0048513)|animal organ morphogenesis (GO:0009887)|anion transport (GO:0006820)|anterograde trans-synaptic signaling (GO:0098916)|apoptotic process (GO:00…	binding (GO:0005488)|cAMP response element binding protein binding (GO:0008140)|cis-regulatory region sequence-specific DNA binding (GO:0000987)|DNA-binding transcription activator activity (GO:0001216)|DNA-binding transcription activator activity, RNA polymerase II-specific (GO:0001228)|DNA-binding transcription factor activity (GO:0003700)|DNA-binding transcription factor activity, RNA polymera…	ATF1-ATF4 transcription factor complex (GO:1990590)|ATF4-CREB1 transcription factor complex (GO:1990589)|cell leading edge (GO:0031252)|cell periphery (GO:0071944)|cell projection (GO:0042995)|cell projection membrane (GO:0031253)|cellular anatomical entity (GO:0110165)|cellular_component (GO:0005575)|centrosome (GO:0005813)|CHOP-ATF4 complex (GO:1990617)|chromatin (GO:0000785)|chromosome (GO:000…	hsa04010 MAPK signaling pathway|hsa04022 cGMP-PKG signaling pathway|hsa04137 Mitophagy - animal|hsa04141 Protein processing in endoplasmic reticulum|hsa04151 PI3K-Akt signaling pathway|hsa04210 Apoptosis|hsa04211 Longevity regulating pathway|hsa04261 Adrenergic signaling in cardiomyocytes|hsa04668 TNF signaling pathway|hsa04720 Long-term potentiation|hsa04722 Neurotrophin signaling pathway|hsa047…	7q11.23 copy number variation syndrome (WP4932)|Alzheimer's disease (WP5124)|Alzheimer's disease and miRNA effects (WP2059)|ATF4 activates genes in response to endoplasmic reticulum stress (WP2753)|ATF6 (ATF6-alpha) activates chaperone genes (WP2655)|Circadian rhythm genes (WP3594)|Endoplasmic reticulum stress response in coronavirus infection (WP4861)|Focal adhesion: PI3K-Akt-mTOR-signaling path…	-	-	UP	-	-	-	P5	0.0705684	1.17214	0.847341	-0.199404	0.2927	0.3734	0.180081	0.434533	1.43391	0.0482476	0.604048	0.923279	-0.246326	0.897875	0.270014	1.06668	0.798189	0.0555012	0.970466	0.842598	1.50172	1.1271	-0.409522	0.307591	0.319927	-0.0849079	0.869401	0.567116	1.31785	-0.00309565	0.505683	0.448528	1.59069	0.297574	0.793576	0.373986
EIF1	eukaryotic translation initiation factor 1	amide biosynthetic process (GO:0043604)|biological regulation (GO:0065007)|biological_process (GO:0008150)|biosynthetic process (GO:0009058)|cellular amide metabolic process (GO:0043603)|cellular biosynthetic process (GO:0044249)|cellular macromolecule biosynthetic process (GO:0034645)|cellular macromolecule metabolic process (GO:0044260)|cellular metabolic process (GO:0044237)|cellular nitrogen …	binding (GO:0005488)|heterocyclic compound binding (GO:1901363)|molecular_function (GO:0003674)|nucleic acid binding (GO:0003676)|organic cyclic compound binding (GO:0097159)|protein-containing complex binding (GO:0044877)|protein binding (GO:0005515)|ribonucleoprotein complex binding (GO:0043021)|ribosomal small subunit binding (GO:0043024)|RNA binding (GO:0003723)|translation factor activity, R…	cellular anatomical entity (GO:0110165)|cellular_component (GO:0005575)|cytoplasm (GO:0005737)|eukaryotic 43S preinitiation complex (GO:0016282)|intracellular anatomical structure (GO:0005622)|intracellular membrane-bounded organelle (GO:0043231)|intracellular organelle (GO:0043229)|membrane-bounded organelle (GO:0043227)|nucleus (GO:0005634)|organelle (GO:0043226)|protein-containing complex (GO:…		nsp1 from SARS-CoV-2 inhibits translation initiation in the host cell (WP5027)|Translation factors (WP107)	-	-	-	-	UP	-	P5	0.20697	0.293429	0.423422	-0.098806	-0.084688	0.418308	0.354145	0.0215546	0.862159	-0.173287	0.130696	0.216578	0.348203	0.586567	-0.100731	0.54271	0.620041	-0.0686098	0.496437	-0.0303384	0.949973	0.222082	0.323688	0.53182	0.596211	0.496032	0.382464	0.0938446	0.784549	-0.176791	0.714349	0.600161	0.841105	0.519197	0.538213	0.0490912
LGALS3	galectin 3	activation of immune response (GO:0002253)|anatomical structure development (GO:0048856)|animal organ development (GO:0048513)|antigen receptor-mediated signaling pathway (GO:0050851)|apoptotic process (GO:0006915)|apoptotic signaling pathway (GO:0097190)|biological adhesion (GO:0022610)|biological process involved in interspecies interaction between organisms (GO:0044419)|biological regulation (…	binding (GO:0005488)|carbohydrate binding (GO:0030246)|chemoattractant activity (GO:0042056)|enzyme binding (GO:0019899)|enzyme inhibitor activity (GO:0004857)|enzyme regulator activity (GO:0030234)|extracellular matrix binding (GO:0050840)|heterocyclic compound binding (GO:1901363)|IgE binding (GO:0019863)|immunoglobulin binding (GO:0019865)|laminin binding (GO:0043236)|molecular function regula…	bounding membrane of organelle (GO:0098588)|cell periphery (GO:0071944)|cell surface (GO:0009986)|cellular anatomical entity (GO:0110165)|cellular_component (GO:0005575)|collagen-containing extracellular matrix (GO:0062023)|cytoplasm (GO:0005737)|cytoplasmic vesicle (GO:0031410)|cytoplasmic vesicle membrane (GO:0030659)|endomembrane system (GO:0012505)|envelope (GO:0031975)|external encapsulating…		2q13 copy number variation syndrome (WP5222)|Advanced glycosylation endproduct receptor signaling (WP1781)|AGE/RAGE pathway (WP2324)|Neutrophil degranulation (WP4049)|Role of immune system in pancreatic cancer (WP5078)|Spinal cord injury (WP2431)|Transcriptional regulation by RUNX1 (WP4105)|Transcriptional regulation by RUNX2 (WP4415)	-	-	-	-	UP	-	P5	0.483919	0.955541	1.08282	0.818277	0.135291	-0.116053	0.279551	1.0316	0.60526	-0.806457	-0.480737	0.508834	0.603997	0.680887	0.0845104	-0.393012	1.10215	0.373071	0.347441	1.45263	1.48642	0.692626	0.851288	0.284341	0.623996	0.671597	0.391356	0.497918	1.41887	0.355098	0.204308	0.424866	1.09787	0.303587	0.261741	0.705047
MTHFD2	methylenetetrahydrofolate dehydrogenase (NADP+ dependent) 2, methenyltetrahydrofolate cyclohydrolase	biological_process (GO:0008150)|carboxylic acid metabolic process (GO:0019752)|cellular amide metabolic process (GO:0043603)|cellular aromatic compound metabolic process (GO:0006725)|cellular metabolic process (GO:0044237)|cellular modified amino acid metabolic process (GO:0006575)|cellular nitrogen compound metabolic process (GO:0034641)|cellular process (GO:0009987)|dicarboxylic acid metabolic …	anion binding (GO:0043168)|binding (GO:0005488)|catalytic activity (GO:0003824)|cation binding (GO:0043169)|cyclohydrolase activity (GO:0019238)|hydrolase activity (GO:0016787)|hydrolase activity, acting on carbon-nitrogen (but not peptide) bonds (GO:0016810)|hydrolase activity, acting on carbon-nitrogen (but not peptide) bonds, in cyclic amidines (GO:0016814)|ion binding (GO:0043167)|magnesium i…	cellular anatomical entity (GO:0110165)|cellular_component (GO:0005575)|cytoplasm (GO:0005737)|extracellular region (GO:0005576)|extracellular space (GO:0005615)|intracellular anatomical structure (GO:0005622)|intracellular membrane-bounded organelle (GO:0043231)|intracellular organelle (GO:0043229)|intracellular organelle lumen (GO:0070013)|membrane-bounded organelle (GO:0043227)|membrane-enclos…	hsa00670 One carbon pool by folate|hsa01100 Metabolic pathways|hsa01240 Biosynthesis of cofactors	Folate metabolism (WP176)|Metabolism of folate and pterines (WP3806)|miR-targeted genes in epithelium (WP2002)|miR-targeted genes in leukocytes (WP2003)|miR-targeted genes in lymphocytes (WP2004)|miR-targeted genes in muscle cell (WP2005)|Nucleotide metabolism (WP404)|One-carbon metabolism (WP241)|Trans-sulfuration and one-carbon metabolism (WP2525)	-	-	-	-	UP	UP	P5	0.801434	0.278247	0.275944	0.923122	0.179773	0.691824	0.324028	0.659658	1.63024	0.280311	0.664039	0.028014	0.793609	0.249471	-0.41376	0.393551	1.30358	0.798624	0.755556	0.431257	1.55963	0.920856	1.30419	0.403301	0.474661	0.0885178	1.7812	0.806831	1.60856	0.498156	0.66876	0.681369	1.85236	0.424158	-0.00606396	0.179298
NAA60	N-alpha-acetyltransferase 60, NatF catalytic subunit	biological_process (GO:0008150)|cell population proliferation (GO:0008283)|cellular component assembly (GO:0022607)|cellular component biogenesis (GO:0044085)|cellular component organization (GO:0016043)|cellular component organization or biogenesis (GO:0071840)|cellular macromolecule metabolic process (GO:0044260)|cellular metabolic process (GO:0044237)|cellular process (GO:0009987)|cellular pro…	acetyltransferase activity (GO:0016407)|binding (GO:0005488)|catalytic activity (GO:0003824)|catalytic activity, acting on a protein (GO:0140096)|H4 histone acetyltransferase activity (GO:0010485)|histone acetyltransferase activity (GO:0004402)|identical protein binding (GO:0042802)|molecular_function (GO:0003674)|N-acetyltransferase activity (GO:0008080)|N-acyltransferase activity (GO:0016410)|p…	bounding membrane of organelle (GO:0098588)|cellular anatomical entity (GO:0110165)|cellular_component (GO:0005575)|cytoplasm (GO:0005737)|endomembrane system (GO:0012505)|Golgi apparatus (GO:0005794)|Golgi apparatus subcompartment (GO:0098791)|Golgi membrane (GO:0000139)|intracellular anatomical structure (GO:0005622)|intracellular membrane-bounded organelle (GO:0043231)|intracellular organelle …			-	-	-	-	UP	-	P5	-0.263982	-0.0288894	-0.308085	0.352922	0.0847602	0.711838	-0.603403	-0.0184988	0.244362	-0.316834	-0.29241	0.113694	0.0713305	-0.0412507	1.11958	0.0348677	0.379247	-0.216341	0.240633	0.0634507	0.418391	0.455372	0.16043	0.0838895	0.437766	0.975289	0.672624	0.323174	0.414287	0.240356	-0.54697	-0.0639744	0.53863	0.849967	0.0755121	0.178589
SPG21	SPG21 abhydrolase domain containing, maspardin	activation of immune response (GO:0002253)|antigen receptor-mediated signaling pathway (GO:0050851)|biological regulation (GO:0065007)|biological_process (GO:0008150)|cell communication (GO:0007154)|cell surface receptor signaling pathway (GO:0007166)|cellular process (GO:0009987)|cellular response to stimulus (GO:0051716)|immune response-activating cell surface receptor signaling pathway (GO:000…	binding (GO:0005488)|CD4 receptor binding (GO:0042609)|molecular_function (GO:0003674)|protein binding (GO:0005515)|signaling receptor binding (GO:0005102)	bounding membrane of organelle (GO:0098588)|cellular anatomical entity (GO:0110165)|cellular_component (GO:0005575)|clathrin-coated vesicle (GO:0030136)|coated vesicle (GO:0030135)|cytoplasm (GO:0005737)|cytoplasmic vesicle (GO:0031410)|cytosol (GO:0005829)|endomembrane system (GO:0012505)|endosome (GO:0005768)|endosome membrane (GO:0010008)|Golgi-associated vesicle (GO:0005798)|Golgi apparatus (…	hsa04144 Endocytosis		-	-	-	-	UP	-	P5	-0.0763287	0.188362	0.216335	-0.001551	-0.0287459	0.488204	0.75398	0.428645	0.146642	0.611433	-0.109832	0.935479	0.121904	-0.0609661	-0.287717	-0.37316	-0.318949	0.143264	0.352739	-0.504316	0.613951	0.580975	0.183571	0.909209	0.324095	0.838464	0.722663	0.211499	0.401565	-0.392567	0.375681	0.22026	0.0955104	-0.953149	0.378184	0.191957
DSC2	desmocollin 2	actin-mediated cell contraction (GO:0070252)|actin filament-based movement (GO:0030048)|actin filament-based process (GO:0030029)|action potential (GO:0001508)|anatomical structure development (GO:0048856)|animal organ development (GO:0048513)|biological adhesion (GO:0022610)|biological regulation (GO:0065007)|biological_process (GO:0008150)|blood circulation (GO:0008015)|bundle of His cell-Purki…	binding (GO:0005488)|calcium ion binding (GO:0005509)|cation binding (GO:0043169)|cell-cell adhesion mediator activity (GO:0098632)|cell adhesion mediator activity (GO:0098631)|cell adhesion molecule binding (GO:0050839)|cell adhesive protein binding involved in bundle of His cell-Purkinje myocyte communication (GO:0086083)|ion binding (GO:0043167)|metal ion binding (GO:0046872)|molecular_functio…	adherens junction (GO:0005912)|anchoring junction (GO:0070161)|cell-cell contact zone (GO:0044291)|cell-cell junction (GO:0005911)|cell junction (GO:0030054)|cell periphery (GO:0071944)|cellular anatomical entity (GO:0110165)|cellular_component (GO:0005575)|cornified envelope (GO:0001533)|cytoplasm (GO:0005737)|cytoplasmic vesicle (GO:0031410)|desmosome (GO:0030057)|extracellular exosome (GO:0070…	hsa05412 Arrhythmogenic right ventricular cardiomyopathy	Arrhythmogenic right ventricular cardiomyopathy (WP2118)|Hair follicle development: cytodifferentiation - part 3 of 3 (WP2840)|Keratinization (WP4087)	-	-	-	-	-	UP	P5	0.560813	-0.110803	-0.0636116	0.0609792	-0.327852	0.663738	0.206002	0.569545	-0.00454381	0.432421	0.255586	-0.159572	-0.325151	-0.400618	-0.481033	0.720323	0.332919	-0.264103	0.116623	-0.726008	0.938255	0.335175	0.502644	0.149637	-0.364389	-0.018817	0.645357	0.499985	1.08378	-0.481326	-0.1723	-0.212745	1.39957	0.0184971	0.00955099	0.35012
TDO2	tryptophan 2,3-dioxygenase	acetyl-CoA metabolic process (GO:0006084)|acyl-CoA metabolic process (GO:0006637)|alpha-amino acid catabolic process (GO:1901606)|alpha-amino acid metabolic process (GO:1901605)|amine catabolic process (GO:0009310)|amine metabolic process (GO:0009308)|aromatic amino acid family catabolic process (GO:0009074)|aromatic amino acid family metabolic process (GO:0009072)|aromatic compound catabolic pro…	amino acid binding (GO:0016597)|anion binding (GO:0043168)|binding (GO:0005488)|carboxylic acid binding (GO:0031406)|catalytic activity (GO:0003824)|cation binding (GO:0043169)|dioxygenase activity (GO:0051213)|heme binding (GO:0020037)|heterocyclic compound binding (GO:1901363)|identical protein binding (GO:0042802)|ion binding (GO:0043167)|metal ion binding (GO:0046872)|molecular_function (GO:0…	cellular anatomical entity (GO:0110165)|cellular_component (GO:0005575)|cytoplasm (GO:0005737)|cytosol (GO:0005829)|intracellular anatomical structure (GO:0005622)	hsa00380 Tryptophan metabolism|hsa01100 Metabolic pathways|hsa01240 Biosynthesis of cofactors	Amino acid metabolism (WP3925)|Kynurenine pathway and links to cell senescence (WP5044)|Monoamine transport (WP727)|NAD biosynthesis II (from tryptophan) (WP2485)|NAD+ biosynthetic pathways (WP3645)|Tryptophan catabolism (WP4994)|Tryptophan catabolism leading to NAD+ production (WP4210)|Tryptophan metabolism (WP465)	-	-	-	-	-	UP	P5	-0.318054	0.5303	-0.0265261	0.388091	-0.22114	-0.225224	-0.10296	1.37754	1.12835	0.0791345	1.19387	-0.125764	-0.0810737	-0.0560134	0.123162	1.25465	0.886388	0.147322	-0.912929	-0.10919	1.61637	0.0861898	0.358016	0.192078	0.925649	-0.881523	1.46589	1.58474	1.58205	-0.121889	1.60489	0.236894	1.47744	-1.08574	0.502292	0.198512
APOBEC3D	apolipoprotein B mRNA editing enzyme catalytic subunit 3D	aromatic compound catabolic process (GO:0019439)|base conversion or substitution editing (GO:0016553)|biological process involved in interspecies interaction between organisms (GO:0044419)|biological process involved in symbiotic interaction (GO:0044403)|biological regulation (GO:0065007)|biological_process (GO:0008150)|carbohydrate derivative catabolic process (GO:1901136)|carbohydrate derivativ…	binding (GO:0005488)|catalytic activity (GO:0003824)|cation binding (GO:0043169)|cytidine deaminase activity (GO:0004126)|deaminase activity (GO:0019239)|deoxycytidine deaminase activity (GO:0047844)|heterocyclic compound binding (GO:1901363)|hydrolase activity (GO:0016787)|hydrolase activity, acting on carbon-nitrogen (but not peptide) bonds (GO:0016810)|hydrolase activity, acting on carbon-nitr…	cellular anatomical entity (GO:0110165)|cellular_component (GO:0005575)|cytoplasm (GO:0005737)|cytoplasmic ribonucleoprotein granule (GO:0036464)|intracellular anatomical structure (GO:0005622)|intracellular membrane-bounded organelle (GO:0043231)|intracellular non-membrane-bounded organelle (GO:0043232)|intracellular organelle (GO:0043229)|membrane-bounded organelle (GO:0043227)|non-membrane-bou…	hsa05170 Human immunodeficiency virus 1 infection		UP	-	-	-	-	-	P6	0.512149	0.297097	-0.176065	-0.170362	0.328695	1.02601	0.307799	0.899516	1.0293	0.837724	0.270286	-0.283745	0.173762	-0.376003	-0.552995	0.148375	-0.697122	-1.35094	0.77669	-0.580647	1.17597	0.40897	-0.825653	-0.0863371	0.0238531	0.0339206	0.867281	0.739117	0.810547	-0.451101	0.296214	0.076525	-0.55568	-0.331317	0.512416	1.11307
CNKSR3	CNKSR family member 3	biological regulation (GO:0065007)|biological_process (GO:0008150)|cation transport (GO:0006812)|cell communication (GO:0007154)|cellular macromolecule metabolic process (GO:0044260)|cellular metabolic process (GO:0044237)|cellular process (GO:0009987)|cellular protein metabolic process (GO:0044267)|cellular protein modification process (GO:0006464)|cellular response to stimulus (GO:0051716)|ERK1…	binding (GO:0005488)|molecular_function (GO:0003674)|protein binding (GO:0005515)	apical part of cell (GO:0045177)|apical plasma membrane (GO:0016324)|cell periphery (GO:0071944)|cellular anatomical entity (GO:0110165)|cellular_component (GO:0005575)|cytoplasm (GO:0005737)|intracellular anatomical structure (GO:0005622)|membrane (GO:0016020)|plasma membrane (GO:0005886)|plasma membrane region (GO:0098590)			UP	-	-	-	-	-	P6	0.404941	0.818418	0.218629	0.100182	0.718666	0.290043	-0.234688	-0.0101397	0.669689	0.646119	-0.284558	-0.777974	0.120838	-0.78572	-0.24055	-0.268305	0.435523	-0.211315	0.404086	-0.70175	-0.513062	-0.206277	0.171794	-0.238251	-0.275807	1.38878	-0.198436	1.17065	0.780611	-0.189275	-0.0176465	-0.459106	0.119291	-0.238456	0.0741147	0.612424
CNTN4	contactin 4	anatomical structure development (GO:0048856)|anatomical structure morphogenesis (GO:0009653)|animal organ development (GO:0048513)|anterograde trans-synaptic signaling (GO:0098916)|axon development (GO:0061564)|axon guidance (GO:0007411)|axonal fasciculation (GO:0007413)|axonogenesis (GO:0007409)|biological adhesion (GO:0022610)|biological regulation (GO:0065007)|biological_process (GO:0008150)|…	binding (GO:0005488)|cell-cell adhesion mediator activity (GO:0098632)|cell adhesion mediator activity (GO:0098631)|cell adhesion molecule binding (GO:0050839)|molecular_function (GO:0003674)|protein binding (GO:0005515)	anchored component of membrane (GO:0031225)|axon (GO:0030424)|cell periphery (GO:0071944)|cell projection (GO:0042995)|cellular anatomical entity (GO:0110165)|cellular_component (GO:0005575)|extracellular region (GO:0005576)|intrinsic component of membrane (GO:0031224)|membrane (GO:0016020)|neuron projection (GO:0043005)|plasma membrane (GO:0005886)|plasma membrane bounded cell projection (GO:012…		Post-translational modification: synthesis of GPI-anchored proteins (WP1887)	UP	-	-	-	-	-	P6	0.0589951	0.194295	0.506343	0.973165	0.0887084	0.446988	0.0285186	0.665543	0.663148	0.279732	0.011959	-0.392327	0.403742	-0.027895	0.148443	0.863132	-1.12625	0.11375	-0.372067	0.408058	0.0258135	0.427687	-0.5054	0.150946	-0.784751	0.597468	0.541734	-0.138604	0.037746	-0.183575	-0.525745	0.566278	0.119197	0.102334	0.0733583	-0.122207
CPSF6	cleavage and polyadenylation specific factor 6	anion transport (GO:0006820)|biological regulation (GO:0065007)|biological_process (GO:0008150)|cellular aromatic compound metabolic process (GO:0006725)|cellular component assembly (GO:0022607)|cellular component biogenesis (GO:0044085)|cellular component organization (GO:0016043)|cellular component organization or biogenesis (GO:0071840)|cellular localization (GO:0051641)|cellular metabolic pro…	binding (GO:0005488)|exon-exon junction complex binding (GO:1990448)|heterocyclic compound binding (GO:1901363)|molecular_function (GO:0003674)|mRNA binding (GO:0003729)|nucleic acid binding (GO:0003676)|organic cyclic compound binding (GO:0097159)|protein-containing complex binding (GO:0044877)|protein binding (GO:0005515)|ribonucleoprotein complex binding (GO:0043021)|ribosomal large subunit bi…	cellular anatomical entity (GO:0110165)|cellular_component (GO:0005575)|chromatin (GO:0000785)|chromosome (GO:0005694)|cytoplasm (GO:0005737)|interchromatin granule (GO:0035061)|intracellular anatomical structure (GO:0005622)|intracellular membrane-bounded organelle (GO:0043231)|intracellular non-membrane-bounded organelle (GO:0043232)|intracellular organelle (GO:0043229)|intracellular organelle …	hsa03015 mRNA surveillance pathway	Signaling by FGFR1 (WP3335)	UP	-	-	-	-	-	P6	0.159024	0.189981	-0.181881	0.375582	0.338583	0.576596	0.450267	0.492773	0.503487	0.609969	0.00541752	-0.282424	0.148179	-1.41275	0.210841	0.435457	-0.928653	-1.06295	1.10593	-0.304657	0.38031	0.114483	0.237953	0.849944	-1.04407	0.762143	0.369635	0.126549	0.675193	0.321981	0.363211	0.213167	-0.912559	-0.428362	-0.211446	0.118882
CXCL8	C-X-C motif chemokine ligand 8	anatomical structure development (GO:0048856)|anatomical structure formation involved in morphogenesis (GO:0048646)|anatomical structure morphogenesis (GO:0009653)|angiogenesis (GO:0001525)|animal organ development (GO:0048513)|antimicrobial humoral immune response mediated by antimicrobial peptide (GO:0061844)|antimicrobial humoral response (GO:0019730)|biological adhesion (GO:0022610)|biologica…	binding (GO:0005488)|chemokine activity (GO:0008009)|chemokine receptor binding (GO:0042379)|CXCR chemokine receptor binding (GO:0045236)|cytokine activity (GO:0005125)|cytokine receptor binding (GO:0005126)|G protein-coupled receptor binding (GO:0001664)|interleukin-8 receptor binding (GO:0005153)|molecular function regulator (GO:0098772)|molecular_function (GO:0003674)|protein binding (GO:00055…	cellular anatomical entity (GO:0110165)|cellular_component (GO:0005575)|extracellular region (GO:0005576)|extracellular space (GO:0005615)	hsa04060 Cytokine-cytokine receptor interaction|hsa04061 Viral protein interaction with cytokine and cytokine receptor|hsa04062 Chemokine signaling pathway|hsa04064 NF-kappa B signaling pathway|hsa04072 Phospholipase D signaling pathway|hsa04218 Cellular senescence|hsa04620 Toll-like receptor signaling pathway|hsa04621 NOD-like receptor signaling pathway|hsa04622 RIG-I-like receptor signaling pat…	Allograft rejection (WP2328)|Antiviral and anti-inflammatory effects of Nrf2 on SARS-CoV-2 pathway (WP5113)|ATF4 activates genes in response to endoplasmic reticulum stress (WP2753)|Bladder cancer (WP2828)|Burn wound healing (WP5055)|Cells and molecules involved in local acute inflammatory response (WP4493)|Class A/1 (rhodopsin-like receptors) (WP4419)|Corticotropin-releasing hormone signaling pa…	UP	-	-	-	-	-	P6	0.682313	0.689649	0.223482	0.201473	0.363557	1.03346	0.714661	0.765783	0.946963	0.109925	0.0618454	-1.08095	-1.09417	0.130364	-0.185801	-0.691106	-0.186553	0.297944	-0.148936	0.660755	0.273495	0.0966535	0.71164	-0.845069	0.139908	-1.71219	-0.248076	1.77079	2.18438	0.812406	0.242364	-0.11375	0.583319	1.15363	0.116742	0.507761
CYBA	cytochrome b-245 alpha chain	antigen processing and presentation (GO:0019882)|antigen processing and presentation of exogenous antigen (GO:0019884)|antigen processing and presentation of exogenous peptide antigen (GO:0002478)|antigen processing and presentation of exogenous peptide antigen via MHC class I (GO:0042590)|antigen processing and presentation of exogenous peptide antigen via MHC class I, TAP-dependent (GO:0002479)…	binding (GO:0005488)|catalytic activity (GO:0003824)|cation binding (GO:0043169)|electron transfer activity (GO:0009055)|heme binding (GO:0020037)|heterocyclic compound binding (GO:1901363)|ion binding (GO:0043167)|metal ion binding (GO:0046872)|molecular_function (GO:0003674)|organic cyclic compound binding (GO:0097159)|oxidoreductase activity (GO:0016491)|oxidoreductase activity, acting on NAD(…	bounding membrane of organelle (GO:0098588)|catalytic complex (GO:1902494)|cell periphery (GO:0071944)|cellular anatomical entity (GO:0110165)|cellular_component (GO:0005575)|cytoplasm (GO:0005737)|cytoplasmic vesicle (GO:0031410)|cytoplasmic vesicle membrane (GO:0030659)|endocytic vesicle (GO:0030139)|endocytic vesicle membrane (GO:0030666)|endomembrane system (GO:0012505)|endoplasmic reticulum …	hsa04145 Phagosome|hsa04380 Osteoclast differentiation|hsa04621 NOD-like receptor signaling pathway|hsa04670 Leukocyte transendothelial migration|hsa05020 Prion disease|hsa05140 Leishmaniasis|hsa05418 Fluid shear stress and atherosclerosis	Class I MHC mediated antigen processing and presentation (WP3577)|Detoxification of reactive oxygen species (WP2824)|Microglia pathogen phagocytosis pathway (WP3937)|Neutrophil degranulation (WP4049)|RHO GTPases activate NADPH oxidases (WP3396)|ROS and RNS production in phagocytes (WP3551)|Signaling by VEGF (WP1919)|TNF-alpha signaling pathway (WP231)|WNT5:FZD7-mediated leishmania damping (WP5005)	UP	-	-	-	-	-	P6	0.169197	0.0811167	0.345242	0.376709	-0.0374384	0.816921	0.661193	0.113731	0.832932	0.187724	-0.627541	0.253885	0.164495	0.188101	-0.0517394	0.54079	-0.125367	0.450972	0.0503865	-0.116675	0.380645	0.161981	-0.635911	0.129955	0.548054	-0.890141	0.0813006	0.333999	-0.297292	-0.261071	-0.833062	0.922489	-0.431886	-0.0845184	-0.0978406	0.3538
DCLRE1C	DNA cross-link repair 1C	adaptive immune response (GO:0002250)|anatomical structure development (GO:0048856)|anatomical structure homeostasis (GO:0060249)|animal organ development (GO:0048513)|B cell activation (GO:0042113)|B cell differentiation (GO:0030183)|biological regulation (GO:0065007)|biological_process (GO:0008150)|cell activation (GO:0001775)|cell differentiation (GO:0030154)|cellular aromatic compound metabol…	5'-3' exodeoxyribonuclease activity (GO:0035312)|5'-3' exonuclease activity (GO:0008409)|binding (GO:0005488)|catalytic activity (GO:0003824)|catalytic activity, acting on DNA (GO:0140097)|damaged DNA binding (GO:0003684)|deoxyribonuclease activity (GO:0004536)|DNA binding (GO:0003677)|endodeoxyribonuclease activity (GO:0004520)|endonuclease activity (GO:0004519)|exodeoxyribonuclease activity (GO…	cellular anatomical entity (GO:0110165)|cellular_component (GO:0005575)|cytoplasm (GO:0005737)|DNA repair complex (GO:1990391)|endomembrane system (GO:0012505)|Golgi apparatus (GO:0005794)|intracellular anatomical structure (GO:0005622)|intracellular membrane-bounded organelle (GO:0043231)|intracellular organelle (GO:0043229)|intracellular organelle lumen (GO:0070013)|intracellular protein-contai…	hsa03450 Non-homologous end-joining|hsa05340 Primary immunodeficiency	ATM signaling in development and disease (WP3878)|DNA IR-double strand breaks and cellular response via ATM (WP3959)|DNA repair pathways, full network (WP4946)|Non-homologous end joining (WP438)|Nonhomologous End-Joining (NHEJ) (WP3550)	UP	-	-	-	-	-	P6	-0.0444425	0.451146	0.402128	1.27149	1.12897	0.613308	0.688395	-0.0217962	-0.0566092	0.410185	-0.339565	-0.511585	0.0819483	-0.054752	-0.0115547	1.61537	0.265662	-0.309311	-0.0595283	0.723281	-0.0239975	0.704848	1.15404	-0.171285	-0.223218	-0.85162	0.101662	0.00810533	-0.107365	-0.696623	-0.570175	0.573441	-0.166879	-0.0576469	1.09755	0.848649
DLGAP1-AS1	DLGAP1 antisense RNA 1						UP	-	-	-	-	-	P6	0.630195	0.455848	0.138488	0.56136	0.725214	0.614963	0.436662	-0.0216542	0.280952	-0.285329	0.0991244	-0.0719568	0.402985	-0.0811894	-0.314717	-0.236185	0.326875	0.391393	-0.668321	-0.494218	0.339533	0.419691	0.31956	-0.177919	-1.03674	0.0314188	-0.371972	-0.29553	-0.345598	-0.755763	-0.298143	-0.173788	0.157766	-0.295354	-0.245145	0.365822
EVI2A	ecotropic viral integration site 2A		binding (GO:0005488)|molecular transducer activity (GO:0060089)|molecular_function (GO:0003674)|protein binding (GO:0005515)|signaling receptor activity (GO:0038023)|transmembrane signaling receptor activity (GO:0004888)	cellular anatomical entity (GO:0110165)|cellular_component (GO:0005575)|integral component of membrane (GO:0016021)|intrinsic component of membrane (GO:0031224)|membrane (GO:0016020)			UP	-	-	-	-	-	P6	0.316323	0.695391	0.300899	0.350144	-0.313825	0.623358	0.51747	0.623364	-0.0582401	0.314619	-0.785263	0.138002	-0.197539	0.568793	0.101634	-0.517373	-0.693273	0.0723019	-0.651019	0.116628	0.429953	0.0631017	0.447022	-0.224693	0.107943	-0.532557	-1.13292	-0.573666	-0.141666	-0.173235	-0.201538	-0.0744017	0.543007	0.111112	1.12565	0.151535
FAM110B	family with sequence similarity 110 member B		binding (GO:0005488)|molecular_function (GO:0003674)|protein binding (GO:0005515)	cellular anatomical entity (GO:0110165)|cellular_component (GO:0005575)|cytoplasm (GO:0005737)|cytoskeleton (GO:0005856)|cytosol (GO:0005829)|intracellular anatomical structure (GO:0005622)|intracellular membrane-bounded organelle (GO:0043231)|intracellular non-membrane-bounded organelle (GO:0043232)|intracellular organelle (GO:0043229)|membrane-bounded organelle (GO:0043227)|microtubule cytoskel…			UP	-	-	-	-	-	P6	-0.3427	0.274241	0.658964	0.476105	1.10303	0.727637	-0.202611	0.711377	0.91727	0.426458	0.565744	-0.224064	0.233587	0.0686789	0.199682	0.298022	-0.454777	0.157944	-0.372693	-1.12275	0.482108	0.539984	-0.000605441	-0.768395	-0.871899	-1.22299	0.780962	0.33984	1.51706	-0.0996734	-0.521263	0.596204	0.413779	0.123302	0.170954	0.9701
GM2A	GM2 ganglioside activator	anion transport (GO:0006820)|behavior (GO:0007610)|biological regulation (GO:0065007)|biological_process (GO:0008150)|carbohydrate catabolic process (GO:0016052)|carbohydrate derivative catabolic process (GO:1901136)|carbohydrate derivative metabolic process (GO:1901135)|carbohydrate metabolic process (GO:0005975)|catabolic process (GO:0009056)|cell activation (GO:0001775)|cell activation involve…	beta-N-acetylgalactosaminidase activity (GO:0032428)|beta-N-acetylhexosaminidase activity (GO:0004563)|catalytic activity (GO:0003824)|enzyme activator activity (GO:0008047)|enzyme regulator activity (GO:0030234)|hexosaminidase activity (GO:0015929)|hydrolase activity (GO:0016787)|hydrolase activity, acting on glycosyl bonds (GO:0016798)|hydrolase activity, hydrolyzing O-glycosyl compounds (GO:00…	apical part of cell (GO:0045177)|apical plasma membrane (GO:0016324)|azurophil granule (GO:0042582)|azurophil granule lumen (GO:0035578)|basal part of cell (GO:0045178)|basal plasma membrane (GO:0009925)|basolateral plasma membrane (GO:0016323)|cell periphery (GO:0071944)|cellular anatomical entity (GO:0110165)|cellular_component (GO:0005575)|cytoplasm (GO:0005737)|cytoplasmic side of membrane (G…	hsa04142 Lysosome	Degradation pathway of sphingolipids, including diseases (WP4153)|Neutrophil degranulation (WP4049)|Sphingolipid metabolism (WP2788)	UP	-	-	-	-	-	P6	-0.146568	0.107388	0.599155	0.715999	0.227905	1.34407	0.560636	0.228304	1.23867	0.983381	-0.299247	0.0201264	0.806622	0.109108	0.0392639	-0.272174	0.0746913	-0.0352037	0.811725	-1.04632	-0.198027	-0.149363	0.216384	0.83042	0.413022	-0.437314	-0.181493	1.1393	0.0318969	-0.0811032	0.900255	0.312585	-0.251555	0.158033	-0.277007	0.337209
KIAA1217	KIAA1217	anatomical structure development (GO:0048856)|biological regulation (GO:0065007)|biological_process (GO:0008150)|chordate embryonic development (GO:0043009)|developmental process (GO:0032502)|embryo development (GO:0009790)|embryo development ending in birth or egg hatching (GO:0009792)|embryonic skeletal system development (GO:0048706)|multicellular organism development (GO:0007275)|multicellula…	enzyme regulator activity (GO:0030234)|molecular function regulator (GO:0098772)|molecular_function (GO:0003674)	cellular anatomical entity (GO:0110165)|cellular_component (GO:0005575)|cytoplasm (GO:0005737)|intracellular anatomical structure (GO:0005622)			UP	-	-	-	-	-	P6	0.654227	0.0985102	-0.0482412	-0.059414	0.692858	1.01595	0.68471	0.743014	0.665744	0.88667	0.0645418	0.278747	0.111683	-0.308778	0.534469	-1.57374	-0.685354	-0.820949	-0.292439	-1.70932	0.865146	-0.20946	0.45457	0.282761	-0.440917	0.0629914	0.658678	-0.416976	-0.412697	0.478362	0.0888735	-0.467622	0.245266	0.419556	0.29829	-0.0589803
MAP4K4	mitogen-activated protein kinase kinase kinase kinase 4	activation of protein kinase activity (GO:0032147)|ameboidal-type cell migration (GO:0001667)|anatomical structure development (GO:0048856)|anatomical structure morphogenesis (GO:0009653)|apoptotic process (GO:0006915)|ARF protein signal transduction (GO:0032011)|biological adhesion (GO:0022610)|biological regulation (GO:0065007)|biological_process (GO:0008150)|cell-matrix adhesion (GO:0007160)|c…	adenyl nucleotide binding (GO:0030554)|adenyl ribonucleotide binding (GO:0032559)|anion binding (GO:0043168)|ATP binding (GO:0005524)|binding (GO:0005488)|carbohydrate derivative binding (GO:0097367)|catalytic activity (GO:0003824)|catalytic activity, acting on a protein (GO:0140096)|creatine kinase activity (GO:0004111)|cytoskeletal protein binding (GO:0008092)|heterocyclic compound binding (GO:…	anchoring junction (GO:0070161)|cell-substrate junction (GO:0030055)|cell junction (GO:0030054)|cellular anatomical entity (GO:0110165)|cellular_component (GO:0005575)|cytoplasm (GO:0005737)|focal adhesion (GO:0005925)|intracellular anatomical structure (GO:0005622)	hsa04010 MAPK signaling pathway	Angiopoietin-like protein 8 regulatory pathway (WP3915)|Hippo-Yap signaling pathway (WP4537)|Insulin signaling (WP481)|Malignant pleural mesothelioma (WP5087)|MAPK signaling pathway (WP382)|Mechanoregulation and pathology of YAP/TAZ via Hippo and non-Hippo mechanisms (WP4534)|Oxidative Stress Induced Senescence (WP3404)	UP	-	-	-	-	-	P6	0.164812	0.593892	0.545615	0.0280718	-0.0428673	0.652007	0.256211	0.710513	0.036703	0.391083	-0.185064	-0.0872443	-0.149007	0.807761	0.154163	0.333946	-0.376458	0.600643	0.17645	0.508521	-0.329859	0.96479	-1.13763	-0.984952	0.430977	0.0748659	0.544607	0.239311	0.46473	0.67672	0.418169	0.0618629	0.686426	-0.394467	-1.14807	0.324012
NAP1L3	nucleosome assembly protein 1 like 3	biological_process (GO:0008150)|cellular component assembly (GO:0022607)|cellular component biogenesis (GO:0044085)|cellular component organization (GO:0016043)|cellular component organization or biogenesis (GO:0071840)|cellular process (GO:0009987)|cellular protein-containing complex assembly (GO:0034622)|chromatin assembly (GO:0031497)|chromatin assembly or disassembly (GO:0006333)|chromatin or…	binding (GO:0005488)|chromatin binding (GO:0003682)|histone binding (GO:0042393)|molecular_function (GO:0003674)|protein binding (GO:0005515)	cellular anatomical entity (GO:0110165)|cellular_component (GO:0005575)|chromatin (GO:0000785)|chromosome (GO:0005694)|intracellular anatomical structure (GO:0005622)|intracellular membrane-bounded organelle (GO:0043231)|intracellular non-membrane-bounded organelle (GO:0043232)|intracellular organelle (GO:0043229)|membrane-bounded organelle (GO:0043227)|non-membrane-bounded organelle (GO:0043228)…			UP	-	-	-	-	-	P6	0.367759	-0.0172386	0.704989	0.728936	0.799602	-0.109734	0.0889385	-0.015931	0.991782	0.507604	0.0204324	-0.576286	0.0637721	-0.0679281	0.153528	0.86349	-0.590084	-0.749644	-0.497139	-0.860851	0.50489	-0.289321	1.12888	-0.33791	-0.604546	0.384706	0.100218	-0.977893	0.0240222	-0.167313	0.0737261	0.476197	-0.754948	-1.12075	0.0775554	0.586191
NEDD9	neural precursor cell expressed, developmentally down-regulated 9	actin cytoskeleton organization (GO:0030036)|actin cytoskeleton reorganization (GO:0031532)|actin filament-based process (GO:0030029)|actin filament bundle assembly (GO:0051017)|actin filament bundle organization (GO:0061572)|actin filament organization (GO:0007015)|actin filament reorganization (GO:0090527)|activation of GTPase activity (GO:0090630)|anatomical structure development (GO:0048856)|…	binding (GO:0005488)|enzyme binding (GO:0019899)|kinase binding (GO:0019900)|molecular_function (GO:0003674)|protein binding (GO:0005515)|protein kinase binding (GO:0019901)|protein tyrosine kinase binding (GO:1990782)	anchoring junction (GO:0070161)|cell-substrate junction (GO:0030055)|cell cortex (GO:0005938)|cell junction (GO:0030054)|cell leading edge (GO:0031252)|cell periphery (GO:0071944)|cell projection (GO:0042995)|cellular anatomical entity (GO:0110165)|cellular_component (GO:0005575)|cytoplasm (GO:0005737)|cytoskeleton (GO:0005856)|cytosol (GO:0005829)|endomembrane system (GO:0012505)|focal adhesion …		TGF-beta signaling pathway (WP366)	UP	-	-	-	-	-	P6	0.32843	0.182431	0.348177	0.588313	-0.0111725	0.70874	0.515503	0.805694	-0.0712991	0.212335	-0.198427	-0.233245	-0.597228	0.14404	-0.238731	-1.36751	-0.311371	-0.348635	0.242547	-0.925094	0.0536062	-0.42487	0.0818054	-0.382584	1.04202	0.0582855	0.294868	0.305163	-0.132737	0.756087	-0.100955	-0.453365	-0.027174	0.327606	-0.220026	0.242389
NEK6	NIMA related kinase 6	aging (GO:0007568)|apoptotic process (GO:0006915)|biological regulation (GO:0065007)|biological_process (GO:0008150)|cell aging (GO:0007569)|cell communication (GO:0007154)|cell cycle (GO:0007049)|cell cycle phase transition (GO:0044770)|cell cycle process (GO:0022402)|cell death (GO:0008219)|cell division (GO:0051301)|cellular component assembly (GO:0022607)|cellular component biogenesis (GO:004…	activating transcription factor binding (GO:0033613)|adenyl nucleotide binding (GO:0030554)|adenyl ribonucleotide binding (GO:0032559)|anion binding (GO:0043168)|ATP binding (GO:0005524)|binding (GO:0005488)|carbohydrate derivative binding (GO:0097367)|catalytic activity (GO:0003824)|catalytic activity, acting on a protein (GO:0140096)|cation binding (GO:0043169)|cytoskeletal protein binding (GO:…	cellular anatomical entity (GO:0110165)|cellular_component (GO:0005575)|centriolar satellite (GO:0034451)|centrosome (GO:0005813)|cytoplasm (GO:0005737)|cytoskeleton (GO:0005856)|cytosol (GO:0005829)|intracellular anatomical structure (GO:0005622)|intracellular membrane-bounded organelle (GO:0043231)|intracellular non-membrane-bounded organelle (GO:0043232)|intracellular organelle (GO:0043229)|in…		Mitotic Prometaphase (WP2652)|Mitotic Prophase (WP2654)	UP	-	-	-	-	-	P6	0.921944	0.641436	0.743671	-0.0898549	0.889225	0.770818	0.100543	0.564265	0.45449	0.0943209	0.611048	-0.107743	-0.288793	-0.572169	0.911296	0.635716	-0.179302	0.621235	0.10392	0.409478	0.535014	-0.268834	-0.247587	0.265479	1.01166	-0.329894	-0.0453453	0.311112	1.01327	0.738995	0.677977	0.188892	0.148226	0.200299	0.761532	-0.0845569
NUPR1	nuclear protein 1, transcriptional regulator	acute inflammatory response (GO:0002526)|ADP metabolic process (GO:0046031)|anatomical structure development (GO:0048856)|animal organ development (GO:0048513)|apoptotic process (GO:0006915)|apoptotic signaling pathway (GO:0097190)|aromatic compound biosynthetic process (GO:0019438)|ATP generation from ADP (GO:0006757)|ATP metabolic process (GO:0046034)|autophagosome assembly (GO:0000045)|autopha…	acetyltransferase activator activity (GO:0010698)|binding (GO:0005488)|chromatin binding (GO:0003682)|DNA binding (GO:0003677)|enzyme activator activity (GO:0008047)|enzyme regulator activity (GO:0030234)|heterocyclic compound binding (GO:1901363)|molecular function regulator (GO:0098772)|molecular_function (GO:0003674)|nucleic acid binding (GO:0003676)|organic cyclic compound binding (GO:0097159…	cellular anatomical entity (GO:0110165)|cellular_component (GO:0005575)|cytoplasm (GO:0005737)|extracellular region (GO:0005576)|intercellular bridge (GO:0045171)|intracellular anatomical structure (GO:0005622)|intracellular membrane-bounded organelle (GO:0043231)|intracellular organelle (GO:0043229)|intracellular organelle lumen (GO:0070013)|membrane-bounded organelle (GO:0043227)|membrane-enclo…	hsa05202 Transcriptional misregulation in cancer		UP	-	-	-	-	-	P6	0.642009	1.23275	0.801584	0.853801	-0.654257	1.2808	-0.219592	0.775063	0.914828	0.681693	0.311178	0.960775	0.696858	0.183274	0.0644054	-0.399144	0.277226	0.188942	0.371464	0.274897	1.36814	0.444891	-0.188952	1.01845	0.072564	0.209572	1.33905	0.909833	0.546377	-0.227411	1.44527	-0.0297806	1.64385	-0.133253	0.724646	-0.762468
PABPC4	poly(A) binding protein cytoplasmic 4	amide biosynthetic process (GO:0043604)|anatomical structure development (GO:0048856)|animal organ development (GO:0048513)|aromatic compound catabolic process (GO:0019439)|biological regulation (GO:0065007)|biological_process (GO:0008150)|biosynthetic process (GO:0009058)|blood coagulation (GO:0007596)|catabolic process (GO:0009056)|cell development (GO:0048468)|cell differentiation (GO:0030154)…	binding (GO:0005488)|heterocyclic compound binding (GO:1901363)|molecular_function (GO:0003674)|mRNA 3'-UTR binding (GO:0003730)|mRNA binding (GO:0003729)|nucleic acid binding (GO:0003676)|organic cyclic compound binding (GO:0097159)|poly-purine tract binding (GO:0070717)|poly-pyrimidine tract binding (GO:0008187)|poly(A) binding (GO:0008143)|poly(U) RNA binding (GO:0008266)|protein binding (GO:0…	cellular anatomical entity (GO:0110165)|cellular_component (GO:0005575)|cytoplasm (GO:0005737)|cytoplasmic ribonucleoprotein granule (GO:0036464)|cytoplasmic stress granule (GO:0010494)|cytosol (GO:0005829)|intracellular anatomical structure (GO:0005622)|intracellular membrane-bounded organelle (GO:0043231)|intracellular non-membrane-bounded organelle (GO:0043232)|intracellular organelle (GO:0043…	hsa03015 mRNA surveillance pathway|hsa03018 RNA degradation		UP	-	-	-	-	-	P6	-0.0825364	0.969049	-0.040211	0.474491	1.36083	0.746586	0.534956	0.428171	0.143437	0.473784	-0.383631	-0.163889	0.159603	-0.677388	0.144033	0.551002	0.320083	-0.372487	1.05855	1.15865	0.0826576	-0.0289075	0.221419	-0.0128747	1.22255	-1.42174	0.677888	0.009921	-0.0388277	-0.213344	-0.554395	0.0525786	0.282275	-0.574039	0.149427	-0.198852
PARP9	poly(ADP-ribose) polymerase family member 9	aromatic compound biosynthetic process (GO:0019438)|biological process involved in interspecies interaction between organisms (GO:0044419)|biological regulation (GO:0065007)|biological_process (GO:0008150)|biosynthetic process (GO:0009058)|cell communication (GO:0007154)|cell migration (GO:0016477)|cell motility (GO:0048870)|cell surface receptor signaling pathway (GO:0007166)|cellular aromatic c…	ADP-D-ribose binding (GO:0072570)|anion binding (GO:0043168)|binding (GO:0005488)|carbohydrate derivative binding (GO:0097367)|catalytic activity (GO:0003824)|catalytic activity, acting on a protein (GO:0140096)|DNA-binding transcription factor binding (GO:0140297)|enzyme binding (GO:0019899)|enzyme inhibitor activity (GO:0004857)|enzyme regulator activity (GO:0030234)|heterocyclic compound bindi…	cellular anatomical entity (GO:0110165)|cellular_component (GO:0005575)|chromosome (GO:0005694)|cytoplasm (GO:0005737)|cytosol (GO:0005829)|intracellular anatomical structure (GO:0005622)|intracellular membrane-bounded organelle (GO:0043231)|intracellular non-membrane-bounded organelle (GO:0043232)|intracellular organelle (GO:0043229)|intracellular organelle lumen (GO:0070013)|membrane-bounded or…		COVID-19 structural coverage map (WP5145)|Nicotinate metabolism (WP4097)|SARS-CoV-1 Infection (WP5020)|SARS-CoV-2 Infection (WP5021)	UP	-	-	-	-	-	P6	-0.443969	0.810564	1.41365	0.0122758	0.818178	0.297007	0.992483	0.84493	0.286754	0.525954	0.360244	-0.366918	1.02298	-0.970397	0.120148	0.0557336	-0.301245	0.0862424	-0.419463	-0.65125	0.948196	-0.42168	-0.426585	-0.679001	-0.0184004	0.942963	1.55329	2.19111	-0.0124734	0.289102	-0.563752	-0.445496	0.914223	0.208668	0.766871	-0.377469
PRRX1	paired related homeobox 1	anatomical structure development (GO:0048856)|anatomical structure morphogenesis (GO:0009653)|animal organ development (GO:0048513)|animal organ morphogenesis (GO:0009887)|appendage development (GO:0048736)|appendage morphogenesis (GO:0035107)|aromatic compound biosynthetic process (GO:0019438)|artery development (GO:0060840)|artery morphogenesis (GO:0048844)|biological regulation (GO:0065007)|bi…	activating transcription factor binding (GO:0033613)|binding (GO:0005488)|cis-regulatory region sequence-specific DNA binding (GO:0000987)|DNA-binding transcription activator activity (GO:0001216)|DNA-binding transcription activator activity, RNA polymerase II-specific (GO:0001228)|DNA-binding transcription factor activity (GO:0003700)|DNA-binding transcription factor activity, RNA polymerase II-…	cellular anatomical entity (GO:0110165)|cellular_component (GO:0005575)|chromatin (GO:0000785)|chromosome (GO:0005694)|cytoplasm (GO:0005737)|cytosol (GO:0005829)|intracellular anatomical structure (GO:0005622)|intracellular membrane-bounded organelle (GO:0043231)|intracellular non-membrane-bounded organelle (GO:0043232)|intracellular organelle (GO:0043229)|intracellular organelle lumen (GO:00700…		Familial partial lipodystrophy (FPLD) (WP5102)	UP	-	-	-	-	-	P6	0.458523	0.817603	0.510676	0.549874	0.350282	0.290653	0.511111	-0.01546	0.668261	0.28827	0.132067	0.126297	-0.820626	0.253937	0.0615929	0.564857	0.0397998	0.102253	0.260749	-0.229914	-0.0510393	0.430249	-0.584857	-0.738685	0.438833	0.0154816	-0.171938	1.00363	0.241395	0.513166	-0.120431	0.279625	-0.983688	-0.519764	0.0740828	-0.195602
RPN1	ribophorin I	biological_process (GO:0008150)|biosynthetic process (GO:0009058)|carbohydrate derivative biosynthetic process (GO:1901137)|carbohydrate derivative metabolic process (GO:1901135)|cellular biosynthetic process (GO:0044249)|cellular macromolecule biosynthetic process (GO:0034645)|cellular macromolecule metabolic process (GO:0044260)|cellular metabolic process (GO:0044237)|cellular process (GO:00099…	binding (GO:0005488)|catalytic activity (GO:0003824)|dolichyl-diphosphooligosaccharide-protein glycotransferase activity (GO:0004579)|heterocyclic compound binding (GO:1901363)|molecular_function (GO:0003674)|nucleic acid binding (GO:0003676)|oligosaccharyl transferase activity (GO:0004576)|organic cyclic compound binding (GO:0097159)|protein binding (GO:0005515)|RNA binding (GO:0003723)|transfer…	catalytic complex (GO:1902494)|cellular anatomical entity (GO:0110165)|cellular_component (GO:0005575)|cytoplasm (GO:0005737)|cytoplasmic vesicle (GO:0031410)|cytosol (GO:0005829)|endomembrane system (GO:0012505)|endoplasmic reticulum (GO:0005783)|endoplasmic reticulum membrane (GO:0005789)|endoplasmic reticulum protein-containing complex (GO:0140534)|endoplasmic reticulum subcompartment (GO:0098…	hsa00510 N-Glycan biosynthesis|hsa00513 Various types of N-glycan biosynthesis|hsa01100 Metabolic pathways|hsa04141 Protein processing in endoplasmic reticulum	Asparagine N-linked glycosylation (WP1785)|Proteasome degradation (WP183)|SARS-CoV-2 Infection (WP5021)|SRP-dependent cotranslational protein targeting to membrane (WP2737)	UP	-	-	-	-	-	P6	0.158523	0.622515	0.504712	0.0243799	0.572832	0.382061	0.648628	0.960014	0.513419	0.134322	0.153762	0.261397	0.543876	-0.144884	-0.785237	-0.345776	0.500803	0.129742	0.734977	0.138166	-0.459904	0.277534	1.3388	0.236214	1.40949	-0.790041	0.327588	0.312163	0.552553	0.867537	-0.420161	-0.524531	-0.0608382	-0.798021	0.161796	-0.17273
RRAGC	Ras related GTP binding C	apoptotic process (GO:0006915)|aromatic compound biosynthetic process (GO:0019438)|autophagy (GO:0006914)|biological regulation (GO:0065007)|biological_process (GO:0008150)|biosynthetic process (GO:0009058)|catabolic process (GO:0009056)|cell communication (GO:0007154)|cell cycle (GO:0007049)|cell cycle arrest (GO:0007050)|cell cycle process (GO:0022402)|cell death (GO:0008219)|cellular aromatic …	anion binding (GO:0043168)|binding (GO:0005488)|carbohydrate derivative binding (GO:0097367)|catalytic activity (GO:0003824)|cation binding (GO:0043169)|enzyme binding (GO:0019899)|GDP binding (GO:0019003)|GTP binding (GO:0005525)|GTPase activity (GO:0003924)|GTPase binding (GO:0051020)|guanyl nucleotide binding (GO:0019001)|guanyl ribonucleotide binding (GO:0032561)|heterocyclic compound binding…	bounding membrane of organelle (GO:0098588)|cellular anatomical entity (GO:0110165)|cellular_component (GO:0005575)|cytoplasm (GO:0005737)|cytoplasmic vesicle (GO:0031410)|cytosol (GO:0005829)|EGO complex (GO:0034448)|endomembrane system (GO:0012505)|endosome (GO:0005768)|Gtr1-Gtr2 GTPase complex (GO:1990131)|intracellular anatomical structure (GO:0005622)|intracellular membrane-bounded organelle…	hsa04140 Autophagy - animal|hsa04150 mTOR signaling pathway|hsa05131 Shigellosis	2q37 copy number variation syndrome (WP5224)|Amino acids regulate mTORC1 (WP5015)|Energy dependent regulation of mTOR by LKB1-AMPK (WP2748)|Macroautophagy (WP3348)|MTOR signaling (WP3318)|PTEN Regulation (WP4047)|Target of rapamycin (TOR) signaling (WP1471)|TP53 Regulates Metabolic Genes (WP3349)	UP	-	-	-	-	-	P6	0.469032	1.05858	0.471143	0.367826	0.44334	0.498368	0.0385682	0.0652488	0.794882	0.441226	-0.167804	-0.406656	-0.0963999	0.504435	0.695997	-0.513622	0.834583	0.387605	0.319	1.15795	0.509563	7.34091e-05	-0.116148	-0.718781	0.159901	0.35509	0.0729799	0.74291	0.485769	-0.333419	0.245032	0.645311	-0.195794	0.309975	-1.05737	-0.133596
SLC2A3	solute carrier family 2 member 3	anion transmembrane transport (GO:0098656)|anion transport (GO:0006820)|biological_process (GO:0008150)|carbohydrate import across plasma membrane (GO:0098704)|carbohydrate metabolic process (GO:0005975)|carbohydrate transmembrane transport (GO:0034219)|carbohydrate transport (GO:0008643)|carboxylic acid metabolic process (GO:0019752)|cell activation (GO:0001775)|cell activation involved in immun…	anion transmembrane transporter activity (GO:0008509)|binding (GO:0005488)|carbohydrate binding (GO:0030246)|carbohydrate transmembrane transporter activity (GO:0015144)|glucose binding (GO:0005536)|glucose transmembrane transporter activity (GO:0005355)|hexose transmembrane transporter activity (GO:0015149)|ion transmembrane transporter activity (GO:0015075)|molecular_function (GO:0003674)|monos…	bounding membrane of organelle (GO:0098588)|cell body (GO:0044297)|cell periphery (GO:0071944)|cell projection (GO:0042995)|cellular anatomical entity (GO:0110165)|cellular_component (GO:0005575)|cytoplasm (GO:0005737)|cytoplasmic vesicle (GO:0031410)|cytoplasmic vesicle membrane (GO:0030659)|endomembrane system (GO:0012505)|extracellular exosome (GO:0070062)|extracellular organelle (GO:0043230)|…		Cellular hexose transport (WP4043)|Focal adhesion: PI3K-Akt-mTOR-signaling pathway (WP3932)|Glycolysis and Gluconeogenesis - for workshop (WP4361)|Glycolysis and gluconeogenesis (WP534)|Metabolism of water-soluble vitamins and cofactors (WP1857)|Neuroinflammation and glutamatergic signaling (WP5083)|Neutrophil degranulation (WP4049)|NRF2 pathway (WP2884)|Nuclear receptors meta-pathway (WP2882)|Ph…	UP	-	-	-	-	-	P6	0.503536	0.955986	0.362334	0.215543	-0.0790386	0.0699703	0.524188	-0.0240472	0.501057	0.535411	0.531593	0.785435	0.170344	-0.41244	-0.890292	-0.409359	0.142267	0.389337	0.0549746	-0.106985	-0.412429	0.00275211	0.401791	0.691537	-0.303213	-0.484943	0.133528	0.314241	1.14483	0.345231	-0.598633	-0.0234099	-0.330692	-0.742564	0.47607	-0.746689
SNX30	sorting nexin family member 30	amide transport (GO:0042886)|anion transport (GO:0006820)|biological_process (GO:0008150)|establishment of localization (GO:0051234)|establishment of protein localization (GO:0045184)|ion transport (GO:0006811)|localization (GO:0051179)|macromolecule localization (GO:0033036)|nitrogen compound transport (GO:0071705)|organic substance transport (GO:0071702)|peptide transport (GO:0015833)|protein l…	binding (GO:0005488)|lipid binding (GO:0008289)|molecular_function (GO:0003674)|phosphatidylinositol binding (GO:0035091)|phospholipid binding (GO:0005543)|protein binding (GO:0005515)				UP	-	-	-	-	-	P6	0.426084	0.31652	-0.0167822	0.341199	0.172536	-0.10755	0.687082	0.954993	0.290842	0.755743	-0.367246	-0.726007	0.912531	0.239864	-0.344662	0.100146	0.523859	0.109978	0.0842722	0.418764	0.33209	0.402911	0.298908	1.07132	-0.246147	0.0291008	0.21914	0.198203	-0.157168	0.520008	-0.842978	-0.447799	-0.486882	0.128521	0.487583	-0.974609
STK17B	serine/threonine kinase 17b	apoptotic process (GO:0006915)|biological regulation (GO:0065007)|biological_process (GO:0008150)|cell communication (GO:0007154)|cell death (GO:0008219)|cellular macromolecule metabolic process (GO:0044260)|cellular metabolic process (GO:0044237)|cellular process (GO:0009987)|cellular protein metabolic process (GO:0044267)|cellular protein modification process (GO:0006464)|cellular response to s…	adenyl nucleotide binding (GO:0030554)|adenyl ribonucleotide binding (GO:0032559)|anion binding (GO:0043168)|ATP binding (GO:0005524)|binding (GO:0005488)|carbohydrate derivative binding (GO:0097367)|catalytic activity (GO:0003824)|catalytic activity, acting on a protein (GO:0140096)|heterocyclic compound binding (GO:1901363)|ion binding (GO:0043167)|kinase activity (GO:0016301)|molecular_functio…	actin cytoskeleton (GO:0015629)|cell periphery (GO:0071944)|cellular anatomical entity (GO:0110165)|cellular_component (GO:0005575)|cytoplasm (GO:0005737)|cytoskeleton (GO:0005856)|endoplasmic reticulum-Golgi intermediate compartment (GO:0005793)|intracellular anatomical structure (GO:0005622)|intracellular membrane-bounded organelle (GO:0043231)|intracellular non-membrane-bounded organelle (GO:0…			UP	-	-	-	-	-	P6	0.600936	0.574467	0.272845	0.145116	-0.124379	0.958247	0.552385	0.557642	0.783054	0.408728	0.728629	-0.316827	-0.335319	-0.193692	-0.584893	0.136578	0.263169	-0.725764	-0.0648761	-1.14559	0.905429	-0.331972	0.28349	0.816853	-1.33976	0.0692077	0.700843	0.253615	1.96974	0.629081	0.37305	-0.468161	1.30284	-0.567205	1.12077	0.219286
TGOLN2	trans-golgi network protein 2	biological_process (GO:0008150)|cellular component organization (GO:0016043)|cellular component organization or biogenesis (GO:0071840)|cellular macromolecule metabolic process (GO:0044260)|cellular metabolic process (GO:0044237)|cellular process (GO:0009987)|cellular protein metabolic process (GO:0044267)|cellular protein modification process (GO:0006464)|macromolecule metabolic process (GO:0043…	binding (GO:0005488)|molecular_function (GO:0003674)|protein binding (GO:0005515)	bounding membrane of organelle (GO:0098588)|cell periphery (GO:0071944)|cellular anatomical entity (GO:0110165)|cellular_component (GO:0005575)|clathrin-coated vesicle (GO:0030136)|clathrin-coated vesicle membrane (GO:0030665)|coated vesicle (GO:0030135)|coated vesicle membrane (GO:0030662)|cytoplasm (GO:0005737)|cytoplasmic vesicle (GO:0031410)|cytoplasmic vesicle membrane (GO:0030659)|endomembr…		Intra-Golgi and retrograde Golgi-to-ER traffic (WP3842)|Post-translational protein phosphorylation (WP4110)|Regulation of IGF transport and uptake by IGF binding proteins (WP2799)|trans-Golgi Network Vesicle Budding (WP3578)	UP	-	-	-	-	-	P6	0.355047	0.777307	0.173029	0.804991	0.777763	0.861643	-0.305913	0.678804	0.268397	0.0965403	0.0602698	0.266288	0.56976	-0.114433	0.383891	0.539309	0.336669	0.161939	0.380241	-0.660735	-0.777076	-0.227127	-0.175986	-1.09176	0.0811748	-0.137126	-0.00327689	0.435369	-0.26904	-0.37796	-1.08374	-0.104653	-0.189014	0.601217	-0.793844	-0.638023
TRIM16L	tripartite motif containing 16 like			cell periphery (GO:0071944)|cellular anatomical entity (GO:0110165)|cellular_component (GO:0005575)|cytoplasm (GO:0005737)|cytosol (GO:0005829)|intracellular anatomical structure (GO:0005622)|membrane (GO:0016020)|plasma membrane (GO:0005886)			UP	-	-	-	-	-	P6	1.06199	0.213111	0.558896	0.854496	1.35282	0.382986	1.04654	0.775239	0.875296	-0.195663	0.657495	-0.33092	0.851943	-0.0577676	0.633075	-0.529622	0.101753	-0.489725	-0.371357	0.523528	0.555378	0.120338	1.13626	0.884011	0.605036	0.434701	0.800346	-0.323331	1.97571	0.59614	0.451157	-0.487055	-0.139554	1.40686	-0.104981	-0.105062
TRIM35	tripartite motif containing 35	apoptotic process (GO:0006915)|biological process involved in interaction with host (GO:0051701)|biological process involved in interspecies interaction between organisms (GO:0044419)|biological process involved in symbiotic interaction (GO:0044403)|biological regulation (GO:0065007)|biological_process (GO:0008150)|cell cycle (GO:0007049)|cell death (GO:0008219)|cellular macromolecule metabolic p…	binding (GO:0005488)|catalytic activity (GO:0003824)|catalytic activity, acting on a protein (GO:0140096)|cation binding (GO:0043169)|ion binding (GO:0043167)|metal ion binding (GO:0046872)|molecular_function (GO:0003674)|transferase activity (GO:0016740)|transition metal ion binding (GO:0046914)|ubiquitin-like protein ligase activity (GO:0061659)|ubiquitin-like protein transferase activity (GO:0…	cellular anatomical entity (GO:0110165)|cellular_component (GO:0005575)|cytoplasm (GO:0005737)|intracellular anatomical structure (GO:0005622)|intracellular membrane-bounded organelle (GO:0043231)|intracellular organelle (GO:0043229)|membrane-bounded organelle (GO:0043227)|nucleus (GO:0005634)|organelle (GO:0043226)		Interactome of polycomb repressive complex 2 (PRC2) (WP2916)|Interferon gamma signaling (WP1836)	UP	-	-	-	-	-	P6	0.681816	0.510495	-0.159264	0.03286	0.51268	0.405974	-0.00663528	0.187897	0.27928	0.348478	0.445567	-0.0173142	-0.408311	-0.260527	0.590182	0.0675457	-0.190523	-0.666949	-0.139069	-1.95226	0.625224	-0.0121859	-0.0455272	0.336633	-0.12773	-0.637594	-0.0793763	0.169904	1.86715	0.603297	0.451734	-1.11717	0.625389	0.838944	-0.275774	0.0558619
VEGFB	vascular endothelial growth factor B	anatomical structure development (GO:0048856)|anatomical structure formation involved in morphogenesis (GO:0048646)|anatomical structure morphogenesis (GO:0009653)|angiogenesis (GO:0001525)|animal organ development (GO:0048513)|biological regulation (GO:0065007)|biological_process (GO:0008150)|biosynthetic process (GO:0009058)|blood circulation (GO:0008015)|blood vessel development (GO:0001568)|b…	binding (GO:0005488)|carbohydrate derivative binding (GO:0097367)|chemoattractant activity (GO:0042056)|cytokine receptor binding (GO:0005126)|glycosaminoglycan binding (GO:0005539)|growth factor activity (GO:0008083)|growth factor receptor binding (GO:0070851)|heparin binding (GO:0008201)|identical protein binding (GO:0042802)|molecular function regulator (GO:0098772)|molecular_function (GO:0003…	cellular anatomical entity (GO:0110165)|cellular_component (GO:0005575)|cytoplasm (GO:0005737)|cytoplasmic vesicle (GO:0031410)|cytoplasmic vesicle lumen (GO:0060205)|endomembrane system (GO:0012505)|extracellular region (GO:0005576)|extracellular space (GO:0005615)|intracellular anatomical structure (GO:0005622)|intracellular vesicle (GO:0097708)|membrane-bounded organelle (GO:0043227)|membrane-…	hsa04010 MAPK signaling pathway|hsa04014 Ras signaling pathway|hsa04015 Rap1 signaling pathway|hsa04020 Calcium signaling pathway|hsa04151 PI3K-Akt signaling pathway|hsa04510 Focal adhesion|hsa04926 Relaxin signaling pathway|hsa04933 AGE-RAGE signaling pathway in diabetic complications|hsa05200 Pathways in cancer	Focal adhesion (WP306)|Focal adhesion: PI3K-Akt-mTOR-signaling pathway (WP3932)|Heart development (WP1591)|Malignant pleural mesothelioma (WP5087)|MicroRNA for targeting cancer growth and vascularization in glioblastoma (WP3593)|PI3K-Akt signaling pathway (WP4172)|Polycystic kidney disease pathway (WP2571)|Role of immune system in pancreatic cancer (WP5078)|Signaling by VEGF (WP1919)	UP	-	-	-	-	-	P6	0.366915	0.271731	-0.0141271	0.357605	0.0922176	0.705786	0.12668	0.565659	0.800843	0.0809711	0.0729127	0.749797	0.911029	-0.0298209	0.0994457	1.52529	0.0273974	0.0704647	0.42413	-0.685395	-0.25674	-0.593077	0.555994	0.480956	0.0666516	0.386541	-0.324236	0.802008	0.233276	-0.17581	1.10714	0.172313	-0.516869	-0.510962	-0.287766	-0.13045
VPS26B	VPS26, retromer complex component B	amide transport (GO:0042886)|anion transport (GO:0006820)|autophagy (GO:0006914)|biological process involved in interspecies interaction between organisms (GO:0044419)|biological regulation (GO:0065007)|biological_process (GO:0008150)|catabolic process (GO:0009056)|cellular catabolic process (GO:0044248)|cellular localization (GO:0051641)|cellular macromolecule localization (GO:0070727)|cellular …	binding (GO:0005488)|molecular_function (GO:0003674)|protein binding (GO:0005515)	cellular anatomical entity (GO:0110165)|cellular_component (GO:0005575)|cytoplasm (GO:0005737)|cytoplasmic vesicle (GO:0031410)|cytosol (GO:0005829)|early endosome (GO:0005769)|endocytic vesicle (GO:0030139)|endomembrane system (GO:0012505)|endosome (GO:0005768)|intracellular anatomical structure (GO:0005622)|intracellular vesicle (GO:0097708)|late endosome (GO:0005770)|membrane-bounded organelle…	hsa04144 Endocytosis		UP	-	-	-	-	-	P6	-0.101333	0.0612633	0.949815	0.5754	0.341743	0.0803514	0.195525	0.474221	1.03139	0.955222	0.0974555	0.00517224	1.00315	0.422128	-0.399153	0.14552	-0.498364	0.280189	0.310346	0.41431	-0.169014	0.154513	-1.20287	0.527156	-0.294772	0.0579264	-0.268331	0.350773	0.663727	0.260914	0.296937	-0.715365	-0.0698942	-0.411256	0.0960468	-0.769169
ZBED5	zinc finger BED-type containing 5	aromatic compound biosynthetic process (GO:0019438)|biological regulation (GO:0065007)|biological_process (GO:0008150)|biosynthetic process (GO:0009058)|cellular aromatic compound metabolic process (GO:0006725)|cellular biosynthetic process (GO:0044249)|cellular macromolecule biosynthetic process (GO:0034645)|cellular macromolecule metabolic process (GO:0044260)|cellular metabolic process (GO:004…	binding (GO:0005488)|cation binding (GO:0043169)|DNA-binding transcription factor activity (GO:0003700)|DNA-binding transcription factor activity, RNA polymerase II-specific (GO:0000981)|DNA binding (GO:0003677)|heterocyclic compound binding (GO:1901363)|ion binding (GO:0043167)|metal ion binding (GO:0046872)|molecular_function (GO:0003674)|nucleic acid binding (GO:0003676)|organic cyclic compoun…	cellular anatomical entity (GO:0110165)|cellular_component (GO:0005575)|chromatin (GO:0000785)|chromosome (GO:0005694)|intracellular anatomical structure (GO:0005622)|intracellular non-membrane-bounded organelle (GO:0043232)|intracellular organelle (GO:0043229)|non-membrane-bounded organelle (GO:0043228)|organelle (GO:0043226)			UP	-	-	-	-	-	P6	0.394404	0.17343	0.741799	0.456838	0.506798	0.872621	-0.230139	-0.0222324	0.74284	0.210502	-1.00402	-0.00427322	-1.20134	-0.213557	-0.149694	-1.10038	0.217431	0.832319	-0.290409	0.587458	0.12521	0.827701	0.238332	1.5794	0.13942	-0.226106	0.425499	-0.127933	0.586464	-1.13387	0.942487	1.13938	-0.463818	0.598652	-0.449687	0.345434
ZNF30	zinc finger protein 30	aromatic compound biosynthetic process (GO:0019438)|biological regulation (GO:0065007)|biological_process (GO:0008150)|biosynthetic process (GO:0009058)|cellular aromatic compound metabolic process (GO:0006725)|cellular biosynthetic process (GO:0044249)|cellular macromolecule biosynthetic process (GO:0034645)|cellular macromolecule metabolic process (GO:0044260)|cellular metabolic process (GO:004…	binding (GO:0005488)|cation binding (GO:0043169)|cis-regulatory region sequence-specific DNA binding (GO:0000987)|DNA-binding transcription factor activity (GO:0003700)|DNA-binding transcription factor activity, RNA polymerase II-specific (GO:0000981)|DNA binding (GO:0003677)|double-stranded DNA binding (GO:0003690)|heterocyclic compound binding (GO:1901363)|ion binding (GO:0043167)|metal ion bin…	cellular anatomical entity (GO:0110165)|cellular_component (GO:0005575)|intracellular anatomical structure (GO:0005622)|intracellular membrane-bounded organelle (GO:0043231)|intracellular organelle (GO:0043229)|membrane-bounded organelle (GO:0043227)|nucleus (GO:0005634)|organelle (GO:0043226)	hsa05168 Herpes simplex virus 1 infection	Generic transcription pathway (WP1822)	UP	-	-	-	-	-	P6	0.306056	0.51715	0.220884	-0.0143215	0.97211	0.0176218	0.501376	0.672971	0.31357	0.041712	-0.430417	0.463691	0.0638382	0.873216	-0.561195	0.362438	0.0803318	-0.218773	-0.231768	0.0993488	0.144482	-0.305516	-0.126391	0.0817453	0.0524875	0.0228898	0.535228	-0.483735	-0.102408	-0.463766	0.226439	-0.100945	-0.238143	0.099729	-0.861753	-1.23957
ZNF337	zinc finger protein 337	aromatic compound biosynthetic process (GO:0019438)|biological regulation (GO:0065007)|biological_process (GO:0008150)|biosynthetic process (GO:0009058)|cellular aromatic compound metabolic process (GO:0006725)|cellular biosynthetic process (GO:0044249)|cellular macromolecule biosynthetic process (GO:0034645)|cellular macromolecule metabolic process (GO:0044260)|cellular metabolic process (GO:004…	binding (GO:0005488)|cation binding (GO:0043169)|DNA-binding transcription factor activity (GO:0003700)|DNA-binding transcription factor activity, RNA polymerase II-specific (GO:0000981)|DNA-binding transcription repressor activity (GO:0001217)|DNA-binding transcription repressor activity, RNA polymerase II-specific (GO:0001227)|DNA binding (GO:0003677)|double-stranded DNA binding (GO:0003690)|he…	cellular anatomical entity (GO:0110165)|cellular_component (GO:0005575)|intracellular anatomical structure (GO:0005622)|intracellular membrane-bounded organelle (GO:0043231)|intracellular organelle (GO:0043229)|membrane-bounded organelle (GO:0043227)|nucleus (GO:0005634)|organelle (GO:0043226)	hsa05168 Herpes simplex virus 1 infection	Generic transcription pathway (WP1822)	UP	-	-	-	-	-	P6	0.345427	0.264465	-0.0359554	0.893166	0.881918	0.449018	0.144949	0.388198	-0.0310425	0.304107	0.383279	-0.303857	0.579609	0.366642	-0.320116	-0.0747588	0.454851	0.129344	1.14347	-0.96022	0.0672175	0.124955	0.0561455	-0.644428	-0.359933	0.0330377	-0.16038	0.00906613	-0.745821	0.0896356	0.245025	-0.443112	-0.0370391	-0.428182	0.152572	-0.274205
ZNF682	zinc finger protein 682	aromatic compound biosynthetic process (GO:0019438)|biological regulation (GO:0065007)|biological_process (GO:0008150)|biosynthetic process (GO:0009058)|cellular aromatic compound metabolic process (GO:0006725)|cellular biosynthetic process (GO:0044249)|cellular macromolecule biosynthetic process (GO:0034645)|cellular macromolecule metabolic process (GO:0044260)|cellular metabolic process (GO:004…	binding (GO:0005488)|cation binding (GO:0043169)|cis-regulatory region sequence-specific DNA binding (GO:0000987)|DNA-binding transcription factor activity (GO:0003700)|DNA-binding transcription factor activity, RNA polymerase II-specific (GO:0000981)|DNA binding (GO:0003677)|double-stranded DNA binding (GO:0003690)|heterocyclic compound binding (GO:1901363)|ion binding (GO:0043167)|metal ion bin…	cellular anatomical entity (GO:0110165)|cellular_component (GO:0005575)|intracellular anatomical structure (GO:0005622)|intracellular membrane-bounded organelle (GO:0043231)|intracellular organelle (GO:0043229)|membrane-bounded organelle (GO:0043227)|nucleus (GO:0005634)|organelle (GO:0043226)	hsa05168 Herpes simplex virus 1 infection	Generic transcription pathway (WP1822)	UP	-	-	-	-	-	P6	0.80442	0.367376	0.852069	0.476509	0.148602	0.0482565	0.627911	-0.181221	0.761659	0.542463	-0.400022	0.546288	-0.0802437	-0.446252	-0.123495	0.362372	-0.257982	0.430749	-0.547354	0.920781	-0.456769	-0.786379	0.169254	0.18346	-0.497041	-0.609718	-0.429773	-0.460573	0.185245	0.163171	0.851104	-0.200798	0.22402	-0.679629	0.486875	0.0814821
AKR1A1	aldo-keto reductase family 1 member A1	alcohol metabolic process (GO:0006066)|aldehyde catabolic process (GO:0046185)|aminoglycoside antibiotic metabolic process (GO:0030647)|biological_process (GO:0008150)|biosynthetic process (GO:0009058)|carbohydrate biosynthetic process (GO:0016051)|carbohydrate derivative biosynthetic process (GO:1901137)|carbohydrate derivative metabolic process (GO:1901135)|carbohydrate metabolic process (GO:00…	alcohol dehydrogenase (NADP+) activity (GO:0008106)|alditol:NADP+ 1-oxidoreductase activity (GO:0004032)|aldo-keto reductase (NADP) activity (GO:0004033)|allyl-alcohol dehydrogenase activity (GO:0047655)|binding (GO:0005488)|catalytic activity (GO:0003824)|electron transfer activity (GO:0009055)|glucuronolactone reductase activity (GO:0047941)|L-glucuronate reductase activity (GO:0047939)|molecul…	apical part of cell (GO:0045177)|apical plasma membrane (GO:0016324)|cell junction (GO:0030054)|cell periphery (GO:0071944)|cellular anatomical entity (GO:0110165)|cellular_component (GO:0005575)|cytoplasm (GO:0005737)|cytosol (GO:0005829)|extracellular exosome (GO:0070062)|extracellular organelle (GO:0043230)|extracellular region (GO:0005576)|extracellular space (GO:0005615)|extracellular vesicl…	hsa00010 Glycolysis / Gluconeogenesis|hsa00040 Pentose and glucuronate interconversions|hsa00053 Ascorbate and aldarate metabolism|hsa00561 Glycerolipid metabolism|hsa00620 Pyruvate metabolism|hsa01100 Metabolic pathways|hsa01240 Biosynthesis of cofactors	Benzo(a)pyrene metabolism (WP696)|Formation of xylulose-5-phosphate (WP4068)|Metapathway biotransformation Phase I and II (WP702)|Phase II - Conjugation of compounds (WP4111)	-	-	UP	-	-	-	P7	0.177884	0.159741	0.305366	0.186936	0.285638	0.0497448	-0.138674	-0.0751503	0.384187	0.154713	0.556419	0.518857	0.469137	0.205629	0.603807	0.0538807	1.03587	0.402184	0.406469	0.526167	-0.139876	-0.0601147	-0.459065	0.533435	0.541384	0.0898399	-0.22184	-0.509692	-0.623819	-0.179758	-0.28099	-0.0682568	-0.407477	-0.375384	0.500083	-0.349045
ARL1	ADP ribosylation factor like GTPase 1	activation of phospholipase D activity (GO:0031584)|amide transport (GO:0042886)|anion transport (GO:0006820)|biological regulation (GO:0065007)|biological_process (GO:0008150)|cellular component organization (GO:0016043)|cellular component organization or biogenesis (GO:0071840)|cellular localization (GO:0051641)|cellular macromolecule localization (GO:0070727)|cellular metabolic process (GO:004…	anion binding (GO:0043168)|binding (GO:0005488)|carbohydrate derivative binding (GO:0097367)|catalytic activity (GO:0003824)|cation binding (GO:0043169)|enzyme activator activity (GO:0008047)|enzyme regulator activity (GO:0030234)|GTP binding (GO:0005525)|GTPase activity (GO:0003924)|guanyl nucleotide binding (GO:0019001)|guanyl ribonucleotide binding (GO:0032561)|heterocyclic compound binding (G…	bounding membrane of organelle (GO:0098588)|cellular anatomical entity (GO:0110165)|cellular_component (GO:0005575)|cytoplasm (GO:0005737)|cytosol (GO:0005829)|endomembrane system (GO:0012505)|Golgi apparatus (GO:0005794)|Golgi apparatus subcompartment (GO:0098791)|Golgi membrane (GO:0000139)|intracellular anatomical structure (GO:0005622)|intracellular membrane-bounded organelle (GO:0043231)|int…		Intra-Golgi and retrograde Golgi-to-ER traffic (WP3842)	-	-	UP	-	-	-	P7	0.460701	-0.0849976	-0.178153	0.186175	-0.131441	0.453843	-0.141242	-0.15234	0.416451	0.022257	0.512728	0.518295	0.498232	0.372796	0.53148	0.667659	0.259516	0.0409441	0.199044	0.354529	-0.152578	0.166513	0.37572	0.0999577	0.328129	0.190162	0.0724884	0.0493489	0.152936	0.124145	-0.0488971	-0.0683684	-0.478766	-0.248218	0.0561168	-0.294179
PRR13	proline rich 13		binding (GO:0005488)|molecular_function (GO:0003674)|protein binding (GO:0005515)	cellular anatomical entity (GO:0110165)|cellular_component (GO:0005575)|cytoplasm (GO:0005737)|cytosol (GO:0005829)|intracellular anatomical structure (GO:0005622)|intracellular membrane-bounded organelle (GO:0043231)|intracellular organelle (GO:0043229)|intracellular organelle lumen (GO:0070013)|membrane-bounded organelle (GO:0043227)|membrane-enclosed lumen (GO:0031974)|nuclear lumen (GO:003198…			-	-	UP	-	-	-	P7	-0.0563301	0.127827	-0.06001	-0.717504	-0.0647883	0.101615	0.330496	-0.592413	-0.225427	-0.175545	0.188362	0.435961	0.567054	0.37899	-0.0614677	0.405691	0.626194	-0.00499588	0.313926	0.322694	0.128269	0.131439	0.0687685	0.118794	-0.464365	0.199218	0.0611241	-0.0986979	0.343251	-0.0778078	-1.09271	-1.04521	-0.320063	-0.34043	-0.769336	-0.141615
SLC41A1	solute carrier family 41 member 1	biological regulation (GO:0065007)|biological_process (GO:0008150)|cation homeostasis (GO:0055080)|cation transmembrane transport (GO:0098655)|cation transport (GO:0006812)|cellular cation homeostasis (GO:0030003)|cellular chemical homeostasis (GO:0055082)|cellular divalent inorganic cation homeostasis (GO:0072503)|cellular homeostasis (GO:0019725)|cellular ion homeostasis (GO:0006873)|cellular m…	active ion transmembrane transporter activity (GO:0022853)|active transmembrane transporter activity (GO:0022804)|antiporter activity (GO:0015297)|binding (GO:0005488)|cation transmembrane transporter activity (GO:0008324)|cation:cation antiporter activity (GO:0015491)|inorganic cation transmembrane transporter activity (GO:0022890)|inorganic molecular entity transmembrane transporter activity (G…	basal part of cell (GO:0045178)|basal plasma membrane (GO:0009925)|basolateral plasma membrane (GO:0016323)|cell periphery (GO:0071944)|cellular anatomical entity (GO:0110165)|cellular_component (GO:0005575)|integral component of membrane (GO:0016021)|intrinsic component of membrane (GO:0031224)|membrane (GO:0016020)|plasma membrane (GO:0005886)|plasma membrane region (GO:0098590)|protein-contain…		Transport of bile salts and organic acids, metal ions and amine compounds (WP1935)	-	-	UP	-	-	-	P7	-0.203553	0.140043	-0.36745	0.15859	-0.257897	0.204084	-0.786971	-0.183359	-0.278463	-0.17077	0.29365	0.57374	0.423827	0.665293	0.0482801	0.0759113	0.833517	0.284376	0.73439	0.846136	-0.5209	0.432012	-0.526585	0.771579	0.603937	-0.494737	1.22856	0.156187	-0.586934	-0.100639	-0.110454	0.298229	-0.583692	0.345948	0.503919	0.971471
SYNPO	synaptopodin	actin cytoskeleton organization (GO:0030036)|actin filament-based process (GO:0030029)|actin filament bundle assembly (GO:0051017)|actin filament bundle organization (GO:0061572)|actin filament organization (GO:0007015)|biological regulation (GO:0065007)|biological_process (GO:0008150)|cell junction organization (GO:0034330)|cellular component assembly (GO:0022607)|cellular component biogenesis (…	actin binding (GO:0003779)|binding (GO:0005488)|cytoskeletal protein binding (GO:0008092)|molecular_function (GO:0003674)|protein binding (GO:0005515)	actin cytoskeleton (GO:0015629)|actin filament bundle (GO:0032432)|actomyosin (GO:0042641)|anchoring junction (GO:0070161)|apical junction complex (GO:0043296)|asymmetric synapse (GO:0032279)|bicellular tight junction (GO:0005923)|cell-cell junction (GO:0005911)|cell body (GO:0044297)|cell junction (GO:0030054)|cell projection (GO:0042995)|cellular anatomical entity (GO:0110165)|cellular_componen…	hsa04530 Tight junction	Nephrotic syndrome (WP4758)|PodNet: protein-protein interactions in the podocyte (WP4755)|Primary focal segmental glomerulosclerosis (FSGS) (WP2572)	-	-	UP	-	-	-	P7	0.598902	0.615589	-0.0368131	0.0736558	-0.155875	-1.18075	-0.790635	-0.728039	0.157997	-0.215134	0.317518	-0.0641797	0.192271	0.928145	0.529581	0.750917	0.607203	0.837375	0.645142	0.0802765	0.0280699	-0.0566288	0.437986	0.236223	1.25105	-0.471618	0.832446	1.20955	0.00607667	-0.0832301	0.0626921	0.515435	0.0929164	-0.755889	0.65322	0.896824
SYT14	synaptotagmin 14			cellular anatomical entity (GO:0110165)|cellular_component (GO:0005575)|integral component of membrane (GO:0016021)|intrinsic component of membrane (GO:0031224)|membrane (GO:0016020)			-	-	UP	-	-	-	P7	0.578283	-0.446406	-0.655554	0.0810884	0.730461	-0.528699	0.304579	-0.599138	0.18419	0.643724	1.00605	0.363893	0.727753	0.389005	0.821908	0.0464546	0.0102605	0.762656	0.313418	0.850561	0.563248	0.65722	-0.107332	0.1119	-0.255523	-0.339155	0.582181	0.00518321	-0.222148	0.142017	-0.555819	-0.449076	0.204244	0.52172	-0.275723	-0.148728
ZNF106	zinc finger protein 106	biological regulation (GO:0065007)|biological_process (GO:0008150)|cell communication (GO:0007154)|cell surface receptor signaling pathway (GO:0007166)|cellular process (GO:0009987)|cellular response to chemical stimulus (GO:0070887)|cellular response to endogenous stimulus (GO:0071495)|cellular response to hormone stimulus (GO:0032870)|cellular response to insulin stimulus (GO:0032869)|cellular …	binding (GO:0005488)|cation binding (GO:0043169)|heterocyclic compound binding (GO:1901363)|ion binding (GO:0043167)|metal ion binding (GO:0046872)|molecular_function (GO:0003674)|nucleic acid binding (GO:0003676)|organic cyclic compound binding (GO:0097159)|protein binding (GO:0005515)|protein domain specific binding (GO:0019904)|RNA binding (GO:0003723)|SH3 domain binding (GO:0017124)	cellular anatomical entity (GO:0110165)|cellular_component (GO:0005575)|cytoplasm (GO:0005737)|cytosol (GO:0005829)|intracellular anatomical structure (GO:0005622)|intracellular membrane-bounded organelle (GO:0043231)|intracellular non-membrane-bounded organelle (GO:0043232)|intracellular organelle (GO:0043229)|intracellular organelle lumen (GO:0070013)|membrane-bounded organelle (GO:0043227)|mem…			-	-	UP	-	-	-	P7	-0.171773	-0.405769	-0.0446559	0.207481	0.0490385	1.07753	-0.767249	0.595087	-0.0709141	0.298638	0.200247	0.220976	0.797895	0.119034	0.780182	0.401336	0.321236	0.272072	0.272852	0.282552	-0.284174	0.685675	-0.695124	0.385543	-1.09932	0.89635	-0.22983	-0.82098	-0.490743	-0.192283	0.00625668	0.0235529	0.0133433	-0.468639	-0.772486	-1.32892
EXOSC8	exosome component 8	aromatic compound catabolic process (GO:0019439)|biological regulation (GO:0065007)|biological_process (GO:0008150)|catabolic process (GO:0009056)|cellular aromatic compound metabolic process (GO:0006725)|cellular catabolic process (GO:0044248)|cellular component biogenesis (GO:0044085)|cellular component organization or biogenesis (GO:0071840)|cellular macromolecule catabolic process (GO:0044265…	binding (GO:0005488)|heterocyclic compound binding (GO:1901363)|identical protein binding (GO:0042802)|molecular_function (GO:0003674)|mRNA 3'-UTR AU-rich region binding (GO:0035925)|mRNA 3'-UTR binding (GO:0003730)|mRNA binding (GO:0003729)|nucleic acid binding (GO:0003676)|organic cyclic compound binding (GO:0097159)|protein binding (GO:0005515)|RNA binding (GO:0003723)	catalytic complex (GO:1902494)|cellular anatomical entity (GO:0110165)|cellular_component (GO:0005575)|chromosome (GO:0005694)|cytoplasm (GO:0005737)|cytoplasmic exosome (RNase complex) (GO:0000177)|cytosol (GO:0005829)|exoribonuclease complex (GO:1905354)|exosome (RNase complex) (GO:0000178)|fibrillar center (GO:0001650)|intracellular anatomical structure (GO:0005622)|intracellular membrane-boun…	hsa03018 RNA degradation	ATF4 activates genes in response to endoplasmic reticulum stress (WP2753)|Deadenylation-dependent mRNA decay (WP2659)|Major pathway of rRNA processing in the nucleolus and cytosol (WP3797)|Regulation of mRNA stability by proteins that bind AU-rich elements (WP2733)	-	DOWN	-	-	-	-	P7	0.227705	0.23023	-0.442026	0.280826	-0.0892984	-0.191642	-0.110081	-0.0356893	0.376458	0.220861	0.140679	-0.0545954	0.30028	-0.565149	0.512802	0.208183	-0.0709614	0.362827	1.3643	0.367663	-0.0157199	-0.839212	0.0745976	0.701126	-0.765001	0.4153	0.149536	0.534431	0.245274	-0.630816	-0.324038	-0.559012	-0.834797	-0.590183	-0.405018	-0.772636
ASAH1	N-acylsphingosine amidohydrolase 1	alcohol biosynthetic process (GO:0046165)|alcohol metabolic process (GO:0006066)|amide biosynthetic process (GO:0043604)|anatomical structure development (GO:0048856)|animal organ development (GO:0048513)|biological regulation (GO:0065007)|biological_process (GO:0008150)|biosynthetic process (GO:0009058)|carbohydrate derivative metabolic process (GO:1901135)|carboxylic acid metabolic process (GO:…	catalytic activity (GO:0003824)|ceramidase activity (GO:0102121)|fatty acid amide hydrolase activity (GO:0017064)|hydrolase activity (GO:0016787)|hydrolase activity, acting on carbon-nitrogen (but not peptide) bonds (GO:0016810)|hydrolase activity, acting on carbon-nitrogen (but not peptide) bonds, in linear amides (GO:0016811)|molecular_function (GO:0003674)|N-acylsphingosine amidohydrolase acti…	cellular anatomical entity (GO:0110165)|cellular_component (GO:0005575)|cytoplasm (GO:0005737)|cytoplasmic vesicle (GO:0031410)|endomembrane system (GO:0012505)|extracellular exosome (GO:0070062)|extracellular organelle (GO:0043230)|extracellular region (GO:0005576)|extracellular space (GO:0005615)|extracellular vesicle (GO:1903561)|ficolin-1-rich granule (GO:0101002)|ficolin-1-rich granule lumen…	hsa00600 Sphingolipid metabolism|hsa01100 Metabolic pathways|hsa04071 Sphingolipid signaling pathway|hsa04142 Lysosome	Biosynthesis and turnover of 1-deoxy-sphingoid bases (WP5179)|Neutrophil degranulation (WP4049)|S1P receptor signal transduction (WP26)|Sphingolipid metabolism (WP2788)|Sphingolipid metabolism in senescence (WP5121)|Sphingolipid metabolism overview (WP4725)|Sphingolipid metabolism: integrated pathway (WP4726)|Sphingolipid pathway (WP1422)|Synthesis of ceramides and 1-deoxyceramides (WP5194)|test …	UP	-	-	-	-	-	P8	0.259535	0.418887	0.820671	0.38836	1.14641	0.757349	0.444676	0.122926	0.0865104	0.524862	-0.43768	0.400619	0.391063	0.33809	0.623504	0.31042	0.326625	-0.151551	0.620408	0.232264	-0.173933	0.16665	-0.125091	0.272874	0.254913	0.302964	1.0802	0.574982	0.360211	-0.226434	0.167078	0.510024	-0.777718	-0.227774	0.49727	-0.0982327
CTSD	cathepsin D	antigen processing and presentation (GO:0019882)|antigen processing and presentation of exogenous antigen (GO:0019884)|antigen processing and presentation of exogenous peptide antigen (GO:0002478)|antigen processing and presentation of exogenous peptide antigen via MHC class II (GO:0019886)|antigen processing and presentation of peptide antigen (GO:0048002)|antigen processing and presentation of …	aspartic-type endopeptidase activity (GO:0004190)|aspartic-type peptidase activity (GO:0070001)|binding (GO:0005488)|catalytic activity (GO:0003824)|catalytic activity, acting on a protein (GO:0140096)|endopeptidase activity (GO:0004175)|hydrolase activity (GO:0016787)|molecular_function (GO:0003674)|peptidase activity (GO:0008233)|protein binding (GO:0005515)	bounding membrane of organelle (GO:0098588)|cell periphery (GO:0071944)|cellular anatomical entity (GO:0110165)|cellular_component (GO:0005575)|collagen-containing extracellular matrix (GO:0062023)|cytoplasm (GO:0005737)|cytoplasmic vesicle (GO:0031410)|cytoplasmic vesicle lumen (GO:0060205)|endomembrane system (GO:0012505)|endosome (GO:0005768)|endosome membrane (GO:0010008)|external encapsulati…	hsa04071 Sphingolipid signaling pathway|hsa04140 Autophagy - animal|hsa04142 Lysosome|hsa04210 Apoptosis|hsa04915 Estrogen signaling pathway|hsa05152 Tuberculosis	Collagen degradation (WP2708)|Conversion of angiotensinogen to angiotensin II (WP4818)|ESR-mediated signaling (WP4432)|Metabolism of angiotensinogen to angiotensins (WP2729)|MHC class II antigen presentation (WP2679)|Network map of SARS-CoV-2 signaling pathway (WP5115)|Neutrophil degranulation (WP4049)|Prolactin signaling pathway (WP2037)	UP	-	-	-	-	-	P8	0.259549	0.444268	1.25684	0.419345	0.179577	0.957505	0.287373	0.361735	1.01635	-0.0486578	-0.805387	0.375964	0.461998	-0.199472	0.707194	0.377447	1.2262	0.496179	0.171893	0.549844	1.51192	1.8789	-0.921124	0.299648	0.876382	-0.601036	-0.0203921	0.131515	0.212561	-0.520384	1.46068	0.696007	0.220961	-0.33834	0.170686	1.03707
EDIL3	EGF like repeats and discoidin domains 3	anatomical structure development (GO:0048856)|biological adhesion (GO:0022610)|biological regulation (GO:0065007)|biological_process (GO:0008150)|cell-substrate adhesion (GO:0031589)|cell adhesion (GO:0007155)|cellular process (GO:0009987)|developmental process (GO:0032502)|multicellular organism development (GO:0007275)|multicellular organismal process (GO:0032501)|positive regulation of biologi…	binding (GO:0005488)|calcium ion binding (GO:0005509)|cation binding (GO:0043169)|cell adhesion molecule binding (GO:0050839)|extracellular matrix structural constituent (GO:0005201)|integrin binding (GO:0005178)|ion binding (GO:0043167)|metal ion binding (GO:0046872)|molecular_function (GO:0003674)|protein-containing complex binding (GO:0044877)|protein binding (GO:0005515)|signaling receptor bi…	cell periphery (GO:0071944)|cellular anatomical entity (GO:0110165)|cellular_component (GO:0005575)|collagen-containing extracellular matrix (GO:0062023)|external encapsulating structure (GO:0030312)|extracellular exosome (GO:0070062)|extracellular matrix (GO:0031012)|extracellular organelle (GO:0043230)|extracellular region (GO:0005576)|extracellular space (GO:0005615)|extracellular vesicle (GO:…			DOWN	-	-	-	-	-	P8	-0.0457233	-0.647426	-0.740281	-0.702391	-0.107836	0.0403458	-1.09196	-0.232637	-0.541578	-0.289006	-0.498898	-0.701547	1.10614	0.659976	-0.0160314	-0.190439	-0.0105061	-0.954209	0.0190695	0.928908	-0.302422	0.0806101	-0.589636	-0.866044	-0.574607	0.0215235	-0.321106	0.478826	0.365655	-0.581483	1.18886	0.236466	-0.684208	-0.182149	-0.791421	-0.236282
FAM200B	family with sequence similarity 200 member B						UP	-	-	-	-	-	P8	0.161224	0.662204	0.544731	0.493749	0.5605	0.161204	0.248005	0.229856	0.106039	-0.246987	-0.0940095	-0.529101	0.389439	0.10313	0.291917	0.391842	0.750769	0.318516	-0.333231	-0.0394474	0.545109	-0.11447	-0.173982	0.40044	0.421583	-0.266989	0.377353	-0.183019	0.0628354	-0.332051	1.55656	-0.467123	0.283949	0.476002	-0.225041	0.73566
GARS1	glycyl-tRNA synthetase 1	amide biosynthetic process (GO:0043604)|amino acid activation (GO:0043038)|aromatic compound biosynthetic process (GO:0019438)|biological_process (GO:0008150)|biosynthetic process (GO:0009058)|carboxylic acid metabolic process (GO:0019752)|cellular amide metabolic process (GO:0043603)|cellular amino acid metabolic process (GO:0006520)|cellular aromatic compound metabolic process (GO:0006725)|cell…	adenyl nucleotide binding (GO:0030554)|adenyl ribonucleotide binding (GO:0032559)|aminoacyl-tRNA ligase activity (GO:0004812)|anion binding (GO:0043168)|ATP binding (GO:0005524)|binding (GO:0005488)|bis(5'-nucleosyl)-tetraphosphatase (asymmetrical) activity (GO:0004081)|bis(5'-nucleosyl)-tetraphosphatase activity (GO:0008796)|carbohydrate derivative binding (GO:0097367)|catalytic activity (GO:000…	axon (GO:0030424)|cell projection (GO:0042995)|cellular anatomical entity (GO:0110165)|cellular_component (GO:0005575)|cytoplasm (GO:0005737)|cytosol (GO:0005829)|extracellular exosome (GO:0070062)|extracellular organelle (GO:0043230)|extracellular region (GO:0005576)|extracellular space (GO:0005615)|extracellular vesicle (GO:1903561)|intracellular anatomical structure (GO:0005622)|intracellular …	hsa00970 Aminoacyl-tRNA biosynthesis	tRNA aminoacylation (WP1938)	UP	-	-	-	-	-	P8	0.770921	0.0659379	0.894741	-0.269677	0.339779	0.493123	0.58125	0.323798	1.02772	0.00907048	-0.00269803	-0.419688	-0.273403	0.217753	0.708245	0.851706	-0.0955284	0.178548	0.862129	0.649036	0.220629	0.82151	-0.470402	0.393457	0.167819	0.234683	0.751992	0.11126	1.12625	0.44803	0.751548	-0.449246	0.259196	0.466387	-0.279287	0.220436
SNHG18	small nucleolar RNA host gene 18						UP	-	-	-	-	-	P8	0.337312	0.673696	0.578142	0.335629	-0.0702502	0.0382141	0.757178	0.371508	0.547858	0.110131	0.0346043	0.787165	0.414539	0.464363	-0.0197106	0.750203	0.354697	0.00559841	-0.304475	-0.322335	0.35496	-0.55687	0.519696	0.11956	0.118452	0.0198986	0.50389	0.00770998	0.54095	-0.0265464	0.872525	0.149218	0.141527	-0.193772	-0.2587	-0.756547
POP7	POP7 homolog, ribonuclease P/MRP subunit	biological_process (GO:0008150)|cellular aromatic compound metabolic process (GO:0006725)|cellular component biogenesis (GO:0044085)|cellular component organization or biogenesis (GO:0071840)|cellular metabolic process (GO:0044237)|cellular nitrogen compound metabolic process (GO:0034641)|cellular process (GO:0009987)|gene expression (GO:0010467)|heterocycle metabolic process (GO:0046483)|macromo…	binding (GO:0005488)|catalytic activity (GO:0003824)|catalytic activity, acting on a tRNA (GO:0140101)|catalytic activity, acting on RNA (GO:0140098)|endonuclease activity (GO:0004519)|endonuclease activity, active with either ribo- or deoxyribonucleic acids and producing 5'-phosphomonoesters (GO:0016893)|endoribonuclease activity (GO:0004521)|endoribonuclease activity, producing 5'-phosphomonoes…	catalytic complex (GO:1902494)|cellular anatomical entity (GO:0110165)|cellular_component (GO:0005575)|cytoplasm (GO:0005737)|endoribonuclease complex (GO:1902555)|intracellular anatomical structure (GO:0005622)|intracellular membrane-bounded organelle (GO:0043231)|intracellular non-membrane-bounded organelle (GO:0043232)|intracellular organelle (GO:0043229)|intracellular organelle lumen (GO:0070…	hsa03008 Ribosome biogenesis in eukaryotes	tRNA processing in the nucleus (WP3552)	-	-	-	UP	-	UP	P8	-0.494207	-0.0623343	0.829513	-0.774557	-0.628538	0.245172	-0.357918	0.522785	-0.274278	0.45206	-0.556462	-0.238999	-0.876439	-0.446661	0.628143	-0.324193	0.937537	-0.283466	-0.488525	-0.235467	0.296351	0.647919	0.124617	-0.30312	-0.135744	0.257739	-0.551132	0.89352	-0.155189	-0.00286899	0.326697	-0.216103	2.0895	0.572729	-0.295916	-0.0869422
SLC38A1	solute carrier family 38 member 1	amino acid transmembrane transport (GO:0003333)|amino acid transport (GO:0006865)|anion transmembrane transport (GO:0098656)|anion transport (GO:0006820)|biological regulation (GO:0065007)|biological_process (GO:0008150)|carboxylic acid transmembrane transport (GO:1905039)|carboxylic acid transport (GO:0046942)|cation transport (GO:0006812)|cellular process (GO:0009987)|circulatory system process…	active ion transmembrane transporter activity (GO:0022853)|active transmembrane transporter activity (GO:0022804)|amino acid transmembrane transporter activity (GO:0015171)|amino acid:cation symporter activity (GO:0005416)|amino acid:sodium symporter activity (GO:0005283)|anion transmembrane transporter activity (GO:0008509)|binding (GO:0005488)|carboxylic acid transmembrane transporter activity …	apical part of cell (GO:0045177)|apical plasma membrane (GO:0016324)|basal part of cell (GO:0045178)|basal plasma membrane (GO:0009925)|basolateral plasma membrane (GO:0016323)|cell body (GO:0044297)|cell periphery (GO:0071944)|cell surface (GO:0009986)|cellular anatomical entity (GO:0110165)|cellular_component (GO:0005575)|external side of apical plasma membrane (GO:0098591)|external side of pla…	hsa04724 Glutamatergic synapse|hsa04727 GABAergic synapse	Ferroptosis (WP4313)|miR-targeted genes in epithelium (WP2002)|miR-targeted genes in lymphocytes (WP2004)|miR-targeted genes in muscle cell (WP2005)|miR-targeted genes in squamous cell (WP2006)|Neuroinflammation and glutamatergic signaling (WP5083)|Neurotransmitter uptake and metabolism In glial cells (WP1872)|Synaptic vesicle pathway (WP2267)|Transport of inorganic cations/anions and amino acids…	-	-	-	UP	-	-	P8	-0.323445	0.550559	-0.184917	0.224986	0.737797	0.0641681	0.192751	0.143017	0.774889	1.33222	0.44598	0.30261	1.01611	0.196629	0.38226	1.54154	-0.479569	-0.518384	1.56514	0.408672	-0.101599	1.44689	0.828514	-0.111398	-0.850452	0.0388967	0.71873	1.1493	0.426537	0.594511	1.4487	0.224946	1.24599	0.797663	0.992274	0.768498
ABRAXAS1	abraxas 1, BRCA1 A complex subunit	attachment of spindle microtubules to kinetochore (GO:0008608)|biological regulation (GO:0065007)|biological_process (GO:0008150)|cell communication (GO:0007154)|cell cycle (GO:0007049)|cell cycle checkpoint (GO:0000075)|cell cycle G2/M phase transition (GO:0044839)|cell cycle phase transition (GO:0044770)|cell cycle process (GO:0022402)|cellular aromatic compound metabolic process (GO:0006725)|c…	binding (GO:0005488)|cytoskeletal protein binding (GO:0008092)|microtubule binding (GO:0008017)|modification-dependent protein binding (GO:0140030)|molecular_function (GO:0003674)|polyubiquitin modification-dependent protein binding (GO:0031593)|protein binding (GO:0005515)|tubulin binding (GO:0015631)	BRCA1-A complex (GO:0070531)|cellular anatomical entity (GO:0110165)|cellular_component (GO:0005575)|intracellular anatomical structure (GO:0005622)|intracellular membrane-bounded organelle (GO:0043231)|intracellular organelle (GO:0043229)|intracellular organelle lumen (GO:0070013)|membrane-bounded organelle (GO:0043227)|membrane-enclosed lumen (GO:0031974)|nuclear body (GO:0016604)|nuclear lumen…	hsa03440 Homologous recombination	Cell cycle checkpoints (WP1775)|Deubiquitination (WP4102)|DNA Double Strand Break Response (WP3543)|DNA IR-damage and cellular response via ATR (WP4016)|HDR through Homologous Recombination (HRR) or Single Strand Annealing (SSA) (WP3567)|Homologous recombination (WP5096)|Nonhomologous End-Joining (NHEJ) (WP3550)	-	-	-	-	-	UP	P8	0.70972	0.228168	0.141783	-0.546169	0.00483632	0.413685	0.624925	0.242713	0.0797947	0.0525009	-0.553737	-0.188435	-0.275004	0.428831	0.461767	0.354178	0.00044968	-0.0109722	-0.0213056	0.250107	0.202279	-1.26277	0.607331	0.036634	0.577048	0.206355	-0.151631	-0.159376	-0.154326	-0.534748	-0.157604	0.467606	0.199575	0.24889	-0.0189876	-0.26462
C10orf88	chromosome 10 open reading frame 88		ATPase activity (GO:0016887)|binding (GO:0005488)|catalytic activity (GO:0003824)|hydrolase activity (GO:0016787)|hydrolase activity, acting on acid anhydrides (GO:0016817)|hydrolase activity, acting on acid anhydrides, in phosphorus-containing anhydrides (GO:0016818)|identical protein binding (GO:0042802)|molecular_function (GO:0003674)|nucleoside-triphosphatase activity (GO:0017111)|protein bin…	cellular anatomical entity (GO:0110165)|cellular_component (GO:0005575)|cytoplasm (GO:0005737)|intracellular anatomical structure (GO:0005622)|intracellular membrane-bounded organelle (GO:0043231)|intracellular organelle (GO:0043229)|membrane-bounded organelle (GO:0043227)|mitochondrion (GO:0005739)|organelle (GO:0043226)			-	-	-	-	-	UP	P8	0.0456836	0.246446	0.511361	-0.454865	0.0897062	-0.530614	0.330976	-0.429196	0.57824	0.288541	0.180832	-0.157937	-0.64599	0.254307	-0.550701	0.3662	0.0401398	-0.329858	-0.532171	0.411775	-0.148079	0.430569	0.178248	0.0932429	-0.415274	0.0255073	0.331864	-0.312148	0.0385212	-1.2756	0.498239	-0.151045	-0.108987	-0.236554	0.117329	-0.195607
CDH7	cadherin 7	adherens junction organization (GO:0034332)|anatomical structure development (GO:0048856)|anatomical structure morphogenesis (GO:0009653)|biological adhesion (GO:0022610)|biological_process (GO:0008150)|calcium-dependent cell-cell adhesion via plasma membrane cell adhesion molecules (GO:0016339)|cell-cell adhesion (GO:0098609)|cell-cell adhesion via plasma-membrane adhesion molecules (GO:0098742)…	binding (GO:0005488)|cadherin binding (GO:0045296)|calcium ion binding (GO:0005509)|cation binding (GO:0043169)|cell adhesion molecule binding (GO:0050839)|ion binding (GO:0043167)|metal ion binding (GO:0046872)|molecular_function (GO:0003674)|protein binding (GO:0005515)	adherens junction (GO:0005912)|anchoring junction (GO:0070161)|catenin complex (GO:0016342)|cell-cell junction (GO:0005911)|cell junction (GO:0030054)|cell periphery (GO:0071944)|cellular anatomical entity (GO:0110165)|cellular_component (GO:0005575)|extrinsic component of membrane (GO:0019898)|extrinsic component of plasma membrane (GO:0019897)|integral component of membrane (GO:0016021)|intrins…		Cell junction organization (WP1793)|Hippo-Merlin signaling dysregulation (WP4541)|Hippo signaling regulation pathways (WP4540)|Malignant pleural mesothelioma (WP5087)|Neural crest differentiation (WP2064)	-	-	-	-	-	UP	P8	-0.338993	0.380473	0.267156	0.0751926	-0.167761	-0.630253	0.51392	-0.689714	0.796113	-0.0354665	-0.130482	0.211599	0.830004	-0.0316731	-0.868848	0.118111	-0.901842	-0.0831859	0.684761	-0.678377	0.120275	-0.289179	0.565225	0.104389	-0.260416	0.017339	-0.197097	0.00496843	1.04564	-0.166714	0.202379	0.553205	0.542355	0.114062	0.125039	-0.491766
HERPUD1	homocysteine inducible ER protein with ubiquitin like domain 1	amide transport (GO:0042886)|anion transport (GO:0006820)|apoptotic process (GO:0006915)|apoptotic signaling pathway (GO:0097190)|biological regulation (GO:0065007)|biological_process (GO:0008150)|calcium ion homeostasis (GO:0055074)|catabolic process (GO:0009056)|cation homeostasis (GO:0055080)|cell communication (GO:0007154)|cell death (GO:0008219)|cellular calcium ion homeostasis (GO:0006874)|…	binding (GO:0005488)|ion channel binding (GO:0044325)|molecular adaptor activity (GO:0060090)|molecular_function (GO:0003674)|protein-macromolecule adaptor activity (GO:0030674)|protein binding (GO:0005515)|ubiquitin ligase-substrate adaptor activity (GO:1990756)	cellular anatomical entity (GO:0110165)|cellular_component (GO:0005575)|cytoplasm (GO:0005737)|endomembrane system (GO:0012505)|endoplasmic reticulum (GO:0005783)|endoplasmic reticulum membrane (GO:0005789)|endoplasmic reticulum quality control compartment (GO:0044322)|endoplasmic reticulum subcompartment (GO:0098827)|inclusion body (GO:0016234)|integral component of membrane (GO:0016021)|intrace…	hsa04141 Protein processing in endoplasmic reticulum	ATF4 activates genes in response to endoplasmic reticulum stress (WP2753)|Exercise-induced circadian regulation (WP410)|VEGFA-VEGFR2 signaling pathway (WP3888)	-	-	-	-	-	UP	P8	-0.00869045	0.692607	-0.0470464	-0.42515	-0.0722816	-0.237063	-0.0159154	-0.0222577	1.43561	0.211475	-0.276784	-0.369633	0.250544	0.585063	-0.86473	0.133099	0.234767	0.0633265	0.548025	0.0558092	-0.180496	0.20766	0.619851	0.319895	-0.286968	0.924671	-0.274657	-0.105304	0.632734	-0.0712239	0.342284	0.283784	0.403264	0.580077	-0.294518	1.16598
KHNYN	KH and NYN domain containing	biological_process (GO:0008150)|cellular aromatic compound metabolic process (GO:0006725)|cellular metabolic process (GO:0044237)|cellular nitrogen compound metabolic process (GO:0034641)|cellular process (GO:0009987)|heterocycle metabolic process (GO:0046483)|macromolecule metabolic process (GO:0043170)|metabolic process (GO:0008152)|nitrogen compound metabolic process (GO:0006807)|nucleic acid …	binding (GO:0005488)|catalytic activity (GO:0003824)|catalytic activity, acting on RNA (GO:0140098)|endonuclease activity (GO:0004519)|endoribonuclease activity (GO:0004521)|heterocyclic compound binding (GO:1901363)|hydrolase activity (GO:0016787)|hydrolase activity, acting on ester bonds (GO:0016788)|molecular_function (GO:0003674)|mRNA binding (GO:0003729)|nuclease activity (GO:0004518)|nuclei…	cellular anatomical entity (GO:0110165)|cellular_component (GO:0005575)|cytoplasm (GO:0005737)|cytoplasmic ribonucleoprotein granule (GO:0036464)|intracellular anatomical structure (GO:0005622)|intracellular membrane-bounded organelle (GO:0043231)|intracellular non-membrane-bounded organelle (GO:0043232)|intracellular organelle (GO:0043229)|membrane-bounded organelle (GO:0043227)|non-membrane-bou…			-	-	-	-	-	UP	P8	0.0754652	-0.0518078	0.665436	-0.239603	-0.493369	0.342511	0.117211	0.419119	0.786889	0.436328	-0.0969769	-0.316161	-0.421213	-0.256691	-0.484124	0.122163	-1.18518	-0.135247	0.76852	-0.465996	-0.295161	0.163307	-0.351722	-1.12541	0.681496	-0.159672	-0.630571	0.571326	0.144571	0.774612	-0.267732	-0.239589	0.161398	0.557974	-0.945848	-0.210481
PPP2CA	protein phosphatase 2 catalytic subunit alpha	anatomical structure development (GO:0048856)|animal organ development (GO:0048513)|apoptotic process (GO:0006915)|aromatic compound biosynthetic process (GO:0019438)|aromatic compound catabolic process (GO:0019439)|biological adhesion (GO:0022610)|biological regulation (GO:0065007)|biological_process (GO:0008150)|biosynthetic process (GO:0009058)|catabolic process (GO:0009056)|cell-cell signalin…	binding (GO:0005488)|catalytic activity (GO:0003824)|catalytic activity, acting on a protein (GO:0140096)|cation binding (GO:0043169)|cytoskeletal protein binding (GO:0008092)|GABA receptor binding (GO:0050811)|hydrolase activity (GO:0016787)|hydrolase activity, acting on ester bonds (GO:0016788)|ion binding (GO:0043167)|metal ion binding (GO:0046872)|molecular_function (GO:0003674)|phosphatase a…	catalytic complex (GO:1902494)|cell junction (GO:0030054)|cell periphery (GO:0071944)|cellular anatomical entity (GO:0110165)|cellular_component (GO:0005575)|chromosomal region (GO:0098687)|chromosome (GO:0005694)|chromosome, centromeric region (GO:0000775)|cytoplasm (GO:0005737)|cytoskeleton (GO:0005856)|cytosol (GO:0005829)|extracellular exosome (GO:0070062)|extracellular organelle (GO:0043230)…	hsa03015 mRNA surveillance pathway|hsa04071 Sphingolipid signaling pathway|hsa04114 Oocyte meiosis|hsa04136 Autophagy - other|hsa04140 Autophagy - animal|hsa04151 PI3K-Akt signaling pathway|hsa04152 AMPK signaling pathway|hsa04261 Adrenergic signaling in cardiomyocytes|hsa04350 TGF-beta signaling pathway|hsa04390 Hippo signaling pathway|hsa04530 Tight junction|hsa04728 Dopaminergic synapse|hsa047…	16p11.2 proximal deletion syndrome (WP4949)|Brain-derived neurotrophic factor (BDNF) signaling pathway (WP2380)|Cancer immunotherapy by CTLA4 blockade (WP4582)|Cell cycle checkpoints (WP1775)|Cohesin complex - Cornelia de Lange syndrome (WP5117)|Costimulation by the CD28 family (WP1799)|Degradation of beta-catenin by the destruction complex (WP2773)|Dopamine metabolism (WP2436)|FGFR3 signaling in…	-	-	-	-	-	UP	P8	-0.0371786	0.324045	-0.669248	0.961974	-0.244882	-0.114065	-0.459135	-0.595731	0.211561	-0.0382878	-0.0501595	0.227707	-0.110233	0.291013	-0.529203	0.340767	0.0689426	0.142081	0.324966	0.423534	0.0887413	0.745544	-0.0240287	-0.00660839	0.618575	0.0085125	-0.0465309	-0.33248	0.0531822	0.0461724	0.569538	-0.218646	0.510106	0.247841	0.0247015	-0.314715
RNF141	ring finger protein 141	aromatic compound biosynthetic process (GO:0019438)|biological regulation (GO:0065007)|biological_process (GO:0008150)|biosynthetic process (GO:0009058)|cellular aromatic compound metabolic process (GO:0006725)|cellular biosynthetic process (GO:0044249)|cellular macromolecule biosynthetic process (GO:0034645)|cellular macromolecule metabolic process (GO:0044260)|cellular metabolic process (GO:004…	binding (GO:0005488)|catalytic activity (GO:0003824)|catalytic activity, acting on a protein (GO:0140096)|cation binding (GO:0043169)|ion binding (GO:0043167)|metal ion binding (GO:0046872)|molecular_function (GO:0003674)|protein binding (GO:0005515)|transferase activity (GO:0016740)|ubiquitin-like protein transferase activity (GO:0019787)|ubiquitin-protein transferase activity (GO:0004842)	cellular anatomical entity (GO:0110165)|cellular_component (GO:0005575)|membrane (GO:0016020)			-	-	-	-	-	UP	P8	-0.359359	-0.0737222	0.358114	0.320239	-0.73654	-0.7432	0.089474	0.381663	0.400646	0.239866	-0.147721	-0.278159	0.266543	-0.210371	-0.083735	0.0235994	0.667252	-0.306938	-0.417836	0.0130199	0.471931	-0.326674	-0.00455999	-0.500226	0.996778	0.0807928	0.0554463	-0.147351	-0.323099	0.192435	0.369676	-0.147824	1.12047	0.339443	-0.108477	0.274991
SLC1A5	solute carrier family 1 member 5	amino acid import (GO:0043090)|amino acid import across plasma membrane (GO:0089718)|amino acid transmembrane transport (GO:0003333)|amino acid transport (GO:0006865)|anion transmembrane transport (GO:0098656)|anion transport (GO:0006820)|biological process involved in interaction with host (GO:0051701)|biological process involved in interspecies interaction between organisms (GO:0044419)|biologi…	acidic amino acid transmembrane transporter activity (GO:0015172)|active transmembrane transporter activity (GO:0022804)|amino acid transmembrane transporter activity (GO:0015171)|anion transmembrane transporter activity (GO:0008509)|binding (GO:0005488)|C4-dicarboxylate transmembrane transporter activity (GO:0015556)|carboxylic acid transmembrane transporter activity (GO:0046943)|cation binding …	basal part of cell (GO:0045178)|basal plasma membrane (GO:0009925)|cell periphery (GO:0071944)|cellular anatomical entity (GO:0110165)|cellular_component (GO:0005575)|cytoplasm (GO:0005737)|cytoplasmic vesicle (GO:0031410)|extracellular exosome (GO:0070062)|extracellular organelle (GO:0043230)|extracellular region (GO:0005576)|extracellular space (GO:0005615)|extracellular vesicle (GO:1903561)|in…	hsa04974 Protein digestion and absorption|hsa05230 Central carbon metabolism in cancer	Amino acid metabolism in triple-negative breast cancer cells (WP5213)|Ferroptosis (WP4313)|Metabolic reprogramming in colon cancer (WP4290)|Metabolic reprogramming in pancreatic cancer (WP5220)|mRNA, protein, and metabolite inducation pathway by cyclosporin A (WP3953)|Transport of inorganic cations/anions and amino acids/oligopeptides (WP1936)|TYROBP causal network in microglia (WP3945)	-	-	-	-	-	UP	P8	0.787782	0.27057	0.146181	-0.823781	0.0362884	-0.572501	0.488842	0.732795	0.874006	0.609448	-0.148703	0.211461	0.592328	0.612493	0.383164	-0.780432	0.348648	-0.119103	0.0524045	1.26862	1.2358	1.00967	-0.620067	-0.0776603	0.156013	1.04279	0.918296	-0.289837	0.504252	-0.116574	0.318496	-0.458629	0.66569	0.197872	0.856746	0.259575
SPINK2	serine peptidase inhibitor Kazal type 2	acrosome assembly (GO:0001675)|anatomical structure development (GO:0048856)|anatomical structure formation involved in morphogenesis (GO:0048646)|anatomical structure morphogenesis (GO:0009653)|biological regulation (GO:0065007)|biological_process (GO:0008150)|cell development (GO:0048468)|cell differentiation (GO:0030154)|cellular component assembly (GO:0022607)|cellular component assembly invo…	binding (GO:0005488)|endopeptidase inhibitor activity (GO:0004866)|endopeptidase regulator activity (GO:0061135)|enzyme inhibitor activity (GO:0004857)|enzyme regulator activity (GO:0030234)|molecular function regulator (GO:0098772)|molecular_function (GO:0003674)|peptidase inhibitor activity (GO:0030414)|peptidase regulator activity (GO:0061134)|protein binding (GO:0005515)|serine-type endopepti…	acrosomal vesicle (GO:0001669)|cellular anatomical entity (GO:0110165)|cellular_component (GO:0005575)|cytoplasm (GO:0005737)|cytoplasmic vesicle (GO:0031410)|endomembrane system (GO:0012505)|extracellular region (GO:0005576)|intracellular anatomical structure (GO:0005622)|intracellular vesicle (GO:0097708)|membrane-bounded organelle (GO:0043227)|organelle (GO:0043226)|secretory granule (GO:00301…			-	-	-	-	-	UP	P8	-0.156223	-0.447042	-0.0126929	-0.898435	-0.0769971	0.454967	-0.587784	-0.279067	-0.361775	0.328502	-0.918741	-0.409204	0.40757	0.70227	0.397414	0.0588973	0.0548157	0.1009	-1.0324	0.0664528	-0.154398	0.0570674	-0.154314	-0.755301	0.0995656	-0.921397	-0.170914	0.00280937	-0.786121	0.740034	0.222837	-0.147899	-0.533127	-0.529473	0.483657	0.623797
SQSTM1	sequestosome 1	aggrephagy (GO:0035973)|anterograde trans-synaptic signaling (GO:0098916)|apoptotic process (GO:0006915)|aromatic compound biosynthetic process (GO:0019438)|autophagy (GO:0006914)|autophagy of mitochondrion (GO:0000422)|biological regulation (GO:0065007)|biological_process (GO:0008150)|biosynthetic process (GO:0009058)|catabolic process (GO:0009056)|cell-cell signaling (GO:0007267)|cell communica…	binding (GO:0005488)|catalytic activity (GO:0003824)|catalytic activity, acting on a protein (GO:0140096)|cation binding (GO:0043169)|enzyme binding (GO:0019899)|glutamate receptor binding (GO:0035254)|identical protein binding (GO:0042802)|ion binding (GO:0043167)|ionotropic glutamate receptor binding (GO:0035255)|K63-linked polyubiquitin modification-dependent protein binding (GO:0070530)|kinas…	9+2 motile cilium (GO:0097729)|aggresome (GO:0016235)|amphisome (GO:0044753)|autolysosome (GO:0044754)|autophagosome (GO:0005776)|cell projection (GO:0042995)|cellular anatomical entity (GO:0110165)|cellular_component (GO:0005575)|cilium (GO:0005929)|contractile fiber (GO:0043292)|cytoplasm (GO:0005737)|cytoplasmic ribonucleoprotein granule (GO:0036464)|cytoplasmic vesicle (GO:0031410)|cytosol (G…	hsa04137 Mitophagy - animal|hsa04140 Autophagy - animal|hsa04217 Necroptosis|hsa04218 Cellular senescence|hsa04380 Osteoclast differentiation|hsa05014 Amyotrophic lateral sclerosis|hsa05022 Pathways of neurodegeneration - multiple diseases|hsa05131 Shigellosis|hsa05418 Fluid shear stress and atherosclerosis	7q11.23 copy number variation syndrome (WP4932)|Apoptosis-related network due to altered Notch3 in ovarian cancer (WP2864)|Brain-derived neurotrophic factor (BDNF) signaling pathway (WP2380)|CAMKK2 pathway (WP4874)|Clear cell renal cell carcinoma pathways (WP4018)|Clock-controlled autophagy in bone metabolism (WP5205)|IL-1 signaling pathway (WP195)|Interleukin-1 family signaling (WP1839)|Interleu…	-	-	-	-	-	UP	P8	0.469254	0.978794	0.915199	-0.0641399	0.611272	-0.16855	0.0636288	0.489014	1.29048	-0.195573	0.573231	-0.0518954	0.0737792	0.196703	-0.054873	0.980405	-0.301216	0.274045	0.637033	1.65068	1.25498	1.67167	0.352969	-0.135087	0.872641	0.356379	0.458646	-0.187845	1.93583	0.627507	0.143673	0.285184	0.664053	0.338194	0.0191062	0.183804
SRXN1	sulfiredoxin 1	biological_process (GO:0008150)|cellular detoxification (GO:1990748)|cellular oxidant detoxification (GO:0098869)|cellular process (GO:0009987)|cellular response to chemical stimulus (GO:0070887)|cellular response to chemical stress (GO:0062197)|cellular response to oxidative stress (GO:0034599)|cellular response to stimulus (GO:0051716)|cellular response to stress (GO:0033554)|cellular response …	adenyl nucleotide binding (GO:0030554)|adenyl ribonucleotide binding (GO:0032559)|anion binding (GO:0043168)|antioxidant activity (GO:0016209)|ATP binding (GO:0005524)|binding (GO:0005488)|carbohydrate derivative binding (GO:0097367)|catalytic activity (GO:0003824)|heterocyclic compound binding (GO:1901363)|ion binding (GO:0043167)|molecular_function (GO:0003674)|nucleoside phosphate binding (GO:…	cellular anatomical entity (GO:0110165)|cellular_component (GO:0005575)|cytoplasm (GO:0005737)|cytosol (GO:0005829)|intracellular anatomical structure (GO:0005622)		NRF2 pathway (WP2884)|Nuclear receptors meta-pathway (WP2882)|Photodynamic therapy-induced NFE2L2 (NRF2) survival signaling (WP3612)	-	-	-	-	-	UP	P8	-0.0602439	0.581937	0.399261	-0.550899	0.118366	0.369535	0.146641	0.646475	1.11179	0.83529	-0.0837139	-0.163056	-1.02968	0.094455	0.189653	0.6207	-0.0482837	0.289163	0.543428	-0.299703	-0.0354802	0.411034	-1.05174	-1.00057	0.898561	0.0336142	0.859646	0.156734	0.535145	0.00782727	-0.567595	0.215055	0.0674103	0.538869	-1.15521	0.0759362
TXNRD1	thioredoxin reductase 1	anatomical structure development (GO:0048856)|anatomical structure formation involved in morphogenesis (GO:0048646)|anatomical structure morphogenesis (GO:0009653)|biological regulation (GO:0065007)|biological_process (GO:0008150)|cell communication (GO:0007154)|cell population proliferation (GO:0008283)|cell redox homeostasis (GO:0045454)|cellular aromatic compound metabolic process (GO:0006725)…	anion binding (GO:0043168)|antioxidant activity (GO:0016209)|binding (GO:0005488)|catalytic activity (GO:0003824)|disulfide oxidoreductase activity (GO:0015036)|flavin adenine dinucleotide binding (GO:0050660)|heterocyclic compound binding (GO:1901363)|ion binding (GO:0043167)|molecular_function (GO:0003674)|nucleoside phosphate binding (GO:1901265)|nucleotide binding (GO:0000166)|organic cyclic …	cellular anatomical entity (GO:0110165)|cellular_component (GO:0005575)|cytoplasm (GO:0005737)|cytosol (GO:0005829)|extracellular exosome (GO:0070062)|extracellular organelle (GO:0043230)|extracellular region (GO:0005576)|extracellular space (GO:0005615)|extracellular vesicle (GO:1903561)|fibrillar center (GO:0001650)|intracellular anatomical structure (GO:0005622)|intracellular membrane-bounded …	hsa00450 Selenocompound metabolism|hsa05200 Pathways in cancer|hsa05225 Hepatocellular carcinoma	Detoxification of reactive oxygen species (WP2824)|Ferroptosis (WP4313)|Interconversion of nucleotide di- and triphosphates (WP4059)|miR-targeted genes in leukocytes (WP2003)|miR-targeted genes in lymphocytes (WP2004)|miR-targeted genes in muscle cell (WP2005)|miR-targeted genes in squamous cell (WP2006)|NRF2 pathway (WP2884)|Nuclear receptors meta-pathway (WP2882)|Oxidative stress response (WP40…	-	-	-	-	-	UP	P8	0.034578	0.0906907	0.686877	-0.405748	0.594963	0.204799	0.120723	0.246932	0.504024	-0.486281	0.281493	0.289695	-0.0128674	-0.365973	-0.0647792	0.00110736	-0.0114282	-0.37085	0.183094	0.979531	0.283888	0.410299	-0.54172	0.334688	0.347219	0.175206	0.237861	0.662208	0.208677	0.30028	0.464484	-0.013784	0.457508	0.327178	-0.111776	0.396177
ZFC3H1	zinc finger C3H1-type containing	biological_process (GO:0008150)|cellular aromatic compound metabolic process (GO:0006725)|cellular metabolic process (GO:0044237)|cellular nitrogen compound metabolic process (GO:0034641)|cellular process (GO:0009987)|gene expression (GO:0010467)|heterocycle metabolic process (GO:0046483)|macromolecule metabolic process (GO:0043170)|metabolic process (GO:0008152)|nitrogen compound metabolic proce…	binding (GO:0005488)|cation binding (GO:0043169)|ion binding (GO:0043167)|metal ion binding (GO:0046872)|molecular_function (GO:0003674)|protein binding (GO:0005515)	catalytic complex (GO:1902494)|cellular anatomical entity (GO:0110165)|cellular_component (GO:0005575)|exoribonuclease complex (GO:1905354)|exosome (RNase complex) (GO:0000178)|extracellular region (GO:0005576)|extracellular space (GO:0005615)|intracellular anatomical structure (GO:0005622)|intracellular membrane-bounded organelle (GO:0043231)|intracellular organelle (GO:0043229)|membrane-bounded…			-	-	-	-	-	UP	P8	-0.38446	-0.220336	0.215911	0.169269	-0.201077	0.286506	0.915975	-0.0100846	0.303645	-0.722573	-0.119798	-0.39419	0.401478	-0.0650354	0.094621	-0.092409	0.0448096	0.663723	-0.199471	0.406104	-0.369738	0.783206	0.274794	0.0899842	0.0610204	-0.346049	-1.02461	-0.476177	0.159775	-0.277383	-0.117845	0.0939944	-0.109183	-0.516957	0.0731305	0.164665
FADS2	fatty acid desaturase 2	alpha-linolenic acid metabolic process (GO:0036109)|biological_process (GO:0008150)|biosynthetic process (GO:0009058)|carboxylic acid biosynthetic process (GO:0046394)|carboxylic acid metabolic process (GO:0019752)|cellular biosynthetic process (GO:0044249)|cellular lipid metabolic process (GO:0044255)|cellular metabolic process (GO:0044237)|cellular process (GO:0009987)|fatty acid biosynthetic p…	acyl-CoA desaturase activity (GO:0016215)|catalytic activity (GO:0003824)|linoleoyl-CoA desaturase activity (GO:0016213)|molecular_function (GO:0003674)|oxidoreductase activity (GO:0016491)|oxidoreductase activity, acting on paired donors, with incorporation or reduction of molecular oxygen (GO:0016705)|oxidoreductase activity, acting on paired donors, with oxidation of a pair of donors resulting…	cell periphery (GO:0071944)|cellular anatomical entity (GO:0110165)|cellular_component (GO:0005575)|cytoplasm (GO:0005737)|endomembrane system (GO:0012505)|endoplasmic reticulum (GO:0005783)|endoplasmic reticulum membrane (GO:0005789)|endoplasmic reticulum subcompartment (GO:0098827)|integral component of membrane (GO:0016021)|integral component of plasma membrane (GO:0005887)|intracellular anato…	hsa00592 alpha-Linolenic acid metabolism|hsa01040 Biosynthesis of unsaturated fatty acids|hsa01100 Metabolic pathways|hsa01212 Fatty acid metabolism|hsa03320 PPAR signaling pathway	Alpha-linolenic (omega-3) and linoleic (omega-6) acid metabolism (WP2724)|Cholesterol metabolism with Bloch and Kandutsch-Russell pathways (WP4718)|Linoleic acid metabolism affected by SARS-CoV-2 (WP4853)|Metabolism of alpha-linolenic acid (WP4586)|miR-targeted genes in lymphocytes (WP2004)|miR-targeted genes in muscle cell (WP2005)|Omega-3 / omega-6 fatty acid synthesis (WP4723)|Omega-9 fatty ac…	DOWN	-	-	-	-	-	P9	-1.09734	-0.507021	-0.453248	-0.481211	-0.353714	-0.32105	-0.565314	-0.141824	-0.625673	-1.0146	-0.967991	0.44412	-0.360869	-0.446975	0.0300669	-0.646073	0.167564	0.484354	-0.469591	0.408209	0.158488	0.447496	-1.4247	-0.509557	-0.130667	0.0433038	-0.327611	-0.693102	0.374976	-0.99333	0.479482	0.467474	0.366926	-0.509851	-0.286956	0.854831
TRIM52-AS1	TRIM52 antisense RNA 1 (head to head)						DOWN	-	-	-	-	-	P9	-0.621209	0.513058	-0.537191	-0.424035	-0.875014	-0.656756	-0.278195	-0.866921	-0.279492	-0.443445	-0.473021	0.515423	-0.605662	0.832053	-0.651253	-0.383678	-0.013342	-0.532698	-0.608896	0.135054	0.193483	-0.547636	-0.512348	-0.669288	0.125264	0.0310903	-0.21106	0.779584	-0.517983	-0.406484	0.466067	-0.137169	0.902189	0.855395	0.998343	0.53629
MTA2	metastasis associated 1 family member 2	ameboidal-type cell migration (GO:0001667)|aromatic compound biosynthetic process (GO:0019438)|ATP-dependent chromatin remodeling (GO:0043044)|biological regulation (GO:0065007)|biological_process (GO:0008150)|biosynthetic process (GO:0009058)|cell communication (GO:0007154)|cell migration (GO:0016477)|cell motility (GO:0048870)|cellular aromatic compound metabolic process (GO:0006725)|cellular b…	binding (GO:0005488)|catalytic activity (GO:0003824)|catalytic activity, acting on a protein (GO:0140096)|cation binding (GO:0043169)|chromatin binding (GO:0003682)|chromatin DNA binding (GO:0031490)|deacetylase activity (GO:0019213)|DNA-binding transcription factor binding (GO:0140297)|DNA binding (GO:0003677)|enzyme binding (GO:0019899)|heterocyclic compound binding (GO:1901363)|histone deacety…	ATPase complex (GO:1904949)|catalytic complex (GO:1902494)|cellular anatomical entity (GO:0110165)|cellular_component (GO:0005575)|CHD-type complex (GO:0090545)|chromatin (GO:0000785)|chromosome (GO:0005694)|histone deacetylase complex (GO:0000118)|intracellular anatomical structure (GO:0005622)|intracellular membrane-bounded organelle (GO:0043231)|intracellular non-membrane-bounded organelle (GO…		Chromatin organization (WP4096)|Effect of progerin on genes involved in Hutchinson-Gilford progeria syndrome (WP4320)|ERCC6 (CSB) and EHMT2 (G9a) positively regulate rRNA expression (WP3801)|PTEN Regulation (WP4047)|Regulation of TP53 Activity through Acetylation (WP3816)|RNA Polymerase I Transcription (WP4074)	-	-	-	-	UP	-	P9	0.108062	0.0250046	-0.448667	0.0099387	-0.642592	-0.355857	0.122752	0.803001	-0.336651	0.913718	-0.554082	-1.32611	-0.203872	-1.39623	-0.570927	-0.454491	-0.617009	-0.812034	0.11738	0.491253	0.367393	0.428439	0.858468	1.16181	0.425682	0.424373	0.578066	0.590339	1.12366	0.510102	-0.442277	-0.469655	0.484275	0.370861	0.288023	0.159535
STXBP5	syntaxin binding protein 5	amide transport (GO:0042886)|anion transport (GO:0006820)|anterograde trans-synaptic signaling (GO:0098916)|biological regulation (GO:0065007)|biological_process (GO:0008150)|cell-cell signaling (GO:0007267)|cell communication (GO:0007154)|cellular component assembly (GO:0022607)|cellular component biogenesis (GO:0044085)|cellular component organization (GO:0016043)|cellular component organizatio…	binding (GO:0005488)|cytoskeletal protein binding (GO:0008092)|enzyme activator activity (GO:0008047)|enzyme regulator activity (GO:0030234)|GTPase activator activity (GO:0005096)|GTPase regulator activity (GO:0030695)|molecular function regulator (GO:0098772)|molecular_function (GO:0003674)|myosin binding (GO:0017022)|myosin II binding (GO:0045159)|nucleoside-triphosphatase regulator activity (G…	acetylcholine-gated channel complex (GO:0005892)|bounding membrane of organelle (GO:0098588)|cell junction (GO:0030054)|cell periphery (GO:0071944)|cellular anatomical entity (GO:0110165)|cellular_component (GO:0005575)|cytoplasm (GO:0005737)|cytoplasmic vesicle (GO:0031410)|cytoplasmic vesicle membrane (GO:0030659)|cytosol (GO:0005829)|dense core granule (GO:0031045)|dense core granule membrane …			-	-	-	-	UP	-	P9	-0.507995	-0.710179	-0.476974	-0.46476	-0.17861	0.29159	0.0782926	-0.00600798	-0.361527	0.0734711	0.0648124	0.185843	0.40338	-0.248047	0.817569	0.366713	0.0877068	0.0988185	-0.00549073	0.0619616	0.615858	0.795048	0.262374	0.474785	0.43785	0.0135614	0.209684	0.324294	0.623644	0.762255	-0.79917	0.289606	0.527015	0.101025	0.109415	-0.182775
GINS3	GINS complex subunit 3	biological_process (GO:0008150)|biosynthetic process (GO:0009058)|cell cycle (GO:0007049)|cell cycle DNA replication (GO:0044786)|cell cycle DNA replication initiation (GO:1902292)|cell cycle process (GO:0022402)|cellular aromatic compound metabolic process (GO:0006725)|cellular biosynthetic process (GO:0044249)|cellular macromolecule biosynthetic process (GO:0034645)|cellular macromolecule metab…	binding (GO:0005488)|molecular_function (GO:0003674)|protein binding (GO:0005515)	cellular anatomical entity (GO:0110165)|cellular_component (GO:0005575)|chromosome (GO:0005694)|CMG complex (GO:0071162)|DNA replication preinitiation complex (GO:0031261)|GINS complex (GO:0000811)|intracellular anatomical structure (GO:0005622)|intracellular membrane-bounded organelle (GO:0043231)|intracellular non-membrane-bounded organelle (GO:0043232)|intracellular organelle (GO:0043229)|intr…		Synthesis of DNA (WP1925)	-	-	-	-	-	DOWN	P9	-0.142141	0.794097	-0.0366867	0.140936	0.725737	-0.167616	-0.557218	-0.0239007	-0.0695881	-0.533184	0.0242851	-0.668451	-0.254412	0.190178	-0.400919	0.736464	-0.320296	0.143131	-0.0546004	-0.0560327	0.379204	1.2261	-0.503981	0.709448	0.417207	0.40101	-0.622348	0.00726876	0.282147	0.34212	-1.04211	-0.46537	-0.560622	0.350075	1.06667	-0.188902
[truncated: 20 more columns]
