# Supplementary material for: Expression of the endocannabinoid system and response to cannabinoid components by the human fetal testis
Source: BMC Med. 2023 Jul 11;21:219. doi: 10.1186/s12916-023-02916-5 (PMC10334520; doi:10.1186/s12916-023-02916-5)
Supplement: Supplementary file 4 — Additional file 4: Table 2. Gene Ontology term enrichment analysis of the DEGs. [file 12916_2023_2916_MOESM4_ESM.xlsx]

## Sheet: STRATEGY3.corr.manual_STEP3_ann
term	category	gene.cluster	genes	r	R	n	N	rExpected	adj.p.hyper.enri	community	info
stress response to metal ion (GO:0097501)	biological_process	CBD - 10-12GW - UP	MT1E|MT1F|MT1G|MT1X|SLC30A1	5	55	18	18398	0	1.3198e-05	m1	top.enriched
zinc ion homeostasis (GO:0055069)	biological_process	CBD - 10-12GW - UP	MT1E|MT1F|MT1G|MT1X|SLC30A1	5	55	40	18398	0	0.000275507	m1	enriched
response to zinc ion (GO:0010043)	biological_process	CBD - 10-12GW - UP	MT1E|MT1F|MT1G|MT1X|SLC30A1	5	55	57	18398	0	0.00118082	m1	enriched
response to cadmium ion (GO:0046686)	biological_process	CBD - 10-12GW - UP	MT1E|MT1F|MT1G|MT1X|SLC30A1	5	55	60	18398	0	0.00139071	m1	enriched
detoxification (GO:0098754)	biological_process	CBD - 10-12GW - UP	MT1E|MT1F|MT1G|MT1X|SLC30A1	5	55	136	18398	0	0.0303156	m1	enriched
detoxification of inorganic compound (GO:0061687)	biological_process	CBD - 10-12GW - UP	MT1E|MT1F|MT1G|MT1X|SLC30A1	5	55	17	18398	0	1.3198e-05	m1	enriched
cellular zinc ion homeostasis (GO:0006882)	biological_process	CBD - 10-12GW - UP	MT1E|MT1F|MT1G|MT1X|SLC30A1	5	55	38	18398	0	0.000254064	m1	enriched
detoxification of copper ion (GO:0010273)	biological_process	CBD - 10-12GW - UP	MT1E|MT1F|MT1G|MT1X	4	55	15	18398	0	0.000254064	m1	enriched
stress response to copper ion (GO:1990169)	biological_process	CBD - 10-12GW - UP	MT1E|MT1F|MT1G|MT1X	4	55	15	18398	0	0.000254064	m1	enriched
cellular response to zinc ion (GO:0071294)	biological_process	CBD - 10-12GW - UP	MT1E|MT1F|MT1G|MT1X	4	55	24	18398	0	0.00118082	m1	enriched
cellular response to copper ion (GO:0071280)	biological_process	CBD - 10-12GW - UP	MT1E|MT1F|MT1G|MT1X	4	55	28	18398	0	0.0018513	m1	enriched
cellular response to cadmium ion (GO:0071276)	biological_process	CBD - 10-12GW - UP	MT1E|MT1F|MT1G|MT1X	4	55	38	18398	0	0.00435188	m1	enriched
response to copper ion (GO:0046688)	biological_process	CBD - 10-12GW - UP	MT1E|MT1F|MT1G|MT1X	4	55	40	18398	0	0.00508188	m1	enriched
response to toxic substance (GO:0009636)	biological_process	CBD - 10-12GW - UP	MT1E|MT1F|MT1G|MT1X|NUPR1|SLC30A1	6	55	236	18398	1	0.0395727	m1	enriched
cellular transition metal ion homeostasis (GO:0046916)	biological_process	CBD - 10-12GW - UP	FTH1|FTL|MT1E|MT1F|MT1G|MT1X|SLC30A1	7	55	117	18398	0	0.000254064	m2	top.enriched
transition metal ion homeostasis (GO:0055076)	biological_process	CBD - 10-12GW - UP	FTH1|FTL|MT1E|MT1F|MT1G|MT1X|SLC30A1	7	55	138	18398	0	0.000344872	m2	enriched
neutrophil activation (GO:0042119)	biological_process	CBD - 10-12GW - UP	ASAH1|BRI3|CD68|CTSD|CXCL8|CYBA|FTH1|FTL|GM2A|SLC2A3	10	55	500	18398	1	0.00241482	m3	top.enriched
granulocyte activation (GO:0036230)	biological_process	CBD - 10-12GW - UP	ASAH1|BRI3|CD68|CTSD|CXCL8|CYBA|FTH1|FTL|GM2A|SLC2A3	10	55	506	18398	2	0.00242063	m3	enriched
neutrophil degranulation (GO:0043312)	biological_process	CBD - 10-12GW - UP	ASAH1|BRI3|CD68|CTSD|CYBA|FTH1|FTL|GM2A|SLC2A3	9	55	485	18398	1	0.00942009	m3	enriched
neutrophil activation involved in immune response (GO:0002283)	biological_process	CBD - 10-12GW - UP	ASAH1|BRI3|CD68|CTSD|CYBA|FTH1|FTL|GM2A|SLC2A3	9	55	488	18398	1	0.00944462	m3	enriched
neutrophil mediated immunity (GO:0002446)	biological_process	CBD - 10-12GW - UP	ASAH1|BRI3|CD68|CTSD|CYBA|FTH1|FTL|GM2A|SLC2A3	9	55	499	18398	1	0.0103358	m3	enriched
leukocyte degranulation (GO:0043299)	biological_process	CBD - 10-12GW - UP	ASAH1|BRI3|CD68|CTSD|CYBA|FTH1|FTL|GM2A|SLC2A3	9	55	535	18398	2	0.0171932	m3	enriched
myeloid cell activation involved in immune response (GO:0002275)	biological_process	CBD - 10-12GW - UP	ASAH1|BRI3|CD68|CTSD|CYBA|FTH1|FTL|GM2A|SLC2A3	9	55	548	18398	2	0.0197674	m3	enriched
myeloid leukocyte mediated immunity (GO:0002444)	biological_process	CBD - 10-12GW - UP	ASAH1|BRI3|CD68|CTSD|CYBA|FTH1|FTL|GM2A|SLC2A3	9	55	550	18398	2	0.0197674	m3	enriched
myeloid leukocyte activation (GO:0002274)	biological_process	CBD - 10-12GW - UP	ASAH1|BRI3|CD68|CTSD|CXCL8|CYBA|FTH1|FTL|GM2A|MT1G|SLC2A3	11	55	659	18398	2	0.003263	m3	enriched
regulated exocytosis (GO:0045055)	biological_process	CBD - 10-12GW - UP	ASAH1|BRI3|CD68|CTSD|CYBA|FTH1|FTL|GM2A|SLC2A3|VEGFB	10	55	777	18398	2	0.0458399	m3	enriched
leukocyte activation (GO:0045321)	biological_process	CBD - 10-12GW - UP	ASAH1|BRI3|CD68|CTSD|CXCL8|CYBA|DCLRE1C|EGR1|FNIP1|FTH1|FTL|GM2A|GPNMB|MT1G|SLC2A3	15	55	1240	18398	4	0.00242063	m4	top.enriched
cell activation (GO:0001775)	biological_process	CBD - 10-12GW - UP	ASAH1|BRI3|CD68|CTSD|CXCL8|CYBA|DCLRE1C|EGR1|FNIP1|FTH1|FTL|GM2A|GPNMB|MT1G|SLC2A3	15	55	1397	18398	4	0.00780981	m4	enriched
immune system process (GO:0002376)	biological_process	CBD - 10-12GW - UP	APOBEC3D|ASAH1|BRI3|CD68|CTSD|CXCL8|CYBA|DCLRE1C|EGR1|FNIP1|FTH1|FTL|GM2A|GPNMB|IFI30|ITLN1|MT1G|PABPC4|PARP9|SLC2A3|TRIM35|VEGFB|VPS26B	23	55	2957	18398	9	0.00435188	m5	top.enriched
immune response (GO:0006955)	biological_process	CBD - 10-12GW - UP	APOBEC3D|ASAH1|BRI3|CD68|CTSD|CXCL8|CYBA|DCLRE1C|EGR1|FTH1|FTL|GM2A|IFI30|ITLN1|PARP9|SLC2A3|TRIM35|VPS26B	18	55	2026	18398	6	0.00956248	m6	top.enriched
lysosome (GO:0005764)	cellular_component	CBD - 10-12GW - UP	ASAH1|BRI3|CD68|CTSD|FNIP1|FTH1|FTL|GM2A|IFI30|RRAGC	10	57	696	19014	2	0.018253	m1	top.enriched
lytic vacuole (GO:0000323)	cellular_component	CBD - 10-12GW - UP	ASAH1|BRI3|CD68|CTSD|FNIP1|FTH1|FTL|GM2A|IFI30|RRAGC	10	57	696	19014	2	0.018253	m1	enriched
vacuole (GO:0005773)	cellular_component	CBD - 10-12GW - UP	ASAH1|BRI3|CD68|CTSD|FNIP1|FTH1|FTL|GM2A|IFI30|RRAGC	10	57	790	19014	2	0.042101	m1	enriched
tertiary granule (GO:0070820)	cellular_component	CBD - 10-12GW - UP	ASAH1|CTSD|CYBA|FTH1|SLC2A3	5	57	164	19014	0	0.0432201	m2	top.enriched
vacuolar lumen (GO:0005775)	cellular_component	CBD - 10-12GW - UP	ASAH1|CTSD|FTL|GM2A|IFI30	5	57	173	19014	1	0.0432206	m3	top.enriched
secretory granule (GO:0030141)	cellular_component	CBD - 10-12GW - UP	ASAH1|BRI3|CD68|CTSD|CYBA|FTH1|FTL|GM2A|SLC2A3|VEGFB	10	57	845	19014	3	0.0432206	m4	top.enriched
lysosomal lumen (GO:0043202)	cellular_component	CBD - 10-12GW - UP	ASAH1|CTSD|GM2A|IFI30	4	57	96	19014	0	0.0432206	m5	top.enriched
hsa04978 Mineral absorption	kegg_pathway	CBD - 10-12GW - UP	FTH1|FTL|MT1E|MT1F|MT1G|MT1X|SLC30A1	7	34	60	8046	0	1.38628e-06	NA	enriched
Metallothioneins bind metals (WP3814)	WikiPathways	CBD - 10-12GW - UP	MT1E|MT1F|MT1G|MT1X	4	43	11	12535	0	5.27409e-05	m1	top.enriched
Copper homeostasis (WP3286)	WikiPathways	CBD - 10-12GW - UP	MT1E|MT1F|MT1G|MT1X	4	43	54	12535	0	0.0113528	m1	enriched
Zinc homeostasis (WP3529)	WikiPathways	CBD - 10-12GW - UP	MT1E|MT1F|MT1G|MT1X|SLC30A1	5	43	37	12535	0	0.000101737	m2	top.enriched
Neutrophil degranulation (WP4049)	WikiPathways	CBD - 10-12GW - UP	ASAH1|BRI3|CD68|CTSD|CYBA|FTH1|FTL|GM2A|SLC2A3	9	43	470	12535	2	0.011083	m3	top.enriched
small molecule metabolic process (GO:0044281)	biological_process	CBD - 10-12GW - DOWN	ACAT2|ACLY|DDAH2|DHCR7|EBP|EPHX2|EXTL2|FADS2|FDFT1|FDPS|HMGCR|HMGCS1|IDI1|LPIN1|MSMO1|MVD|NSDHL|SC5D|SCD|SQLE|STARD4|TM7SF2	22	50	1876	18398	5	4.58634e-07	m1	top.enriched
small molecule biosynthetic process (GO:0044283)	biological_process	CBD - 10-12GW - DOWN	ACAT2|ACLY|DHCR7|EBP|EPHX2|FADS2|FDFT1|FDPS|HMGCR|HMGCS1|IDI1|MSMO1|MVD|NSDHL|SC5D|SCD|SQLE|STARD4|TM7SF2	19	50	687	18398	2	4.55954e-12	m1	enriched
steroid metabolic process (GO:0008202)	biological_process	CBD - 10-12GW - DOWN	ACAT2|ACLY|DHCR7|EBP|EPHX2|ERG28|FDFT1|FDPS|HMGCR|HMGCS1|IDI1|IGFBP7|MSMO1|MVD|NSDHL|SC5D|SCD|SQLE|STARD4|TM7SF2	20	50	328	18398	1	3.42638e-19	m1	enriched
lipid biosynthetic process (GO:0008610)	biological_process	CBD - 10-12GW - DOWN	ACAT2|ACLY|DHCR7|EBP|EPHX2|ERG28|FADS2|FDFT1|FDPS|HMGCR|HMGCS1|IDI1|IGFBP7|LPIN1|MSMO1|MVD|NSDHL|SAMD8|SC5D|SCD|SQLE|STARD4|TM7SF2	23	50	726	18398	2	1.65535e-16	m1	enriched
lipid metabolic process (GO:0006629)	biological_process	CBD - 10-12GW - DOWN	ACAT2|ACLY|DHCR7|EBP|EPHX2|ERG28|FADS2|FDFT1|FDPS|HMGCR|HMGCS1|IDI1|IGFBP7|LPIN1|MSMO1|MVD|NSDHL|SAMD8|SC5D|SCD|SQLE|STARD4|TM7SF2	23	50	1423	18398	4	2.24254e-10	m1	enriched
sterol biosynthetic process (GO:0016126)	biological_process	CBD - 10-12GW - DOWN	ACAT2|ACLY|DHCR7|EBP|ERG28|FDFT1|FDPS|HMGCR|HMGCS1|IDI1|MSMO1|MVD|NSDHL|SC5D|SCD|SQLE|TM7SF2	17	50	78	18398	0	1.00784e-24	m1	enriched
cholesterol biosynthetic process (GO:0006695)	biological_process	CBD - 10-12GW - DOWN	ACAT2|ACLY|DHCR7|EBP|FDFT1|FDPS|HMGCR|HMGCS1|IDI1|MSMO1|MVD|NSDHL|SC5D|SCD|SQLE|TM7SF2	16	50	72	18398	0	1.19907e-23	m1	enriched
secondary alcohol biosynthetic process (GO:1902653)	biological_process	CBD - 10-12GW - DOWN	ACAT2|ACLY|DHCR7|EBP|FDFT1|FDPS|HMGCR|HMGCS1|IDI1|MSMO1|MVD|NSDHL|SC5D|SCD|SQLE|TM7SF2	16	50	72	18398	0	1.19907e-23	m1	enriched
steroid biosynthetic process (GO:0006694)	biological_process	CBD - 10-12GW - DOWN	ACAT2|ACLY|DHCR7|EBP|ERG28|FDFT1|FDPS|HMGCR|HMGCS1|IDI1|IGFBP7|MSMO1|MVD|NSDHL|SC5D|SCD|SQLE|STARD4|TM7SF2	19	50	190	18398	1	6.78107e-22	m1	enriched
sterol metabolic process (GO:0016125)	biological_process	CBD - 10-12GW - DOWN	ACAT2|ACLY|DHCR7|EBP|EPHX2|ERG28|FDFT1|FDPS|HMGCR|HMGCS1|IDI1|MSMO1|MVD|NSDHL|SC5D|SCD|SQLE|TM7SF2	18	50	165	18398	0	2.46045e-21	m1	enriched
cholesterol metabolic process (GO:0008203)	biological_process	CBD - 10-12GW - DOWN	ACAT2|ACLY|DHCR7|EBP|EPHX2|FDFT1|FDPS|HMGCR|HMGCS1|IDI1|MSMO1|MVD|NSDHL|SC5D|SCD|SQLE|TM7SF2	17	50	149	18398	0	2.27214e-20	m1	enriched
secondary alcohol metabolic process (GO:1902652)	biological_process	CBD - 10-12GW - DOWN	ACAT2|ACLY|DHCR7|EBP|EPHX2|FDFT1|FDPS|HMGCR|HMGCS1|IDI1|MSMO1|MVD|NSDHL|SC5D|SCD|SQLE|TM7SF2	17	50	158	18398	0	5.49743e-20	m1	enriched
alcohol biosynthetic process (GO:0046165)	biological_process	CBD - 10-12GW - DOWN	ACAT2|ACLY|DHCR7|EBP|FDFT1|FDPS|HMGCR|HMGCS1|IDI1|MSMO1|MVD|NSDHL|SC5D|SCD|SQLE|TM7SF2	16	50	155	18398	0	1.99889e-18	m1	enriched
organic hydroxy compound biosynthetic process (GO:1901617)	biological_process	CBD - 10-12GW - DOWN	ACAT2|ACLY|DHCR7|EBP|ERG28|FDFT1|FDPS|HMGCR|HMGCS1|IDI1|MSMO1|MVD|NSDHL|SC5D|SCD|SQLE|STARD4|TM7SF2	18	50	250	18398	1	2.64391e-18	m1	enriched
alcohol metabolic process (GO:0006066)	biological_process	CBD - 10-12GW - DOWN	ACAT2|ACLY|DHCR7|EBP|EPHX2|FDFT1|FDPS|HMGCR|HMGCS1|IDI1|MSMO1|MVD|NSDHL|SC5D|SCD|SQLE|TM7SF2	17	50	372	18398	1	5.54256e-14	m1	enriched
organic hydroxy compound metabolic process (GO:1901615)	biological_process	CBD - 10-12GW - DOWN	ACAT2|ACLY|DHCR7|EBP|EPHX2|ERG28|FDFT1|FDPS|HMGCR|HMGCS1|IDI1|MSMO1|MVD|NSDHL|SC5D|SCD|SQLE|STARD4|TM7SF2	19	50	554	18398	2	9.90288e-14	m1	enriched
regulation of cholesterol metabolic process (GO:0090181)	biological_process	CBD - 10-12GW - DOWN	DHCR7|EPHX2|FDFT1|FDPS|HMGCR|HMGCS1|IDI1|MVD|SC5D|SCD|SQLE|TM7SF2	12	50	61	18398	0	8.9605e-17	m2	top.enriched
regulation of steroid metabolic process (GO:0019218)	biological_process	CBD - 10-12GW - DOWN	DHCR7|EPHX2|FDFT1|FDPS|HMGCR|HMGCS1|IDI1|IGFBP7|MVD|SC5D|SCD|SQLE|STARD4|TM7SF2	14	50	122	18398	0	1.51086e-16	m2	enriched
regulation of steroid biosynthetic process (GO:0050810)	biological_process	CBD - 10-12GW - DOWN	DHCR7|FDFT1|FDPS|HMGCR|HMGCS1|IDI1|IGFBP7|MVD|SC5D|SCD|SQLE|STARD4|TM7SF2	13	50	91	18398	0	1.63649e-16	m2	enriched
regulation of cholesterol biosynthetic process (GO:0045540)	biological_process	CBD - 10-12GW - DOWN	DHCR7|FDFT1|FDPS|HMGCR|HMGCS1|IDI1|MVD|SC5D|SCD|SQLE|TM7SF2	11	50	48	18398	0	3.84934e-16	m2	enriched
regulation of sterol biosynthetic process (GO:0106118)	biological_process	CBD - 10-12GW - DOWN	DHCR7|FDFT1|FDPS|HMGCR|HMGCS1|IDI1|MVD|SC5D|SCD|SQLE|TM7SF2	11	50	48	18398	0	3.84934e-16	m2	enriched
regulation of alcohol biosynthetic process (GO:1902930)	biological_process	CBD - 10-12GW - DOWN	DHCR7|FDFT1|FDPS|HMGCR|HMGCS1|IDI1|MVD|SC5D|SCD|SQLE|TM7SF2	11	50	75	18398	0	7.03711e-14	m2	enriched
regulation of lipid biosynthetic process (GO:0046890)	biological_process	CBD - 10-12GW - DOWN	DHCR7|FDFT1|FDPS|HMGCR|HMGCS1|IDI1|IGFBP7|MVD|SAMD8|SC5D|SCD|SQLE|STARD4|TM7SF2	14	50	203	18398	1	1.3365e-13	m2	enriched
regulation of lipid metabolic process (GO:0019216)	biological_process	CBD - 10-12GW - DOWN	DHCR7|EPHX2|FDFT1|FDPS|HMGCR|HMGCS1|IDI1|IGFBP7|MVD|SAMD8|SC5D|SCD|SQLE|STARD4|TM7SF2	15	50	402	18398	1	7.78103e-11	m2	enriched
regulation of small molecule metabolic process (GO:0062012)	biological_process	CBD - 10-12GW - DOWN	DHCR7|EPHX2|FDFT1|FDPS|HMGCR|HMGCS1|IDI1|MVD|SC5D|SCD|SQLE|STARD4|TM7SF2	13	50	434	18398	1	6.27676e-08	m2	enriched
farnesyl diphosphate metabolic process (GO:0045338)	biological_process	CBD - 10-12GW - DOWN	FDFT1|FDPS|HMGCS1	3	50	5	18398	0	9.41506e-05	m3	top.enriched
isoprenoid biosynthetic process (GO:0008299)	biological_process	CBD - 10-12GW - DOWN	FDPS|HMGCR|HMGCS1|IDI1|MVD	5	50	28	18398	0	6.96991e-06	m3	enriched
cholesterol biosynthetic process via desmosterol (GO:0033489)	biological_process	CBD - 10-12GW - DOWN	DHCR7|EBP|SC5D	3	50	4	18398	0	4.16359e-05	m3	enriched
cholesterol biosynthetic process via lathosterol (GO:0033490)	biological_process	CBD - 10-12GW - DOWN	DHCR7|EBP|SC5D	3	50	4	18398	0	4.16359e-05	m3	enriched
isoprenoid metabolic process (GO:0006720)	biological_process	CBD - 10-12GW - DOWN	FDFT1|FDPS|HMGCR|HMGCS1|IDI1|MVD	6	50	143	18398	0	0.00112091	m3	enriched
nucleoside bisphosphate metabolic process (GO:0033865)	biological_process	CBD - 10-12GW - DOWN	ACLY|HMGCR|HMGCS1|MVD|SCD	5	50	140	18398	0	0.0161022	m3	enriched
purine nucleoside bisphosphate metabolic process (GO:0034032)	biological_process	CBD - 10-12GW - DOWN	ACLY|HMGCR|HMGCS1|MVD|SCD	5	50	140	18398	0	0.0161022	m3	enriched
ribonucleoside bisphosphate metabolic process (GO:0033875)	biological_process	CBD - 10-12GW - DOWN	ACLY|HMGCR|HMGCS1|MVD|SCD	5	50	140	18398	0	0.0161022	m3	enriched
phospholipid biosynthetic process (GO:0008654)	biological_process	CBD - 10-12GW - DOWN	FDPS|HMGCS1|IDI1|LPIN1|MVD|SAMD8	6	50	268	18398	1	0.0306882	m3	enriched
phospholipid metabolic process (GO:0006644)	biological_process	CBD - 10-12GW - DOWN	FDFT1|FDPS|HMGCS1|IDI1|LPIN1|MVD|SAMD8	7	50	418	18398	1	0.0454568	m3	enriched
cellular lipid metabolic process (GO:0044255)	biological_process	CBD - 10-12GW - DOWN	ACAT2|ACLY|EPHX2|FADS2|FDFT1|FDPS|HMGCR|HMGCS1|IDI1|LPIN1|MSMO1|MVD|SAMD8|SCD|STARD4	15	50	1055	18398	3	4.16359e-05	m4	top.enriched
biosynthetic process (GO:0009058)	biological_process	CBD - 10-12GW - DOWN	ACAT2|ACLY|ACTN1|DACT1|DDAH2|DHCR7|EBP|ENC1|EPHX2|ERG28|EXTL2|FADS2|FBXO5|FDFT1|FDPS|H4C3|HMGCR|HMGCS1|HYAL2|IDI1|IGFBP7|LPIN1|MAPK8IP1|MSMO1|MVD|NSDHL|SAMD8|SC5D|SCD|SQLE|STARD4|TM7SF2|TSHZ1|ZNF239|ZNF626	35	50	6173	18398	17	7.9431e-05	m5	top.enriched
organic cyclic compound biosynthetic process (GO:1901362)	biological_process	CBD - 10-12GW - DOWN	ACAT2|ACLY|ACTN1|DACT1|DHCR7|EBP|ERG28|FBXO5|FDFT1|FDPS|H4C3|HMGCR|HMGCS1|HYAL2|IDI1|IGFBP7|LPIN1|MAPK8IP1|MSMO1|MVD|NSDHL|SC5D|SCD|SQLE|STARD4|TM7SF2|TSHZ1|ZNF239|ZNF626	29	50	4323	18398	12	8.74341e-05	m5	enriched
organic substance biosynthetic process (GO:1901576)	biological_process	CBD - 10-12GW - DOWN	ACAT2|ACLY|ACTN1|DACT1|DHCR7|EBP|ENC1|EPHX2|ERG28|EXTL2|FADS2|FBXO5|FDFT1|FDPS|H4C3|HMGCR|HMGCS1|HYAL2|IDI1|IGFBP7|LPIN1|MAPK8IP1|MSMO1|MVD|NSDHL|SAMD8|SC5D|SCD|SQLE|STARD4|TM7SF2|TSHZ1|ZNF239|ZNF626	34	50	6091	18398	17	0.000225958	m5	enriched
organic cyclic compound metabolic process (GO:1901360)	biological_process	CBD - 10-12GW - DOWN	ACAT2|ACLY|ACTN1|CETN2|DACT1|DHCR7|EBP|EPHX2|ERG28|EXTL2|FBXO5|FDFT1|FDPS|H4C3|HMGCR|HMGCS1|HYAL2|IDI1|IGFBP7|LPIN1|MAPK8IP1|MSMO1|MVD|NSDHL|SC5D|SCD|SQLE|STARD4|TM7SF2|TSHZ1|ZNF239|ZNF626	32	50	6561	18398	18	0.0170989	m5	enriched
regulation of biosynthetic process (GO:0009889)	biological_process	CBD - 10-12GW - DOWN	ACTN1|DACT1|DDAH2|DHCR7|ENC1|FBXO5|FDFT1|FDPS|H4C3|HMGCR|HMGCS1|HYAL2|IDI1|IGFBP7|LPIN1|MAPK8IP1|MVD|SAMD8|SC5D|SCD|SQLE|STARD4|TM7SF2|TSHZ1|ZNF239|ZNF626	26	50	4234	18398	12	0.00352532	m6	top.enriched
fatty acid metabolic process (GO:0006631)	biological_process	CBD - 10-12GW - DOWN	ACAT2|ACLY|EPHX2|FADS2|LPIN1|MSMO1|SCD	7	50	391	18398	1	0.0306882	m7	top.enriched
oxidoreductase activity, acting on paired donors, with oxidation of a pair of donors resulting in the reduction of molecular oxygen to two molecules of water (GO:0016717)	molecular_function	CBD - 10-12GW - DOWN	FADS2|SC5D|SCD	3	52	5	18051	0	0.00106781	NA	enriched
oxidoreductase activity (GO:0016491)	molecular_function	CBD - 10-12GW - DOWN	DHCR7|ENOX2|FADS2|HBE1|HMGCR|MSMO1|NSDHL|SC5D|SCD|SQLE|TM7SF2	11	52	733	18051	2	0.0143892	NA	enriched
endoplasmic reticulum membrane (GO:0005789)	cellular_component	CBD - 10-12GW - DOWN	DHCR7|EBP|ERG28|EXTL2|FADS2|FDFT1|HMGCR|LPIN1|MAPK8IP1|MSMO1|NSDHL|SAMD8|SC5D|SCD|SQLE|TM7SF2|TMEM97	17	50	1113	19014	3	1.35251e-06	m1	top.enriched
endoplasmic reticulum subcompartment (GO:0098827)	cellular_component	CBD - 10-12GW - DOWN	DHCR7|EBP|ERG28|EXTL2|FADS2|FDFT1|HMGCR|LPIN1|MAPK8IP1|MSMO1|NSDHL|SAMD8|SC5D|SCD|SQLE|TM7SF2|TMEM97	17	50	1117	19014	3	1.35251e-06	m1	enriched
nuclear outer membrane-endoplasmic reticulum membrane network (GO:0042175)	cellular_component	CBD - 10-12GW - DOWN	DHCR7|EBP|ERG28|EXTL2|FADS2|FDFT1|HMGCR|LPIN1|MAPK8IP1|MSMO1|NSDHL|SAMD8|SC5D|SCD|SQLE|TM7SF2|TMEM97	17	50	1134	19014	3	1.35251e-06	m1	enriched
endoplasmic reticulum (GO:0005783)	cellular_component	CBD - 10-12GW - DOWN	DHCR7|EBP|ERG28|EXTL2|FADS2|FDFT1|HMGCR|HYAL2|IGFBP7|LPIN1|MAPK8IP1|MSMO1|NSDHL|SAMD8|SC5D|SCD|SQLE|STARD4|TM7SF2|TMEM97	20	50	1951	19014	5	1.56415e-05	m2	top.enriched
organelle subcompartment (GO:0031984)	cellular_component	CBD - 10-12GW - DOWN	COG4|DHCR7|EBP|ERG28|EXTL2|FADS2|FDFT1|HMGCR|HYAL2|LPIN1|MAPK8IP1|MSMO1|NSDHL|SAMD8|SC5D|SCD|SQLE|TM7SF2|TMEM97	19	50	1763	19014	5	1.56415e-05	m3	top.enriched
endomembrane system (GO:0012505)	cellular_component	CBD - 10-12GW - DOWN	ACLY|ACTN1|BST1|CETN2|COG4|DHCR7|EBP|ERG28|EXTL2|FADS2|FDFT1|HMGCR|HYAL2|IGFBP7|LPIN1|MAPK8IP1|MSMO1|NSDHL|SAMD8|SC5D|SCD|SQLE|STARD4|TM7SF2|TMEM97	25	50	4578	19014	12	0.0205127	m4	top.enriched
organelle membrane (GO:0031090)	cellular_component	CBD - 10-12GW - DOWN	BST1|COG4|DHCR7|EBP|ERG28|EXTL2|FADS2|FDFT1|HMGCR|HYAL2|LPIN1|MAPK8IP1|MSMO1|NSDHL|SAMD8|SC5D|SCD|SLC25A20|SQLE|TM7SF2|TMEM97	21	50	3547	19014	9	0.0321403	m5	top.enriched
hsa00100 Steroid biosynthesis	kegg_pathway	CBD - 10-12GW - DOWN	DHCR7|EBP|FDFT1|MSMO1|NSDHL|SC5D|SQLE|TM7SF2	8	31	20	8046	0	7.482e-13	NA	enriched
hsa00900 Terpenoid backbone biosynthesis	kegg_pathway	CBD - 10-12GW - DOWN	ACAT2|FDPS|HMGCR|HMGCS1|IDI1|MVD	6	31	22	8046	0	2.35813e-08	NA	enriched
hsa01100 Metabolic pathways	kegg_pathway	CBD - 10-12GW - DOWN	ACAT2|ACLY|BST1|DHCR7|EBP|EPHX2|EXTL2|FADS2|FDFT1|FDPS|HMGCR|HMGCS1|HYAL2|IDI1|LPIN1|MSMO1|MVD|NSDHL|SC5D|SCD|SQLE|TM7SF2	22	31	1526	8046	6	4.42232e-08	NA	enriched
Cholesterol metabolism with Bloch and Kandutsch-Russell pathways (WP4718)	WikiPathways	CBD - 10-12GW - DOWN	ACAT2|DHCR7|EBP|FADS2|FDFT1|FDPS|HMGCR|HMGCS1|IDI1|MSMO1|MVD|NSDHL|SC5D|SCD|SQLE|TM7SF2	16	42	47	12535	0	1.81479e-26	m1	top.enriched
Cholesterol synthesis disorders (WP5193)	WikiPathways	CBD - 10-12GW - DOWN	DHCR7|EBP|FDFT1|FDPS|HMGCR|HMGCS1|IDI1|MSMO1|MVD|SC5D|SQLE	11	42	18	12535	0	1.01119e-21	m2	top.enriched
Cholesterol biosynthesis (WP1795)	WikiPathways	CBD - 10-12GW - DOWN	ACAT2|DHCR7|EBP|FDFT1|FDPS|HMGCS1|IDI1|MSMO1|MVD|NSDHL|SC5D|SQLE|TM7SF2	13	42	24	12535	0	1.39997e-24	m2	enriched
Cholesterol biosynthesis pathway (WP197)	WikiPathways	CBD - 10-12GW - DOWN	DHCR7|FDFT1|FDPS|HMGCR|HMGCS1|IDI1|MSMO1|MVD|NSDHL|SC5D|SQLE	11	42	15	12535	0	5.24023e-23	m2	enriched
Cholesterol biosynthesis pathway. (WP5226)	WikiPathways	CBD - 10-12GW - DOWN	DHCR7|FDFT1|FDPS|HMGCR|HMGCS1|IDI1|MSMO1|MVD|NSDHL|SC5D|SQLE	11	42	15	12535	0	5.24023e-23	m2	enriched
WikiPathways Academy: wp-publish test (WP3917)	WikiPathways	CBD - 10-12GW - DOWN	DHCR7|FDFT1|FDPS|HMGCR|HMGCS1|IDI1|MSMO1|MVD|NSDHL|SC5D|SQLE	11	42	15	12535	0	5.24023e-23	m2	enriched
WikiPathways Academy: met-1-last (WP3907)	WikiPathways	CBD - 10-12GW - DOWN	FDFT1|FDPS|HMGCR|HMGCS1|IDI1|MSMO1|MVD|NSDHL|SC5D|SQLE	10	42	14	12535	0	1.07413e-20	m2	enriched
Activation of gene expression by SREBF (SREBP) (WP2706)	WikiPathways	CBD - 10-12GW - DOWN	DHCR7|FDFT1|FDPS|HMGCR|HMGCS1|IDI1|MVD|SC5D|SCD|SQLE|TM7SF2	11	42	41	12535	0	7.14557e-17	m2	enriched
WikiPathways Academy: met-1-indirect (WP3909)	WikiPathways	CBD - 10-12GW - DOWN	FDFT1|FDPS|HMGCR|HMGCS1|IDI1|MVD|SQLE	7	42	10	12535	0	4.521e-14	m3	top.enriched
Cholesterol biosynthesis, regulation and transport (WP4281)	WikiPathways	CBD - 10-12GW - DOWN	ACAT2|DHCR7|FDFT1|FDPS|HMGCS1|IDI1|MVD|SQLE	8	42	11	12535	0	1.92985e-16	m3	enriched
Mevalonate arm of cholesterol biosynthesis pathway (WP4190)	WikiPathways	CBD - 10-12GW - DOWN	ACAT2|FDFT1|FDPS|HMGCR|HMGCS1|IDI1|MVD	7	42	13	12535	0	5.8343e-13	m3	enriched
Sterol regulatory element-binding proteins (SREBP) signaling (WP1982)	WikiPathways	CBD - 10-12GW - DOWN	ACLY|FDFT1|FDPS|HMGCR|HMGCS1|IDI1|LPIN1|MVD|SCD|SQLE	10	42	71	12535	0	2.5309e-12	m3	enriched
Mevalonate pathway (WP3963)	WikiPathways	CBD - 10-12GW - DOWN	ACAT2|FDPS|HMGCR|HMGCS1|MVD	5	42	7	12535	0	7.19021e-10	m3	enriched
WikiPathways Tutorial: demo_step3 (WP3539)	WikiPathways	CBD - 10-12GW - DOWN	FDFT1|HMGCR|SQLE	3	42	4	12535	0	1.26101e-05	m4	top.enriched
Demo_complete (WP3418)	WikiPathways	CBD - 10-12GW - DOWN	FDFT1|HMGCR|SQLE	3	42	6	12535	0	5.88341e-05	m4	enriched
SREBF and miR33 in cholesterol and lipid homeostasis (WP2011)	WikiPathways	CBD - 10-12GW - DOWN	HMGCR|HMGCS1|SCD	3	42	18	12535	0	0.00207476	m4	enriched
Statin inhibition of cholesterol production (WP430)	WikiPathways	CBD - 10-12GW - DOWN	FDFT1|HMGCR|SQLE	3	42	31	12535	0	0.00950373	m4	enriched
Cholesterol biosynthesis with skeletal dysplasias (WP4804)	WikiPathways	CBD - 10-12GW - DOWN	DHCR7|EBP|NSDHL|SC5D	4	42	7	12535	0	3.66086e-07	m5	top.enriched
7-oxo-C and 7-beta-HC pathways (WP5064)	WikiPathways	CBD - 10-12GW - DOWN	DHCR7|EBP|EPHX2	3	42	27	12535	0	0.00689931	m5	enriched
Oxysterols derived from cholesterol (WP4545)	WikiPathways	CBD - 10-12GW - DOWN	DHCR7|EBP|EPHX2	3	42	46	12535	0	0.0295842	m5	enriched
regulation of cholesterol biosynthetic process (GO:0045540)	biological_process	THC - 10-12GW - DOWN	ELOVL6|FDPS|HMGCS1|IDI1|SCD	5	21	48	18398	0	1.54021e-05	m1	top.enriched
regulation of sterol biosynthetic process (GO:0106118)	biological_process	THC - 10-12GW - DOWN	ELOVL6|FDPS|HMGCS1|IDI1|SCD	5	21	48	18398	0	1.54021e-05	m2	top.enriched
regulation of cholesterol metabolic process (GO:0090181)	biological_process	THC - 10-12GW - DOWN	ELOVL6|FDPS|HMGCS1|IDI1|SCD	5	21	61	18398	0	3.53398e-05	m3	top.enriched
cholesterol biosynthetic process (GO:0006695)	biological_process	THC - 10-12GW - DOWN	ELOVL6|FDPS|HMGCS1|IDI1|SCD	5	21	72	18398	0	4.94717e-05	m4	top.enriched
secondary alcohol biosynthetic process (GO:1902653)	biological_process	THC - 10-12GW - DOWN	ELOVL6|FDPS|HMGCS1|IDI1|SCD	5	21	72	18398	0	4.94717e-05	m4	enriched
regulation of alcohol biosynthetic process (GO:1902930)	biological_process	THC - 10-12GW - DOWN	ELOVL6|FDPS|HMGCS1|IDI1|SCD	5	21	75	18398	0	5.07445e-05	m4	enriched
sterol biosynthetic process (GO:0016126)	biological_process	THC - 10-12GW - DOWN	ELOVL6|FDPS|HMGCS1|IDI1|SCD	5	21	78	18398	0	5.30861e-05	m4	enriched
regulation of steroid biosynthetic process (GO:0050810)	biological_process	THC - 10-12GW - DOWN	ELOVL6|FDPS|HMGCS1|IDI1|SCD	5	21	91	18398	0	0.000101361	m4	enriched
regulation of steroid metabolic process (GO:0019218)	biological_process	THC - 10-12GW - DOWN	ELOVL6|FDPS|HMGCS1|IDI1|SCD	5	21	122	18398	0	0.000392653	m4	enriched
cholesterol metabolic process (GO:0008203)	biological_process	THC - 10-12GW - DOWN	ELOVL6|FDPS|HMGCS1|IDI1|SCD	5	21	149	18398	0	0.000955983	m4	enriched
alcohol biosynthetic process (GO:0046165)	biological_process	THC - 10-12GW - DOWN	ELOVL6|FDPS|HMGCS1|IDI1|SCD	5	21	155	18398	0	0.00105691	m4	enriched
secondary alcohol metabolic process (GO:1902652)	biological_process	THC - 10-12GW - DOWN	ELOVL6|FDPS|HMGCS1|IDI1|SCD	5	21	158	18398	0	0.0010653	m4	enriched
sterol metabolic process (GO:0016125)	biological_process	THC - 10-12GW - DOWN	ELOVL6|FDPS|HMGCS1|IDI1|SCD	5	21	165	18398	0	0.00121848	m4	enriched
steroid biosynthetic process (GO:0006694)	biological_process	THC - 10-12GW - DOWN	ELOVL6|FDPS|HMGCS1|IDI1|SCD	5	21	190	18398	0	0.00226776	m4	enriched
regulation of lipid biosynthetic process (GO:0046890)	biological_process	THC - 10-12GW - DOWN	ELOVL6|FDPS|HMGCS1|IDI1|SCD	5	21	203	18398	0	0.00292899	m4	enriched
organic hydroxy compound biosynthetic process (GO:1901617)	biological_process	THC - 10-12GW - DOWN	ELOVL6|FDPS|HMGCS1|IDI1|SCD	5	21	250	18398	0	0.00638951	m4	enriched
steroid metabolic process (GO:0008202)	biological_process	THC - 10-12GW - DOWN	ELOVL6|FDPS|HMGCS1|IDI1|SCD	5	21	328	18398	0	0.0204598	m4	enriched
alcohol metabolic process (GO:0006066)	biological_process	THC - 10-12GW - DOWN	ELOVL6|FDPS|HMGCS1|IDI1|SCD	5	21	372	18398	0	0.0356897	m4	enriched
regulation of lipid metabolic process (GO:0019216)	biological_process	THC - 10-12GW - DOWN	ELOVL6|FDPS|HMGCS1|IDI1|SCD	5	21	402	18398	0	0.04941	m4	enriched
isoprenoid biosynthetic process (GO:0008299)	biological_process	THC - 10-12GW - DOWN	FDPS|HMGCS1|IDI1	3	21	28	18398	0	0.00412561	m5	top.enriched
regulation of primary metabolic process (GO:0080090)	biological_process	THC - 10-12GW - DOWN	ACTB|BIRC5|CLSPN|ELOVL6|ENC1|FANCD2|FDPS|GPC3|HMGCS1|HNRNPL|IDI1|ITGB3|PDGFC|SCD|TXNIP|WFDC1|ZNF709	17	21	5917	18398	7	0.00553348	m6	top.enriched
isoprenoid metabolic process (GO:0006720)	biological_process	THC - 10-12GW - DOWN	FDPS|GPC3|HMGCS1|IDI1	4	21	143	18398	0	0.0144097	m7	top.enriched
hsa00900 Terpenoid backbone biosynthesis	kegg_pathway	THC - 10-12GW - DOWN	FDPS|HMGCS1|IDI1	3	13	22	8046	0	0.00168031	NA	enriched
Activation of gene expression by SREBF (SREBP) (WP2706)	WikiPathways	THC - 10-12GW - DOWN	ELOVL6|FDPS|HMGCS1|IDI1|SCD	5	19	41	12535	0	4.43086e-06	m1	top.enriched
WikiPathways Academy: met-1-indirect (WP3909)	WikiPathways	THC - 10-12GW - DOWN	FDPS|HMGCS1|IDI1	3	19	10	12535	0	0.00019995	m2	top.enriched
WikiPathways Academy: met-1-last (WP3907)	WikiPathways	THC - 10-12GW - DOWN	FDPS|HMGCS1|IDI1	3	19	14	12535	0	0.00019995	m2	enriched
Cholesterol biosynthesis pathway (WP197)	WikiPathways	THC - 10-12GW - DOWN	FDPS|HMGCS1|IDI1	3	19	15	12535	0	0.00019995	m2	enriched
Cholesterol biosynthesis pathway. (WP5226)	WikiPathways	THC - 10-12GW - DOWN	FDPS|HMGCS1|IDI1	3	19	15	12535	0	0.00019995	m2	enriched
WikiPathways Academy: wp-publish test (WP3917)	WikiPathways	THC - 10-12GW - DOWN	FDPS|HMGCS1|IDI1	3	19	15	12535	0	0.00019995	m2	enriched
Cholesterol synthesis disorders (WP5193)	WikiPathways	THC - 10-12GW - DOWN	FDPS|HMGCS1|IDI1	3	19	18	12535	0	0.000321806	m2	enriched
Cholesterol biosynthesis (WP1795)	WikiPathways	THC - 10-12GW - DOWN	FDPS|HMGCS1|IDI1	3	19	24	12535	0	0.000661359	m2	enriched
Cholesterol biosynthesis, regulation and transport (WP4281)	WikiPathways	THC - 10-12GW - DOWN	FDPS|HMGCS1|IDI1	3	19	11	12535	0	0.00019995	m2	enriched
Mevalonate arm of cholesterol biosynthesis pathway (WP4190)	WikiPathways	THC - 10-12GW - DOWN	FDPS|HMGCS1|IDI1	3	19	13	12535	0	0.00019995	m2	enriched
Cholesterol metabolism with Bloch and Kandutsch-Russell pathways (WP4718)	WikiPathways	THC - 10-12GW - DOWN	FDPS|HMGCS1|IDI1|SCD	4	19	47	12535	0	0.00019995	m3	top.enriched
Sterol regulatory element-binding proteins (SREBP) signaling (WP1982)	WikiPathways	THC - 10-12GW - DOWN	FDPS|HMGCS1|IDI1|SCD	4	19	71	12535	0	0.00042311	m4	top.enriched
detoxification of copper ion (GO:0010273)	biological_process	CBD-THC - 10-12GW - UP	MT1E|MT1F|MT1G|MT1X	4	16	15	18398	0	4.14403e-06	m1	top.enriched
stress response to copper ion (GO:1990169)	biological_process	CBD-THC - 10-12GW - UP	MT1E|MT1F|MT1G|MT1X	4	16	15	18398	0	4.14403e-06	m2	top.enriched
cellular response to copper ion (GO:0071280)	biological_process	CBD-THC - 10-12GW - UP	MT1E|MT1F|MT1G|MT1X	4	16	28	18398	0	2.058e-05	m2	enriched
cellular response to cadmium ion (GO:0071276)	biological_process	CBD-THC - 10-12GW - UP	MT1E|MT1F|MT1G|MT1X	4	16	38	18398	0	5.47706e-05	m2	enriched
cellular zinc ion homeostasis (GO:0006882)	biological_process	CBD-THC - 10-12GW - UP	MT1E|MT1F|MT1G|MT1X	4	16	38	18398	0	5.47706e-05	m2	enriched
response to copper ion (GO:0046688)	biological_process	CBD-THC - 10-12GW - UP	MT1E|MT1F|MT1G|MT1X	4	16	40	18398	0	5.47706e-05	m2	enriched
zinc ion homeostasis (GO:0055069)	biological_process	CBD-THC - 10-12GW - UP	MT1E|MT1F|MT1G|MT1X	4	16	40	18398	0	5.47706e-05	m2	enriched
response to zinc ion (GO:0010043)	biological_process	CBD-THC - 10-12GW - UP	MT1E|MT1F|MT1G|MT1X	4	16	57	18398	0	0.000180491	m2	enriched
response to cadmium ion (GO:0046686)	biological_process	CBD-THC - 10-12GW - UP	MT1E|MT1F|MT1G|MT1X	4	16	60	18398	0	0.000206575	m2	enriched
detoxification (GO:0098754)	biological_process	CBD-THC - 10-12GW - UP	MT1E|MT1F|MT1G|MT1X	4	16	136	18398	0	0.00518046	m2	enriched
cellular response to metal ion (GO:0071248)	biological_process	CBD-THC - 10-12GW - UP	MT1E|MT1F|MT1G|MT1X	4	16	188	18398	0	0.0139782	m2	enriched
cellular response to inorganic substance (GO:0071241)	biological_process	CBD-THC - 10-12GW - UP	MT1E|MT1F|MT1G|MT1X	4	16	215	18398	0	0.020582	m2	enriched
response to toxic substance (GO:0009636)	biological_process	CBD-THC - 10-12GW - UP	MT1E|MT1F|MT1G|MT1X	4	16	236	18398	0	0.0252377	m2	enriched
negative regulation of growth (GO:0045926)	biological_process	CBD-THC - 10-12GW - UP	MT1E|MT1F|MT1G|MT1X	4	16	245	18398	0	0.0271888	m2	enriched
detoxification of inorganic compound (GO:0061687)	biological_process	CBD-THC - 10-12GW - UP	MT1E|MT1F|MT1G|MT1X	4	16	17	18398	0	4.63769e-06	m3	top.enriched
stress response to metal ion (GO:0097501)	biological_process	CBD-THC - 10-12GW - UP	MT1E|MT1F|MT1G|MT1X	4	16	18	18398	0	4.63769e-06	m4	top.enriched
cellular response to zinc ion (GO:0071294)	biological_process	CBD-THC - 10-12GW - UP	MT1E|MT1F|MT1G|MT1X	4	16	24	18398	0	1.28434e-05	m5	top.enriched
cellular transition metal ion homeostasis (GO:0046916)	biological_process	CBD-THC - 10-12GW - UP	FTL|MT1E|MT1F|MT1G|MT1X	5	16	117	18398	0	5.73825e-05	m6	top.enriched
transition metal ion homeostasis (GO:0055076)	biological_process	CBD-THC - 10-12GW - UP	FTL|MT1E|MT1F|MT1G|MT1X	5	16	138	18398	0	0.000120414	m6	enriched
cellular metal ion homeostasis (GO:0006875)	biological_process	CBD-THC - 10-12GW - UP	DDIT3|FTL|MT1E|MT1F|MT1G|MT1X	6	16	572	18398	0	0.00540431	m7	top.enriched
metal ion homeostasis (GO:0055065)	biological_process	CBD-THC - 10-12GW - UP	DDIT3|FTL|MT1E|MT1F|MT1G|MT1X	6	16	644	18398	1	0.0100397	m7	enriched
cellular cation homeostasis (GO:0030003)	biological_process	CBD-THC - 10-12GW - UP	DDIT3|FTL|MT1E|MT1F|MT1G|MT1X	6	16	652	18398	1	0.0101749	m7	enriched
cellular ion homeostasis (GO:0006873)	biological_process	CBD-THC - 10-12GW - UP	DDIT3|FTL|MT1E|MT1F|MT1G|MT1X	6	16	665	18398	1	0.0107893	m7	enriched
cation homeostasis (GO:0055080)	biological_process	CBD-THC - 10-12GW - UP	DDIT3|FTL|MT1E|MT1F|MT1G|MT1X	6	16	727	18398	1	0.0162092	m7	enriched
inorganic ion homeostasis (GO:0098771)	biological_process	CBD-THC - 10-12GW - UP	DDIT3|FTL|MT1E|MT1F|MT1G|MT1X	6	16	737	18398	1	0.0167185	m7	enriched
ion homeostasis (GO:0050801)	biological_process	CBD-THC - 10-12GW - UP	DDIT3|FTL|MT1E|MT1F|MT1G|MT1X	6	16	784	18398	1	0.0217392	m7	enriched
cellular chemical homeostasis (GO:0055082)	biological_process	CBD-THC - 10-12GW - UP	DDIT3|FTL|MT1E|MT1F|MT1G|MT1X	6	16	808	18398	1	0.0246041	m7	enriched
cellular homeostasis (GO:0019725)	biological_process	CBD-THC - 10-12GW - UP	DDIT3|FTL|MT1E|MT1F|MT1G|MT1X	6	16	934	18398	1	0.046398	m7	enriched
cellular divalent inorganic cation homeostasis (GO:0072503)	biological_process	CBD-THC - 10-12GW - UP	DDIT3|MT1E|MT1F|MT1G|MT1X	5	16	478	18398	0	0.0246041	m8	top.enriched
divalent inorganic cation homeostasis (GO:0072507)	biological_process	CBD-THC - 10-12GW - UP	DDIT3|MT1E|MT1F|MT1G|MT1X	5	16	497	18398	0	0.0271888	m8	enriched
hsa04978 Mineral absorption	kegg_pathway	CBD-THC - 10-12GW - UP	FTL|MT1E|MT1F|MT1G|MT1X	5	10	60	8046	0	1.60603e-06	NA	enriched
Metallothioneins bind metals (WP3814)	WikiPathways	CBD-THC - 10-12GW - UP	MT1E|MT1F|MT1G|MT1X	4	13	11	12535	0	3.09695e-07	NA	enriched
Zinc homeostasis (WP3529)	WikiPathways	CBD-THC - 10-12GW - UP	MT1E|MT1F|MT1G|MT1X	4	13	37	12535	0	3.05305e-05	NA	enriched
Copper homeostasis (WP3286)	WikiPathways	CBD-THC - 10-12GW - UP	MT1E|MT1F|MT1G|MT1X	4	13	54	12535	0	9.65127e-05	NA	enriched
sterol biosynthetic process (GO:0016126)	biological_process	CBD-THC - 10-12GW - DOWN	EBP|ERG28|FDPS|HMGCR|IDI1|MSMO1|NSDHL	7	17	78	18398	0	5.62473e-09	m1	top.enriched
secondary alcohol biosynthetic process (GO:1902653)	biological_process	CBD-THC - 10-12GW - DOWN	EBP|FDPS|HMGCR|IDI1|MSMO1|NSDHL	6	17	72	18398	0	1.85382e-07	m2	top.enriched
alcohol biosynthetic process (GO:0046165)	biological_process	CBD-THC - 10-12GW - DOWN	EBP|FDPS|HMGCR|IDI1|MSMO1|NSDHL	6	17	155	18398	0	7.42714e-06	m2	enriched
secondary alcohol metabolic process (GO:1902652)	biological_process	CBD-THC - 10-12GW - DOWN	EBP|FDPS|HMGCR|IDI1|MSMO1|NSDHL	6	17	158	18398	0	7.42714e-06	m2	enriched
alcohol metabolic process (GO:0006066)	biological_process	CBD-THC - 10-12GW - DOWN	EBP|FDPS|HMGCR|IDI1|MSMO1|NSDHL	6	17	372	18398	0	0.00089785	m2	enriched
small molecule biosynthetic process (GO:0044283)	biological_process	CBD-THC - 10-12GW - DOWN	EBP|FDPS|HMGCR|IDI1|MSMO1|NSDHL	6	17	687	18398	1	0.0194399	m2	enriched
cholesterol biosynthetic process (GO:0006695)	biological_process	CBD-THC - 10-12GW - DOWN	EBP|FDPS|HMGCR|IDI1|MSMO1|NSDHL	6	17	72	18398	0	1.85382e-07	m2	enriched
cholesterol metabolic process (GO:0008203)	biological_process	CBD-THC - 10-12GW - DOWN	EBP|FDPS|HMGCR|IDI1|MSMO1|NSDHL	6	17	149	18398	0	6.70818e-06	m2	enriched
sterol metabolic process (GO:0016125)	biological_process	CBD-THC - 10-12GW - DOWN	EBP|ERG28|FDPS|HMGCR|IDI1|MSMO1|NSDHL	7	17	165	18398	0	2.96485e-07	m3	top.enriched
steroid biosynthetic process (GO:0006694)	biological_process	CBD-THC - 10-12GW - DOWN	EBP|ERG28|FDPS|HMGCR|IDI1|MSMO1|NSDHL	7	17	190	18398	0	6.4008e-07	m3	enriched
organic hydroxy compound biosynthetic process (GO:1901617)	biological_process	CBD-THC - 10-12GW - DOWN	EBP|ERG28|FDPS|HMGCR|IDI1|MSMO1|NSDHL	7	17	250	18398	0	3.63585e-06	m3	enriched
steroid metabolic process (GO:0008202)	biological_process	CBD-THC - 10-12GW - DOWN	EBP|ERG28|FDPS|HMGCR|IDI1|MSMO1|NSDHL	7	17	328	18398	0	1.43482e-05	m3	enriched
organic hydroxy compound metabolic process (GO:1901615)	biological_process	CBD-THC - 10-12GW - DOWN	EBP|ERG28|FDPS|HMGCR|IDI1|MSMO1|NSDHL	7	17	554	18398	1	0.000470733	m3	enriched
lipid biosynthetic process (GO:0008610)	biological_process	CBD-THC - 10-12GW - DOWN	EBP|ERG28|FDPS|HMGCR|IDI1|MSMO1|NSDHL	7	17	726	18398	1	0.00242052	m3	enriched
isoprenoid biosynthetic process (GO:0008299)	biological_process	CBD-THC - 10-12GW - DOWN	FDPS|HMGCR|IDI1	3	17	28	18398	0	0.00242052	m4	top.enriched
regulation of cholesterol biosynthetic process (GO:0045540)	biological_process	CBD-THC - 10-12GW - DOWN	FDPS|HMGCR|IDI1	3	17	48	18398	0	0.011055	m4	enriched
regulation of sterol biosynthetic process (GO:0106118)	biological_process	CBD-THC - 10-12GW - DOWN	FDPS|HMGCR|IDI1	3	17	48	18398	0	0.011055	m4	enriched
regulation of cholesterol metabolic process (GO:0090181)	biological_process	CBD-THC - 10-12GW - DOWN	FDPS|HMGCR|IDI1	3	17	61	18398	0	0.0194399	m4	enriched
regulation of alcohol biosynthetic process (GO:1902930)	biological_process	CBD-THC - 10-12GW - DOWN	FDPS|HMGCR|IDI1	3	17	75	18398	0	0.0339993	m4	enriched
lipid metabolic process (GO:0006629)	biological_process	CBD-THC - 10-12GW - DOWN	EBP|ERG28|FDPS|HADH|HMGCR|IDI1|MSMO1|NSDHL	8	17	1423	18398	1	0.015258	m5	top.enriched
endoplasmic reticulum membrane (GO:0005789)	cellular_component	CBD-THC - 10-12GW - DOWN	EBP|ERG28|FATE1|HMGCR|MSMO1|NSDHL|TMEM98	7	18	1113	19014	1	0.030925	NA	enriched
endoplasmic reticulum subcompartment (GO:0098827)	cellular_component	CBD-THC - 10-12GW - DOWN	EBP|ERG28|FATE1|HMGCR|MSMO1|NSDHL|TMEM98	7	18	1117	19014	1	0.030925	NA	enriched
nuclear outer membrane-endoplasmic reticulum membrane network (GO:0042175)	cellular_component	CBD-THC - 10-12GW - DOWN	EBP|ERG28|FATE1|HMGCR|MSMO1|NSDHL|TMEM98	7	18	1134	19014	1	0.030925	NA	enriched
hsa00100 Steroid biosynthesis	kegg_pathway	CBD-THC - 10-12GW - DOWN	EBP|MSMO1|NSDHL	3	10	20	8046	0	0.000354392	NA	enriched
hsa00900 Terpenoid backbone biosynthesis	kegg_pathway	CBD-THC - 10-12GW - DOWN	FDPS|HMGCR|IDI1	3	10	22	8046	0	0.000354392	NA	enriched
Cholesterol biosynthesis pathway (WP197)	WikiPathways	CBD-THC - 10-12GW - DOWN	FDPS|HMGCR|IDI1|MSMO1|NSDHL	5	14	15	12535	0	7.85604e-10	m1	top.enriched
Cholesterol biosynthesis pathway. (WP5226)	WikiPathways	CBD-THC - 10-12GW - DOWN	FDPS|HMGCR|IDI1|MSMO1|NSDHL	5	14	15	12535	0	7.85604e-10	m1	enriched
WikiPathways Academy: met-1-last (WP3907)	WikiPathways	CBD-THC - 10-12GW - DOWN	FDPS|HMGCR|IDI1|MSMO1|NSDHL	5	14	14	12535	0	7.85604e-10	m1	enriched
WikiPathways Academy: wp-publish test (WP3917)	WikiPathways	CBD-THC - 10-12GW - DOWN	FDPS|HMGCR|IDI1|MSMO1|NSDHL	5	14	15	12535	0	7.85604e-10	m1	enriched
Cholesterol metabolism with Bloch and Kandutsch-Russell pathways (WP4718)	WikiPathways	CBD-THC - 10-12GW - DOWN	EBP|FDPS|HMGCR|IDI1|MSMO1|NSDHL	6	14	47	12535	0	1.49161e-09	m2	top.enriched
Cholesterol synthesis disorders (WP5193)	WikiPathways	CBD-THC - 10-12GW - DOWN	EBP|FDPS|HMGCR|IDI1|MSMO1	5	14	18	12535	0	1.49161e-09	m3	top.enriched
Cholesterol biosynthesis (WP1795)	WikiPathways	CBD-THC - 10-12GW - DOWN	EBP|FDPS|IDI1|MSMO1|NSDHL	5	14	24	12535	0	6.31973e-09	m4	top.enriched
WikiPathways Academy: met-1-indirect (WP3909)	WikiPathways	CBD-THC - 10-12GW - DOWN	FDPS|HMGCR|IDI1	3	14	10	12535	0	2.24394e-05	m5	top.enriched
Mevalonate arm of cholesterol biosynthesis pathway (WP4190)	WikiPathways	CBD-THC - 10-12GW - DOWN	FDPS|HMGCR|IDI1	3	14	13	12535	0	4.74445e-05	m5	enriched
Activation of gene expression by SREBF (SREBP) (WP2706)	WikiPathways	CBD-THC - 10-12GW - DOWN	FDPS|HMGCR|IDI1	3	14	41	12535	0	0.00156246	m5	enriched
Sterol regulatory element-binding proteins (SREBP) signaling (WP1982)	WikiPathways	CBD-THC - 10-12GW - DOWN	FDPS|HMGCR|IDI1	3	14	71	12535	0	0.00613106	m5	enriched
NRF2 pathway (WP2884)	WikiPathways	CBD-THC - 12-14GW - UP	FTL|SQSTM1|SRXN1|TXNRD1	4	16	143	12535	0	0.0360013	NA	enriched
sterol metabolic process (GO:0016125)	biological_process	CBD-THC - 12-14GW - DOWN	ACAT2|ERG28|FDFT1|FDPS|HMGCR|HMGCS1|IDI1|LDLR|MSMO1|SCD	10	21	165	18398	0	6.63028e-12	m1	top.enriched
organic hydroxy compound metabolic process (GO:1901615)	biological_process	CBD-THC - 12-14GW - DOWN	ACAT2|ERG28|FDFT1|FDPS|HMGCR|HMGCS1|IDI1|LDLR|MSMO1|SCD	10	21	554	18398	1	1.48125e-07	m1	enriched
sterol biosynthetic process (GO:0016126)	biological_process	CBD-THC - 12-14GW - DOWN	ACAT2|ERG28|FDFT1|FDPS|HMGCR|HMGCS1|IDI1|MSMO1|SCD	9	21	78	18398	0	1.24081e-12	m1	enriched
organic hydroxy compound biosynthetic process (GO:1901617)	biological_process	CBD-THC - 12-14GW - DOWN	ACAT2|ERG28|FDFT1|FDPS|HMGCR|HMGCS1|IDI1|MSMO1|SCD	9	21	250	18398	0	6.20552e-09	m1	enriched
steroid metabolic process (GO:0008202)	biological_process	CBD-THC - 12-14GW - DOWN	ACAT2|CYP17A1|ERG28|FDFT1|FDPS|HMGCR|HMGCS1|IDI1|LDLR|MSMO1|SCD	11	21	328	18398	0	3.9301e-11	m1	enriched
lipid biosynthetic process (GO:0008610)	biological_process	CBD-THC - 12-14GW - DOWN	ACAT2|CYP17A1|ERG28|FDFT1|FDPS|HMGCR|HMGCS1|IDI1|LDLR|MSMO1|SCD	11	21	726	18398	1	9.42656e-08	m1	enriched
cholesterol metabolic process (GO:0008203)	biological_process	CBD-THC - 12-14GW - DOWN	ACAT2|FDFT1|FDPS|HMGCR|HMGCS1|IDI1|LDLR|MSMO1|SCD	9	21	149	18398	0	7.2677e-11	m1	enriched
secondary alcohol metabolic process (GO:1902652)	biological_process	CBD-THC - 12-14GW - DOWN	ACAT2|FDFT1|FDPS|HMGCR|HMGCS1|IDI1|LDLR|MSMO1|SCD	9	21	158	18398	0	1.08778e-10	m1	enriched
alcohol metabolic process (GO:0006066)	biological_process	CBD-THC - 12-14GW - DOWN	ACAT2|FDFT1|FDPS|HMGCR|HMGCS1|IDI1|LDLR|MSMO1|SCD	9	21	372	18398	0	1.29934e-07	m1	enriched
steroid biosynthetic process (GO:0006694)	biological_process	CBD-THC - 12-14GW - DOWN	ACAT2|CYP17A1|ERG28|FDFT1|FDPS|HMGCR|HMGCS1|IDI1|MSMO1|SCD	10	21	190	18398	0	1.85504e-11	m1	enriched
cholesterol biosynthetic process (GO:0006695)	biological_process	CBD-THC - 12-14GW - DOWN	ACAT2|FDFT1|FDPS|HMGCR|HMGCS1|IDI1|MSMO1|SCD	8	21	72	18398	0	2.30477e-11	m1	enriched
secondary alcohol biosynthetic process (GO:1902653)	biological_process	CBD-THC - 12-14GW - DOWN	ACAT2|FDFT1|FDPS|HMGCR|HMGCS1|IDI1|MSMO1|SCD	8	21	72	18398	0	2.30477e-11	m1	enriched
alcohol biosynthetic process (GO:0046165)	biological_process	CBD-THC - 12-14GW - DOWN	ACAT2|FDFT1|FDPS|HMGCR|HMGCS1|IDI1|MSMO1|SCD	8	21	155	18398	0	6.283e-09	m1	enriched
lipid metabolic process (GO:0006629)	biological_process	CBD-THC - 12-14GW - DOWN	ACAT2|ALAS1|CYP17A1|ERG28|FDFT1|FDPS|GPC3|HMGCR|HMGCS1|IDI1|LDLR|MSMO1|SCD	13	21	1423	18398	2	3.38068e-07	m1	enriched
small molecule biosynthetic process (GO:0044283)	biological_process	CBD-THC - 12-14GW - DOWN	ACAT2|FDFT1|FDPS|HMGCR|HMGCS1|IDI1|MSMO1|PDE5A|SCD	9	21	687	18398	1	1.62124e-05	m1	enriched
cellular lipid metabolic process (GO:0044255)	biological_process	CBD-THC - 12-14GW - DOWN	ACAT2|FDFT1|FDPS|GPC3|HMGCR|HMGCS1|IDI1|LDLR|MSMO1|SCD	10	21	1055	18398	1	4.19618e-05	m1	enriched
regulation of lipid biosynthetic process (GO:0046890)	biological_process	CBD-THC - 12-14GW - DOWN	FDFT1|FDPS|HMGCR|HMGCS1|IDI1|LDLR|SCD	7	21	203	18398	0	1.46616e-06	m2	top.enriched
regulation of cholesterol biosynthetic process (GO:0045540)	biological_process	CBD-THC - 12-14GW - DOWN	FDFT1|FDPS|HMGCR|HMGCS1|IDI1|SCD	6	21	48	18398	0	1.60325e-08	m2	enriched
regulation of sterol biosynthetic process (GO:0106118)	biological_process	CBD-THC - 12-14GW - DOWN	FDFT1|FDPS|HMGCR|HMGCS1|IDI1|SCD	6	21	48	18398	0	1.60325e-08	m2	enriched
regulation of cholesterol metabolic process (GO:0090181)	biological_process	CBD-THC - 12-14GW - DOWN	FDFT1|FDPS|HMGCR|HMGCS1|IDI1|SCD	6	21	61	18398	0	6.63555e-08	m2	enriched
regulation of alcohol biosynthetic process (GO:1902930)	biological_process	CBD-THC - 12-14GW - DOWN	FDFT1|FDPS|HMGCR|HMGCS1|IDI1|SCD	6	21	75	18398	0	1.82218e-07	m2	enriched
regulation of steroid biosynthetic process (GO:0050810)	biological_process	CBD-THC - 12-14GW - DOWN	FDFT1|FDPS|HMGCR|HMGCS1|IDI1|SCD	6	21	91	18398	0	5.33685e-07	m2	enriched
regulation of steroid metabolic process (GO:0019218)	biological_process	CBD-THC - 12-14GW - DOWN	FDFT1|FDPS|HMGCR|HMGCS1|IDI1|SCD	6	21	122	18398	0	2.8651e-06	m2	enriched
regulation of small molecule metabolic process (GO:0062012)	biological_process	CBD-THC - 12-14GW - DOWN	FDFT1|FDPS|HMGCR|HMGCS1|IDI1|SCD	6	21	434	18398	0	0.00314922	m2	enriched
regulation of lipid metabolic process (GO:0019216)	biological_process	CBD-THC - 12-14GW - DOWN	ALAS1|FDFT1|FDPS|HMGCR|HMGCS1|IDI1|LDLR|SCD	8	21	402	18398	0	5.59797e-06	m2	enriched
isoprenoid metabolic process (GO:0006720)	biological_process	CBD-THC - 12-14GW - DOWN	FDFT1|FDPS|GPC3|HMGCR|HMGCS1|IDI1	6	21	143	18398	0	6.81007e-06	m2	enriched
isoprenoid biosynthetic process (GO:0008299)	biological_process	CBD-THC - 12-14GW - DOWN	FDPS|HMGCR|HMGCS1|IDI1	4	21	28	18398	0	1.61577e-05	m2	enriched
organophosphate metabolic process (GO:0019637)	biological_process	CBD-THC - 12-14GW - DOWN	FDFT1|FDPS|HMGCR|HMGCS1|IDI1|LDLR|PDE5A|RRM2|SCD	9	21	1016	18398	1	0.000371042	m2	enriched
farnesyl diphosphate metabolic process (GO:0045338)	biological_process	CBD-THC - 12-14GW - DOWN	FDFT1|FDPS|HMGCS1	3	21	5	18398	0	8.53858e-06	m3	top.enriched
terpenoid metabolic process (GO:0006721)	biological_process	CBD-THC - 12-14GW - DOWN	FDFT1|FDPS|GPC3|HMGCS1	4	21	124	18398	0	0.00478835	m3	enriched
phospholipid metabolic process (GO:0006644)	biological_process	CBD-THC - 12-14GW - DOWN	FDFT1|FDPS|HMGCS1|IDI1|LDLR	5	21	418	18398	0	0.0385391	m3	enriched
organic cyclic compound metabolic process (GO:1901360)	biological_process	CBD-THC - 12-14GW - DOWN	ACAT2|ACTA2|ALAS1|CYP17A1|ERG28|FDFT1|FDPS|GINS3|HMGCR|HMGCS1|IDI1|LDLR|MSMO1|PCLAF|PDE5A|RRM2|SCD|UTP4	18	21	6561	18398	7	0.00161378	m4	top.enriched
organic substance biosynthetic process (GO:1901576)	biological_process	CBD-THC - 12-14GW - DOWN	ACAT2|ACTA2|ALAS1|CYP17A1|ERG28|FDFT1|FDPS|GINS3|GPC3|HMGCR|HMGCS1|IDI1|LDLR|MSMO1|PCLAF|PDE5A|RRM2|SCD|UTP4	19	21	6091	18398	7	4.19618e-05	m4	enriched
biosynthetic process (GO:0009058)	biological_process	CBD-THC - 12-14GW - DOWN	ACAT2|ACTA2|ALAS1|CYP17A1|ERG28|FDFT1|FDPS|GINS3|GPC3|HMGCR|HMGCS1|IDI1|LDLR|MSMO1|PCLAF|PDE5A|RRM2|SCD|UTP4	19	21	6173	18398	7	5.16118e-05	m4	enriched
organic cyclic compound biosynthetic process (GO:1901362)	biological_process	CBD-THC - 12-14GW - DOWN	ACAT2|ACTA2|ALAS1|CYP17A1|ERG28|FDFT1|FDPS|HMGCR|HMGCS1|IDI1|MSMO1|PCLAF|PDE5A|RRM2|SCD|UTP4	16	21	4323	18398	5	0.000256358	m4	enriched
small molecule metabolic process (GO:0044281)	biological_process	CBD-THC - 12-14GW - DOWN	ACAT2|CYP17A1|FDFT1|FDPS|HMGCR|HMGCS1|IDI1|LDLR|MSMO1|PDE5A|RRM2|SCD	12	21	1876	18398	2	7.94848e-05	m5	top.enriched
hsa00900 Terpenoid backbone biosynthesis	kegg_pathway	CBD-THC - 12-14GW - DOWN	ACAT2|FDPS|HMGCR|HMGCS1|IDI1	5	18	22	8046	0	2.64782e-07	NA	enriched
hsa01100 Metabolic pathways	kegg_pathway	CBD-THC - 12-14GW - DOWN	ACAT2|ALAS1|CYP17A1|FDFT1|FDPS|HMGCR|HMGCS1|IDI1|MSMO1|PDE5A|RRM2|SCD	12	18	1526	8046	3	0.00208618	NA	enriched
Cholesterol metabolism with Bloch and Kandutsch-Russell pathways (WP4718)	WikiPathways	CBD-THC - 12-14GW - DOWN	ACAT2|FDFT1|FDPS|HMGCR|HMGCS1|IDI1|MSMO1|SCD	8	20	47	12535	0	3.44207e-12	m1	top.enriched
Mevalonate arm of cholesterol biosynthesis pathway (WP4190)	WikiPathways	CBD-THC - 12-14GW - DOWN	ACAT2|FDFT1|FDPS|HMGCR|HMGCS1|IDI1	6	20	13	12535	0	8.07116e-12	m2	top.enriched
Cholesterol biosynthesis, regulation and transport (WP4281)	WikiPathways	CBD-THC - 12-14GW - DOWN	ACAT2|FDFT1|FDPS|HMGCS1|IDI1	5	20	11	12535	0	3.74395e-10	m2	enriched
Cholesterol biosynthesis (WP1795)	WikiPathways	CBD-THC - 12-14GW - DOWN	ACAT2|FDFT1|FDPS|HMGCS1|IDI1|MSMO1	6	20	24	12535	0	1.6139e-10	m2	enriched
Mevalonate pathway (WP3963)	WikiPathways	CBD-THC - 12-14GW - DOWN	ACAT2|FDPS|HMGCR|HMGCS1	4	20	7	12535	0	1.71375e-08	m2	enriched
WikiPathways Academy: met-1-indirect (WP3909)	WikiPathways	CBD-THC - 12-14GW - DOWN	FDFT1|FDPS|HMGCR|HMGCS1|IDI1	5	20	10	12535	0	2.27133e-10	m3	top.enriched
Sterol regulatory element-binding proteins (SREBP) signaling (WP1982)	WikiPathways	CBD-THC - 12-14GW - DOWN	FDFT1|FDPS|HMGCR|HMGCS1|IDI1|LDLR|SCD	7	20	71	12535	0	1.24386e-09	m3	enriched
Activation of gene expression by SREBF (SREBP) (WP2706)	WikiPathways	CBD-THC - 12-14GW - DOWN	FDFT1|FDPS|HMGCR|HMGCS1|IDI1|SCD	6	20	41	12535	0	3.53618e-09	m3	enriched
WikiPathways Academy: met-1-last (WP3907)	WikiPathways	CBD-THC - 12-14GW - DOWN	FDFT1|FDPS|HMGCR|HMGCS1|IDI1|MSMO1	6	20	14	12535	0	8.07116e-12	m4	top.enriched
Cholesterol biosynthesis pathway (WP197)	WikiPathways	CBD-THC - 12-14GW - DOWN	FDFT1|FDPS|HMGCR|HMGCS1|IDI1|MSMO1	6	20	15	12535	0	8.07116e-12	m4	enriched
Cholesterol biosynthesis pathway. (WP5226)	WikiPathways	CBD-THC - 12-14GW - DOWN	FDFT1|FDPS|HMGCR|HMGCS1|IDI1|MSMO1	6	20	15	12535	0	8.07116e-12	m4	enriched
WikiPathways Academy: wp-publish test (WP3917)	WikiPathways	CBD-THC - 12-14GW - DOWN	FDFT1|FDPS|HMGCR|HMGCS1|IDI1|MSMO1	6	20	15	12535	0	8.07116e-12	m4	enriched
Cholesterol synthesis disorders (WP5193)	WikiPathways	CBD-THC - 12-14GW - DOWN	FDFT1|FDPS|HMGCR|HMGCS1|IDI1|MSMO1	6	20	18	12535	0	2.55863e-11	m4	enriched
SREBF and miR33 in cholesterol and lipid homeostasis (WP2011)	WikiPathways	CBD-THC - 12-14GW - DOWN	HMGCR|HMGCS1|LDLR|SCD	4	20	18	12535	0	1.37573e-06	m5	top.enriched
Statin inhibition of cholesterol production (WP430)	WikiPathways	CBD-THC - 12-14GW - DOWN	FDFT1|HMGCR|LDLR	3	20	31	12535	0	0.00128516	m6	top.enriched
Regulation of lipid metabolism by PPARalpha (WP2797)	WikiPathways	CBD-THC - 12-14GW - DOWN	ALAS1|FDFT1|HMGCR|HMGCS1	4	20	117	12535	0	0.0023426	m7	top.enriched
steroid biosynthetic process (GO:0006694)	biological_process	pca.mclust P1	DHCR7|ELOVL6|HMGCS1|EBP|MSMO1|NSDHL|FDPS|IDI1|HMGCR|FDFT1|ACAT2|ERG28	12	25	190	18398	0	1.53534e-14	m1	top.enriched
organic hydroxy compound biosynthetic process (GO:1901617)	biological_process	pca.mclust P1	DHCR7|ELOVL6|HMGCS1|EBP|MSMO1|NSDHL|FDPS|IDI1|HMGCR|FDFT1|ACAT2|ERG28	12	25	250	18398	0	2.40734e-13	m1	enriched
steroid metabolic process (GO:0008202)	biological_process	pca.mclust P1	DHCR7|ELOVL6|HMGCS1|EBP|MSMO1|NSDHL|FDPS|IDI1|HMGCR|FDFT1|ACAT2|ERG28	12	25	328	18398	0	5.70961e-12	m1	enriched
organic hydroxy compound metabolic process (GO:1901615)	biological_process	pca.mclust P1	DHCR7|ELOVL6|HMGCS1|EBP|MSMO1|NSDHL|FDPS|IDI1|HMGCR|FDFT1|ACAT2|ERG28	12	25	554	18398	1	1.91907e-09	m1	enriched
lipid biosynthetic process (GO:0008610)	biological_process	pca.mclust P1	DHCR7|ELOVL6|HMGCS1|EBP|MSMO1|NSDHL|FDPS|IDI1|HMGCR|FDFT1|ACAT2|ERG28	12	25	726	18398	1	3.76017e-08	m1	enriched
lipid metabolic process (GO:0006629)	biological_process	pca.mclust P1	DHCR7|ELOVL6|HMGCS1|EBP|MSMO1|NSDHL|FDPS|IDI1|HMGCR|FDFT1|ACAT2|ERG28	12	25	1423	18398	2	5.87657e-05	m1	enriched
sterol biosynthetic process (GO:0016126)	biological_process	pca.mclust P1	DHCR7|ELOVL6|HMGCS1|EBP|MSMO1|NSDHL|FDPS|IDI1|HMGCR|FDFT1|ACAT2|ERG28	12	25	78	18398	0	1.10715e-18	m1	enriched
sterol metabolic process (GO:0016125)	biological_process	pca.mclust P1	DHCR7|ELOVL6|HMGCS1|EBP|MSMO1|NSDHL|FDPS|IDI1|HMGCR|FDFT1|ACAT2|ERG28	12	25	165	18398	0	3.39721e-15	m1	enriched
cholesterol biosynthetic process (GO:0006695)	biological_process	pca.mclust P1	DHCR7|ELOVL6|HMGCS1|EBP|MSMO1|NSDHL|FDPS|IDI1|HMGCR|FDFT1|ACAT2	11	25	72	18398	0	3.37461e-17	m2	top.enriched
secondary alcohol biosynthetic process (GO:1902653)	biological_process	pca.mclust P1	DHCR7|ELOVL6|HMGCS1|EBP|MSMO1|NSDHL|FDPS|IDI1|HMGCR|FDFT1|ACAT2	11	25	72	18398	0	3.37461e-17	m2	enriched
cholesterol metabolic process (GO:0008203)	biological_process	pca.mclust P1	DHCR7|ELOVL6|HMGCS1|EBP|MSMO1|NSDHL|FDPS|IDI1|HMGCR|FDFT1|ACAT2	11	25	149	18398	0	7.29599e-14	m2	enriched
alcohol biosynthetic process (GO:0046165)	biological_process	pca.mclust P1	DHCR7|ELOVL6|HMGCS1|EBP|MSMO1|NSDHL|FDPS|IDI1|HMGCR|FDFT1|ACAT2	11	25	155	18398	0	9.75918e-14	m2	enriched
secondary alcohol metabolic process (GO:1902652)	biological_process	pca.mclust P1	DHCR7|ELOVL6|HMGCS1|EBP|MSMO1|NSDHL|FDPS|IDI1|HMGCR|FDFT1|ACAT2	11	25	158	18398	0	1.05962e-13	m2	enriched
alcohol metabolic process (GO:0006066)	biological_process	pca.mclust P1	DHCR7|ELOVL6|HMGCS1|EBP|MSMO1|NSDHL|FDPS|IDI1|HMGCR|FDFT1|ACAT2	11	25	372	18398	1	8.49605e-10	m2	enriched
small molecule biosynthetic process (GO:0044283)	biological_process	pca.mclust P1	DHCR7|ELOVL6|HMGCS1|EBP|MSMO1|NSDHL|FDPS|IDI1|HMGCR|FDFT1|ACAT2	11	25	687	18398	1	4.02491e-07	m2	enriched
small molecule metabolic process (GO:0044281)	biological_process	pca.mclust P1	DHCR7|ELOVL6|HMGCS1|EBP|MSMO1|NSDHL|FDPS|IDI1|HMGCR|FDFT1|ACAT2	11	25	1876	18398	3	0.00713403	m2	enriched
regulation of cholesterol biosynthetic process (GO:0045540)	biological_process	pca.mclust P1	DHCR7|ELOVL6|HMGCS1|FDPS|IDI1|HMGCR|FDFT1	7	25	48	18398	0	3.22464e-10	m3	top.enriched
regulation of sterol biosynthetic process (GO:0106118)	biological_process	pca.mclust P1	DHCR7|ELOVL6|HMGCS1|FDPS|IDI1|HMGCR|FDFT1	7	25	48	18398	0	3.22464e-10	m3	enriched
regulation of cholesterol metabolic process (GO:0090181)	biological_process	pca.mclust P1	DHCR7|ELOVL6|HMGCS1|FDPS|IDI1|HMGCR|FDFT1	7	25	61	18398	0	1.61955e-09	m3	enriched
regulation of alcohol biosynthetic process (GO:1902930)	biological_process	pca.mclust P1	DHCR7|ELOVL6|HMGCS1|FDPS|IDI1|HMGCR|FDFT1	7	25	75	18398	0	6.37017e-09	m3	enriched
regulation of steroid biosynthetic process (GO:0050810)	biological_process	pca.mclust P1	DHCR7|ELOVL6|HMGCS1|FDPS|IDI1|HMGCR|FDFT1	7	25	91	18398	0	2.41153e-08	m3	enriched
regulation of steroid metabolic process (GO:0019218)	biological_process	pca.mclust P1	DHCR7|ELOVL6|HMGCS1|FDPS|IDI1|HMGCR|FDFT1	7	25	122	18398	0	1.73868e-07	m3	enriched
regulation of lipid biosynthetic process (GO:0046890)	biological_process	pca.mclust P1	DHCR7|ELOVL6|HMGCS1|FDPS|IDI1|HMGCR|FDFT1	7	25	203	18398	0	5.56047e-06	m3	enriched
regulation of lipid metabolic process (GO:0019216)	biological_process	pca.mclust P1	DHCR7|ELOVL6|HMGCS1|FDPS|IDI1|HMGCR|FDFT1	7	25	402	18398	1	0.000494656	m3	enriched
regulation of small molecule metabolic process (GO:0062012)	biological_process	pca.mclust P1	DHCR7|ELOVL6|HMGCS1|FDPS|IDI1|HMGCR|FDFT1	7	25	434	18398	1	0.000764434	m3	enriched
farnesyl diphosphate metabolic process (GO:0045338)	biological_process	pca.mclust P1	HMGCS1|FDPS|FDFT1	3	25	5	18398	0	1.61031e-05	m4	top.enriched
isoprenoid biosynthetic process (GO:0008299)	biological_process	pca.mclust P1	HMGCS1|FDPS|IDI1|HMGCR	4	25	28	18398	0	3.69662e-05	m5	top.enriched
isoprenoid metabolic process (GO:0006720)	biological_process	pca.mclust P1	HMGCS1|FDPS|IDI1|HMGCR|FDFT1	5	25	143	18398	0	0.000763485	m6	top.enriched
cellular lipid metabolic process (GO:0044255)	biological_process	pca.mclust P1	ELOVL6|HMGCS1|MSMO1|FDPS|IDI1|HMGCR|FDFT1|ACAT2	8	25	1055	18398	1	0.0256425	m7	top.enriched
endoplasmic reticulum membrane (GO:0005789)	cellular_component	pca.mclust P1	DHCR7|ELOVL6|EBP|MSMO1|NSDHL|FATE1|HMGCR|FDFT1|ERG28	9	25	1113	19014	1	0.00522465	NA	enriched
endoplasmic reticulum subcompartment (GO:0098827)	cellular_component	pca.mclust P1	DHCR7|ELOVL6|EBP|MSMO1|NSDHL|FATE1|HMGCR|FDFT1|ERG28	9	25	1117	19014	1	0.00522465	NA	enriched
nuclear outer membrane-endoplasmic reticulum membrane network (GO:0042175)	cellular_component	pca.mclust P1	DHCR7|ELOVL6|EBP|MSMO1|NSDHL|FATE1|HMGCR|FDFT1|ERG28	9	25	1134	19014	1	0.00522465	NA	enriched
hsa00100 Steroid biosynthesis	kegg_pathway	pca.mclust P1	DHCR7|EBP|MSMO1|NSDHL|FDFT1	5	18	20	8046	0	1.32391e-07	NA	enriched
hsa00900 Terpenoid backbone biosynthesis	kegg_pathway	pca.mclust P1	HMGCS1|FDPS|IDI1|HMGCR|ACAT2	5	18	22	8046	0	1.32391e-07	NA	enriched
hsa01100 Metabolic pathways	kegg_pathway	pca.mclust P1	DHCR7|ELOVL6|HMGCS1|EBP|MSMO1|NSDHL|FDPS|IDI1|HMGCR|FDFT1|ACAT2	11	18	1526	8046	3	0.0105706	NA	enriched
Cholesterol metabolism with Bloch and Kandutsch-Russell pathways (WP4718)	WikiPathways	pca.mclust P1	DHCR7|HMGCS1|EBP|MSMO1|NSDHL|FDPS|IDI1|HMGCR|FDFT1|ACAT2	10	21	47	12535	0	2.3375e-17	m1	top.enriched
Cholesterol biosynthesis (WP1795)	WikiPathways	pca.mclust P1	DHCR7|HMGCS1|EBP|MSMO1|NSDHL|FDPS|IDI1|FDFT1|ACAT2	9	21	24	12535	0	2.3375e-17	m1	enriched
Cholesterol synthesis disorders (WP5193)	WikiPathways	pca.mclust P1	DHCR7|HMGCS1|EBP|MSMO1|FDPS|IDI1|HMGCR|FDFT1	8	21	18	12535	0	1.32092e-16	m1	enriched
Cholesterol biosynthesis pathway (WP197)	WikiPathways	pca.mclust P1	DHCR7|HMGCS1|MSMO1|NSDHL|FDPS|IDI1|HMGCR|FDFT1	8	21	15	12535	0	2.3375e-17	m2	top.enriched
Cholesterol biosynthesis pathway. (WP5226)	WikiPathways	pca.mclust P1	DHCR7|HMGCS1|MSMO1|NSDHL|FDPS|IDI1|HMGCR|FDFT1	8	21	15	12535	0	2.3375e-17	m2	enriched
WikiPathways Academy: wp-publish test (WP3917)	WikiPathways	pca.mclust P1	DHCR7|HMGCS1|MSMO1|NSDHL|FDPS|IDI1|HMGCR|FDFT1	8	21	15	12535	0	2.3375e-17	m2	enriched
WikiPathways Academy: met-1-last (WP3907)	WikiPathways	pca.mclust P1	HMGCS1|MSMO1|NSDHL|FDPS|IDI1|HMGCR|FDFT1	7	21	14	12535	0	7.96539e-15	m2	enriched
Mevalonate arm of cholesterol biosynthesis pathway (WP4190)	WikiPathways	pca.mclust P1	HMGCS1|FDPS|IDI1|HMGCR|FDFT1|ACAT2	6	21	13	12535	0	2.58649e-12	m3	top.enriched
Cholesterol biosynthesis, regulation and transport (WP4281)	WikiPathways	pca.mclust P1	DHCR7|HMGCS1|FDPS|IDI1|FDFT1|ACAT2	6	21	11	12535	0	7.85018e-13	m3	enriched
Mevalonate pathway (WP3963)	WikiPathways	pca.mclust P1	HMGCS1|FDPS|HMGCR|ACAT2	4	21	7	12535	0	2.29296e-08	m3	enriched
Activation of gene expression by SREBF (SREBP) (WP2706)	WikiPathways	pca.mclust P1	DHCR7|ELOVL6|HMGCS1|FDPS|IDI1|HMGCR|FDFT1	7	21	41	12535	0	3.55719e-11	m4	top.enriched
WikiPathways Academy: met-1-indirect (WP3909)	WikiPathways	pca.mclust P1	HMGCS1|FDPS|IDI1|HMGCR|FDFT1	5	21	10	12535	0	2.43828e-10	m4	enriched
Sterol regulatory element-binding proteins (SREBP) signaling (WP1982)	WikiPathways	pca.mclust P1	HMGCS1|FDPS|IDI1|HMGCR|FDFT1	5	21	71	12535	0	9.98845e-06	m4	enriched
Cholesterol biosynthesis with skeletal dysplasias (WP4804)	WikiPathways	pca.mclust P1	DHCR7|EBP|NSDHL	3	21	7	12535	0	1.36691e-05	m5	top.enriched
steroid biosynthetic process (GO:0006694)	biological_process	pca.mclust P2	SC5D|SQLE|TM7SF2|IGFBP7|MVD|STARD4|SCD|ACLY	8	33	190	18398	0	4.97433e-06	m1	top.enriched
steroid metabolic process (GO:0008202)	biological_process	pca.mclust P2	SC5D|SQLE|TM7SF2|IGFBP7|EPHX2|MVD|STARD4|SCD|ACLY	9	33	328	18398	1	8.58905e-06	m1	enriched
regulation of steroid metabolic process (GO:0019218)	biological_process	pca.mclust P2	SC5D|SQLE|TM7SF2|IGFBP7|EPHX2|MVD|STARD4|SCD	8	33	122	18398	0	5.73599e-07	m1	enriched
regulation of steroid biosynthetic process (GO:0050810)	biological_process	pca.mclust P2	SC5D|SQLE|TM7SF2|IGFBP7|MVD|STARD4|SCD	7	33	91	18398	0	1.76427e-06	m1	enriched
regulation of lipid biosynthetic process (GO:0046890)	biological_process	pca.mclust P2	SC5D|SQLE|SAMD8|TM7SF2|IGFBP7|MVD|STARD4|SCD	8	33	203	18398	0	6.71585e-06	m1	enriched
regulation of lipid metabolic process (GO:0019216)	biological_process	pca.mclust P2	SC5D|SQLE|SAMD8|TM7SF2|IGFBP7|EPHX2|MVD|STARD4|SCD	9	33	402	18398	1	2.68723e-05	m1	enriched
regulation of cholesterol metabolic process (GO:0090181)	biological_process	pca.mclust P2	SC5D|SQLE|TM7SF2|EPHX2|MVD|SCD	6	33	61	18398	0	4.97433e-06	m2	top.enriched
organic hydroxy compound metabolic process (GO:1901615)	biological_process	pca.mclust P2	SC5D|SQLE|TM7SF2|EPHX2|MVD|STARD4|SCD|ACLY	8	33	554	18398	1	0.00349927	m2	enriched
small molecule biosynthetic process (GO:0044283)	biological_process	pca.mclust P2	SC5D|SQLE|TM7SF2|EPHX2|MVD|STARD4|SCD|ACLY	8	33	687	18398	1	0.0138044	m2	enriched
cholesterol metabolic process (GO:0008203)	biological_process	pca.mclust P2	SC5D|SQLE|TM7SF2|EPHX2|MVD|SCD|ACLY	7	33	149	18398	0	1.13739e-05	m2	enriched
secondary alcohol metabolic process (GO:1902652)	biological_process	pca.mclust P2	SC5D|SQLE|TM7SF2|EPHX2|MVD|SCD|ACLY	7	33	158	18398	0	1.55432e-05	m2	enriched
sterol metabolic process (GO:0016125)	biological_process	pca.mclust P2	SC5D|SQLE|TM7SF2|EPHX2|MVD|SCD|ACLY	7	33	165	18398	0	1.92432e-05	m2	enriched
alcohol metabolic process (GO:0006066)	biological_process	pca.mclust P2	SC5D|SQLE|TM7SF2|EPHX2|MVD|SCD|ACLY	7	33	372	18398	1	0.00283862	m2	enriched
regulation of small molecule metabolic process (GO:0062012)	biological_process	pca.mclust P2	SC5D|SQLE|TM7SF2|EPHX2|MVD|STARD4|SCD	7	33	434	18398	1	0.00708253	m2	enriched
cholesterol biosynthetic process (GO:0006695)	biological_process	pca.mclust P2	SC5D|SQLE|TM7SF2|MVD|SCD|ACLY	6	33	72	18398	0	6.76834e-06	m3	top.enriched
secondary alcohol biosynthetic process (GO:1902653)	biological_process	pca.mclust P2	SC5D|SQLE|TM7SF2|MVD|SCD|ACLY	6	33	72	18398	0	6.76834e-06	m3	enriched
sterol biosynthetic process (GO:0016126)	biological_process	pca.mclust P2	SC5D|SQLE|TM7SF2|MVD|SCD|ACLY	6	33	78	18398	0	8.58905e-06	m3	enriched
alcohol biosynthetic process (GO:0046165)	biological_process	pca.mclust P2	SC5D|SQLE|TM7SF2|MVD|SCD|ACLY	6	33	155	18398	0	0.000251	m3	enriched
regulation of cholesterol biosynthetic process (GO:0045540)	biological_process	pca.mclust P2	SC5D|SQLE|TM7SF2|MVD|SCD	5	33	48	18398	0	2.50693e-05	m3	enriched
regulation of sterol biosynthetic process (GO:0106118)	biological_process	pca.mclust P2	SC5D|SQLE|TM7SF2|MVD|SCD	5	33	48	18398	0	2.50693e-05	m3	enriched
regulation of alcohol biosynthetic process (GO:1902930)	biological_process	pca.mclust P2	SC5D|SQLE|TM7SF2|MVD|SCD	5	33	75	18398	0	0.000201082	m3	enriched
organic hydroxy compound biosynthetic process (GO:1901617)	biological_process	pca.mclust P2	SC5D|SQLE|TM7SF2|MVD|STARD4|SCD|ACLY	7	33	250	18398	0	0.000221127	m3	enriched
lipid biosynthetic process (GO:0008610)	biological_process	pca.mclust P2	SC5D|SQLE|SAMD8|TM7SF2|IGFBP7|EPHX2|MVD|LPIN1|STARD4|SCD|ACLY	11	33	726	18398	1	2.93219e-05	m4	top.enriched
lipid metabolic process (GO:0006629)	biological_process	pca.mclust P2	SC5D|SQLE|SAMD8|TM7SF2|IGFBP7|EPHX2|MVD|LPIN1|STARD4|SCD|ACLY	11	33	1423	18398	3	0.0138044	m4	enriched
regulation of biosynthetic process (GO:0009889)	biological_process	pca.mclust P2	H4C3|ACTN1|SC5D|ZNF626|DACT1|SQLE|SAMD8|TM7SF2|IGFBP7|MAPK8IP1|FBXO5|ZNF239|MVD|LPIN1|HYAL2|DDAH2|STARD4|SCD|TSHZ1	19	33	4234	18398	8	0.0130425	m5	top.enriched
regulation of primary metabolic process (GO:0080090)	biological_process	pca.mclust P2	H4C3|ACTN1|SC5D|ZNF626|DACT1|SQLE|SAMD8|TM7SF2|IGFBP7|MAPK8IP1|ITGB3|FBXO5|ZNF239|EPHX2|MVD|LPIN1|SLC39A10|BST1|HYAL2|STARD4|SCD|TSHZ1	22	33	5917	18398	11	0.0293772	m6	top.enriched
endoplasmic reticulum (GO:0005783)	cellular_component	pca.mclust P2	TMEM97|SC5D|SQLE|SAMD8|TM7SF2|IGFBP7|EXTL2|MAPK8IP1|LPIN1|HYAL2|CPED1|STARD4|SCD	13	34	1951	19014	3	0.0310329	NA	enriched
hsa00100 Steroid biosynthesis	kegg_pathway	pca.mclust P2	SC5D|SQLE|TM7SF2	3	20	20	8046	0	0.00491247	NA	enriched
hsa01100 Metabolic pathways	kegg_pathway	pca.mclust P2	SC5D|SQLE|TM7SF2|EXTL2|ACP2|EPHX2|MVD|LPIN1|BST1|HYAL2|SCD|ACLY	12	20	1526	8046	4	0.0096922	NA	enriched
Activation of gene expression by SREBF (SREBP) (WP2706)	WikiPathways	pca.mclust P2	SC5D|SQLE|TM7SF2|MVD|SCD	5	29	41	12535	0	4.41799e-05	m1	top.enriched
Cholesterol metabolism with Bloch and Kandutsch-Russell pathways (WP4718)	WikiPathways	pca.mclust P2	SC5D|SQLE|TM7SF2|MVD|SCD	5	29	47	12535	0	4.47841e-05	m2	top.enriched
Cholesterol biosynthesis (WP1795)	WikiPathways	pca.mclust P2	SC5D|SQLE|TM7SF2|MVD	4	29	24	12535	0	0.000107379	m3	top.enriched
Sterol regulatory element-binding proteins (SREBP) signaling (WP1982)	WikiPathways	pca.mclust P2	SQLE|MVD|LPIN1|SCD|ACLY	5	29	71	12535	0	0.000182904	m4	top.enriched
WikiPathways Academy: met-1-last (WP3907)	WikiPathways	pca.mclust P2	SC5D|SQLE|MVD	3	29	14	12535	0	0.000842166	m5	top.enriched
Cholesterol biosynthesis pathway (WP197)	WikiPathways	pca.mclust P2	SC5D|SQLE|MVD	3	29	15	12535	0	0.000842166	m5	enriched
Cholesterol biosynthesis pathway. (WP5226)	WikiPathways	pca.mclust P2	SC5D|SQLE|MVD	3	29	15	12535	0	0.000842166	m5	enriched
WikiPathways Academy: wp-publish test (WP3917)	WikiPathways	pca.mclust P2	SC5D|SQLE|MVD	3	29	15	12535	0	0.000842166	m5	enriched
Cholesterol synthesis disorders (WP5193)	WikiPathways	pca.mclust P2	SC5D|SQLE|MVD	3	29	18	12535	0	0.00133628	m5	enriched
response to toxic substance (GO:0009636)	biological_process	pca.mclust P5	MT1X|MT1F|ATF4|SLC30A1|MT1E|MT1G	6	30	236	18398	0	0.00146274	m1	top.enriched
response to metal ion (GO:0010038)	biological_process	pca.mclust P5	MT1X|MT1F|ATF4|SLC30A1|MT1E|MT1G	6	30	349	18398	1	0.00995947	m1	enriched
detoxification of inorganic compound (GO:0061687)	biological_process	pca.mclust P5	MT1X|MT1F|SLC30A1|MT1E|MT1G	5	30	17	18398	0	5.48682e-07	m1	enriched
cellular zinc ion homeostasis (GO:0006882)	biological_process	pca.mclust P5	MT1X|MT1F|SLC30A1|MT1E|MT1G	5	30	38	18398	0	1.25692e-05	m1	enriched
response to zinc ion (GO:0010043)	biological_process	pca.mclust P5	MT1X|MT1F|SLC30A1|MT1E|MT1G	5	30	57	18398	0	5.70083e-05	m1	enriched
response to cadmium ion (GO:0046686)	biological_process	pca.mclust P5	MT1X|MT1F|SLC30A1|MT1E|MT1G	5	30	60	18398	0	6.66964e-05	m1	enriched
detoxification (GO:0098754)	biological_process	pca.mclust P5	MT1X|MT1F|SLC30A1|MT1E|MT1G	5	30	136	18398	0	0.00183288	m1	enriched
stress response to metal ion (GO:0097501)	biological_process	pca.mclust P5	MT1X|MT1F|SLC30A1|MT1E|MT1G	5	30	18	18398	0	5.48682e-07	m1	enriched
zinc ion homeostasis (GO:0055069)	biological_process	pca.mclust P5	MT1X|MT1F|SLC30A1|MT1E|MT1G	5	30	40	18398	0	1.37e-05	m1	enriched
cellular divalent inorganic cation homeostasis (GO:0072503)	biological_process	pca.mclust P5	MT1X|MT1F|ATF4|SLC30A1|MT1E|DDIT3|MT1G	7	30	478	18398	1	0.00593793	m1	enriched
divalent inorganic cation homeostasis (GO:0072507)	biological_process	pca.mclust P5	MT1X|MT1F|ATF4|SLC30A1|MT1E|DDIT3|MT1G	7	30	497	18398	1	0.00699601	m1	enriched
cellular transition metal ion homeostasis (GO:0046916)	biological_process	pca.mclust P5	MT1X|MT1F|SLC30A1|FTH1|MT1E|FTL|MT1G	7	30	117	18398	0	3.37801e-06	m2	top.enriched
transition metal ion homeostasis (GO:0055076)	biological_process	pca.mclust P5	MT1X|MT1F|SLC30A1|FTH1|MT1E|FTL|MT1G	7	30	138	18398	0	8.08791e-06	m2	enriched
cellular response to zinc ion (GO:0071294)	biological_process	pca.mclust P5	MT1X|MT1F|MT1E|MT1G	4	30	24	18398	0	8.68406e-05	m3	top.enriched
cellular response to copper ion (GO:0071280)	biological_process	pca.mclust P5	MT1X|MT1F|MT1E|MT1G	4	30	28	18398	0	0.000152694	m3	enriched
cellular response to cadmium ion (GO:0071276)	biological_process	pca.mclust P5	MT1X|MT1F|MT1E|MT1G	4	30	38	18398	0	0.000466534	m3	enriched
response to copper ion (GO:0046688)	biological_process	pca.mclust P5	MT1X|MT1F|MT1E|MT1G	4	30	40	18398	0	0.000537887	m3	enriched
detoxification of copper ion (GO:0010273)	biological_process	pca.mclust P5	MT1X|MT1F|MT1E|MT1G	4	30	15	18398	0	1.54957e-05	m3	enriched
stress response to copper ion (GO:1990169)	biological_process	pca.mclust P5	MT1X|MT1F|MT1E|MT1G	4	30	15	18398	0	1.54957e-05	m3	enriched
cellular response to metal ion (GO:0071248)	biological_process	pca.mclust P5	MT1X|MT1F|ATF4|MT1E|MT1G	5	30	188	18398	0	0.00699601	m3	enriched
cellular response to inorganic substance (GO:0071241)	biological_process	pca.mclust P5	MT1X|MT1F|ATF4|MT1E|MT1G	5	30	215	18398	0	0.0124713	m3	enriched
cellular metal ion homeostasis (GO:0006875)	biological_process	pca.mclust P5	MT1X|MT1F|ATF4|SLC30A1|FTH1|MT1E|DDIT3|FTL|MT1G	9	30	572	18398	1	0.000250551	m4	top.enriched
metal ion homeostasis (GO:0055065)	biological_process	pca.mclust P5	MT1X|MT1F|ATF4|SLC30A1|FTH1|MT1E|DDIT3|FTL|MT1G	9	30	644	18398	1	0.000552464	m4	enriched
cellular cation homeostasis (GO:0030003)	biological_process	pca.mclust P5	MT1X|MT1F|ATF4|SLC30A1|FTH1|MT1E|DDIT3|FTL|MT1G	9	30	652	18398	1	0.000576593	m4	enriched
cellular ion homeostasis (GO:0006873)	biological_process	pca.mclust P5	MT1X|MT1F|ATF4|SLC30A1|FTH1|MT1E|DDIT3|FTL|MT1G	9	30	665	18398	1	0.000642291	m4	enriched
cation homeostasis (GO:0055080)	biological_process	pca.mclust P5	MT1X|MT1F|ATF4|SLC30A1|FTH1|MT1E|DDIT3|FTL|MT1G	9	30	727	18398	1	0.00127719	m4	enriched
inorganic ion homeostasis (GO:0098771)	biological_process	pca.mclust P5	MT1X|MT1F|ATF4|SLC30A1|FTH1|MT1E|DDIT3|FTL|MT1G	9	30	737	18398	1	0.00135856	m4	enriched
ion homeostasis (GO:0050801)	biological_process	pca.mclust P5	MT1X|MT1F|ATF4|SLC30A1|FTH1|MT1E|DDIT3|FTL|MT1G	9	30	784	18398	1	0.00196649	m4	enriched
cellular chemical homeostasis (GO:0055082)	biological_process	pca.mclust P5	MT1X|MT1F|ATF4|SLC30A1|FTH1|MT1E|DDIT3|FTL|MT1G	9	30	808	18398	1	0.00241332	m4	enriched
cellular homeostasis (GO:0019725)	biological_process	pca.mclust P5	MT1X|MT1F|ATF4|SLC30A1|FTH1|MT1E|DDIT3|FTL|MT1G	9	30	934	18398	2	0.00699601	m4	enriched
chemical homeostasis (GO:0048878)	biological_process	pca.mclust P5	MT1X|MT1F|ATF4|SLC30A1|FTH1|MT1E|DDIT3|FTL|MT1G	9	30	1183	18398	2	0.0368734	m4	enriched
hsa04978 Mineral absorption	kegg_pathway	pca.mclust P5	MT1X|MT1F|SLC30A1|FTH1|MT1E|FTL|MT1G	7	20	60	8046	0	2.16621e-08	NA	enriched
Metallothioneins bind metals (WP3814)	WikiPathways	pca.mclust P5	MT1X|MT1F|MT1E|MT1G	4	26	11	12535	0	6.43789e-06	NA	enriched
Zinc homeostasis (WP3529)	WikiPathways	pca.mclust P5	MT1X|MT1F|SLC30A1|MT1E|MT1G	5	26	37	12535	0	7.20877e-06	NA	enriched
Copper homeostasis (WP3286)	WikiPathways	pca.mclust P5	MT1X|MT1F|MT1E|MT1G	4	26	54	12535	0	0.00193592	NA	enriched
